# Supplementary material
Source: PubMed Central journal article supplement (PMC2148299)
Supplement: pnas_0708194104_3.pdf [file pnas_0708194104_3.pdf]

SI Table 1. Summary of QTL position and significance.

| Drug | Cross | Chromosome | Coordinate | LOD   | Percent variation | P value F test |
|------|-------|------------|------------|-------|-------------------|----------------|
| 1    | MY    | 7          | 756419     | 13.9  | 70                | 2.45E-13       |
| 1    | MS    | 7          | 761838     | 6.409 | 40.3              | 0.00000164     |
| 2    | MY    | 4          | 894645     | 3.695 | 7.1               | 0.0111         |
| 2    | MY    | 7          | 778093     | 11.33 | 40.3              | 0.000000014    |
| 2    | MS    | 7          | 772675     | 7.014 | 42.2              | 0.000000782    |
| 3    | MS    | 4          | 513764     | 8.001 | 59.4              | 2.4E-10        |
| 3    | YS    | 4          | 487994     | 6.867 | 44                | 0.0000005      |
| 4    | MY    | 4          | 868778     | 2.892 | 5.19              | 0.0675         |
| 4    | MY    | 7          | 767256     | 10.68 | 37.3              | 0.000000522    |
| 4    | MS    | 7          | 772675     | 4.68  | 34.6              | 0.0000138      |
| 5    | MY    | 4          | 894645     | 3.384 | 7.7               | 0.00642        |
| 5    | MY    | 7          | 767256     | 12.61 | 43.5              | 2.95E-09       |
| 5    | MS    | 7          | 740164     | 5.019 | 38.1              | 0.00000387     |
| 6    | MY    | 4          | 901095     | 3.167 | 5.62              | 0.0751         |
| 6    | MY    | 7          | 729365     | 11.76 | 30                | 0.0000014      |
| 6    | MY    | 11         | 633653     | 3.294 | 4.29              | 0.156          |
| 6    | YS    | 5          | 104539     | 6.729 | 40.5              | 0.00000197     |
| 9    | MY    | 4          | 907546     | 3.864 | 13.7              | 0.0055         |
| 9    | MY    | 7          | 756419     | 5.338 | 19.3              | 0.000872       |
| 9    | MS    | 7          | 756419     | 5.099 | 34.5              | 0.0000141      |
| 10   | MY    | 7          | 723978     | 7.689 | 48.6              | 5.24E-08       |
| 11   | MS    | 7          | 751001     | 4.766 | 33                | 0.0000245      |
| 11   | YS    | 5          | 104539     | 5.683 | 40.4              | 0.00000211     |
| 12   | MY    | 7          | 761838     | 12.62 | 65.2              | 6.97E-12       |
| 12   | MS    | 7          | 756419     | 4.745 | 34                | 0.0000173      |
| 12   | YS    | 14         | 530124     | 3.86  | 23.5              | 0.00064        |
| 13   | MY    | 7          | 783512     | 9.592 | 53.5              | 5.34E-09       |
| 15   | MY    | 4          | 894645     | 3.955 | 7.95              | 0.0107         |
| 15   | MY    | 7          | 761838     | 9.187 | 35.2              | 0.000000218    |
| 17   | YS    | 5          | 70322      | 9.469 | 52.2              | 1.41E-08       |
| 18   | MY    | 7          | 736100     | 9.534 | 63.3              | 2.36E-11       |
| 18   | MS    | 7          | 799767     | 5.391 | 40.7              | 0.0000014      |
| 19   | MY    | 7          | 761838     | 8.496 | 53.8              | 4.4E-09        |
| 19   | MS    | 7          | 751001     | 7.308 | 51.3              | 1.54E-08       |
| 20   | MY    | 7          | 772675     | 9.345 | 50.9              | 0.000000018    |
| 20   | MS    | 7          | 799767     | 7.839 | 55.4              | 2.02E-09       |
| 21   | MY    | 7          | 772675     | 14.07 | 44.8              | 7.52E-10       |
| 21   | MY    | 11         | 633653     | 3.387 | 9.18              | 0.00186        |
| 21   | MS    | 7          | 756419     | 7.005 | 41                | 0.00000126     |
| 22   | MY    | 4          | 894645     | 3.386 | 4.2               | 0.0537         |
| 22   | MY    | 7          | 761838     | 12.58 | 43.7              | 2.42E-09       |
| 22   | MS    | 7          | 756419     | 7.044 | 41.5              | 0.00000102     |
| 23   | MY    | 7          | 761838     | 10.23 | 54.4              | 3.28E-09       |
| 24   | MY    | 7          | 761838     | 13.1  | 64.9              | 8.77E-12       |
| 24   | MS    | 7          | 761838     | 4.26  | 31.5              | 0.0000409      |
| 26   | MY    | 7          | 778093     | 14.74 | 69.9              | 2.52E-13       |
| 26   | MS    | 5          | 84029      | 4.11  | 33.1              | 2.31E-05       |
| 27   | MY    | 7          | 788930     | 10.31 | 41.5              | 2.03E-08       |
| 27   | MY    | 16         | 894088     | 3.444 | 7.31              | 0.0126         |
| 27   | MS    | 7          | 772675     | 5.755 | 37.4              | 0.00000504     |
| 28   | MY    | 7          | 778093     | 9.555 | 57.5              | 6.66E-10       |
| 28   | YS    | 4          | 120375     | 4.437 | 23                | 0.000747       |
| 29   | MY    | 4          | 868778     | 3.65  | 7.17              | 0.0273         |
| 29   | MY    | 7          | 745582     | 7.278 | 30.8              | 0.00000396     |
| 29   | MS    | 7          | 761838     | 7.607 | 48.4              | 5.75E-08       |
| 31   | MY    | 7          | 718590     | 4.782 | 33.9              | 0.0000179      |
