# Supplementary material
Source: PubMed Central journal article supplement (PMC2148299)
Supplement: pnas_0708194104_4.pdf [file pnas_0708194104_4.pdf]

SI Table 2. Natural yeast isolates.

| Strain        | Location          | Source                                |
|---------------|-------------------|---------------------------------------|
| 273614X       | RVI, Newcaslte UK | Clinical isolate (Fecal)              |
| YIlc17_E5     | Sauternes, France | Wine                                  |
| YPS163        | Pennsylvania, USA | Oak                                   |
| YPS128        | Pennsylvania, USA | Oak                                   |
| Y55           | France            | Wine                                  |
| NC-02         | USA               | Forest                                |
| YPS606        | Pennsylvania, USA | Oak                                   |
| YS9           | Singapore         | Baker strain                          |
| UWOPS05-227.2 | Malaysia          | Trigona, Bertam palm                  |
| T7            | USA               | Oak                                   |
| PW5           | Nigeria           | Palm wine                             |
| UWOPS03-461.4 | Malaysia          | Nectar, Bertam palm                   |
| 378604X       | RVI, Newcaslte UK | Clinical isolate (Sputum)             |
| YPS1009       | USA               | Oak                                   |
| DBVPG6765     | Unknown           | Unknown                               |
| UWOPS83-787.3 | Bahamas           | Fruit, Opuntia stricta                |
| IL-01         | USA               | Soil                                  |
| UWOPS05-217.3 | Malaysia          | Nectar, Bertam palm                   |
| L-1374        | Chile             | Wine                                  |
| DBVPG6040     | Netherland        | Fermenting fruite juice               |
| YJM428        | USA               | Clinical                              |
| YJM440        | USA               | Clinical                              |
| DBVPG1106     | Australia         | Grapes                                |
| DBVPG6044     | West Africa       | Bili wine                             |
| Y12           | Africa            | Palm wine strain                      |
| YJM421        | USA               | Clinical                              |
| YJM269        |                   | Apple juice fermentation              |
| Y9-7          | Indonesia         | Fermentation (ragi)                   |
| YJM339-1      | USA               | Clinical                              |
| YJM436        | Europe            | Clinical                              |
| L-1528        | Chile             | Wine                                  |
| YS4           | Netherland        | Baker strain                          |
| DBVPG1853     | Ethiopia          | White tecc                            |
| YJM280        | USA               | Clinical                              |
| YJM326        | USA               | Clinical                              |
| YJM975        | Bergamo, Italy    | Clinical isolate (Vaginal)            |
| YJM320        | USA               | Clinical                              |
| SK1           | USA               | Soil                                  |
| CLIB382       | Japan             | Beer                                  |
| Y3            | Africa            | Palm wine                             |
| YJM978        | Bergamo, Italy    | Clinical isolate (Vaginal)            |
| CLIB215       | New Zealand       | Baker                                 |
| YJM981        | Bergamo, Italy    | Clinical isolate (Vaginal)            |
| NCYC110       | West Africa       | Ginger beer from <i>Z. officinale</i> |
| DBVPG1373     | Netherland        | soil                                  |
| I14           | Italy             | Vineyard                              |
| CLIB324       | Vietnam           | Baker                                 |
| Y10           | Philippines       | Coconut                               |
| FL100         |                   | Lab strain                            |
| DBVPG1788     | Finland           | Soil                                  |
| S288C         | California, USA   | Rotting fig                           |
| T73           | Spain             | Wine                                  |
| YJM653        |                   | Clinical                              |
| YS2           | Australia         | Baker strain                          |
| WE372         | South Africa      | Wine                                  |
| UC5-2         | Japan             | Sake                                  |
| CBS7960       | South Africa      | Sugar cane                            |
| M22           | Italy             | Wine                                  |
| UWOPS87-2421  | Hawaii            | Cladode, <i>Opuntia megacantha</i>    |
| NCYC361       | Ireland           | Beer spoilage strain from wort        |
