# Supplementary material
Source: PubMed Central journal article supplement (PMC2148299)
Supplement: pnas_0708194104_5.pdf [file pnas_0708194104_5.pdf]

SI Table 3. The 72 compounds and their final growth concentrations.

| Drug name                                        | Concentration | Strains' relative sensitivity* |        |       | Drug number<br>in the paper |
|--------------------------------------------------|---------------|--------------------------------|--------|-------|-----------------------------|
|                                                  |               | M22                            | YPS163 | S288c |                             |
| Atenolol                                         | 2mM           | S                              | R      | R     | 1                           |
| (-)-Isoproterenol hydrochloride                  | 2mM           | S                              | R      | R     | 2                           |
| Lithium Chloride                                 | 2mM           | S                              | S      | R     | 3                           |
| Antozoline hydrochloride                         | 1mM           | S                              | R      | R     | 4                           |
| Molsidomine                                      | 2mM           | S                              | R      | R     | 5                           |
| Cisplatin                                        | 50µM          | S                              | R      | M     | 6                           |
| 4-Methylpyrazole hydrochloride                   | 2mM           | R                              | S      | R     | 7                           |
| Nialamide                                        | 4mM           | M                              | R      | S     | 8                           |
| Idazoxan hydrochloride                           | 2mM           | S                              | R      | R     | 9                           |
| Fluphenazine dihydrochloride                     | 12.5µM        | S                              | R      | R     | 10                          |
| N-Ethylmaleimide                                 | 3.125µM       | S                              | S      | R     | 11                          |
| Dipropyldopamine hydrobromide                    | 2mM           | S                              | R      | M     | 12                          |
| Menadione sodium bisulfite                       | 25µM          | S                              | R      | S     | 13                          |
| Hydrogen peroxide                                | 0.00375%      | R                              | S      | R     | 14                          |
| Hydrocortisone 21-hemisuccinate sodium           | 2mM           | S                              | R      | S     | 15                          |
| 1-[2-(Trifluoromethyl)Phenyl]Imidazole           | 200µM         | S                              | R      | S     | 16                          |
| 9-Amino-1,2,3,4-tetrahydroacridine hydrochloride | 200µM         | S                              | R      | S     | 17                          |
| Propafenone hydrochloride                        | 200µM         | S                              | R      | R     | 18                          |
| Minoxidil                                        | 2mM           | S                              | R      | R     | 19                          |
| Acetylthiocholine chloride                       | 200µM         | S                              | R      | R     | 20                          |
| Cefmetazole sodium                               | 2mM           | S                              | R      | R     | 21                          |
| Phenylephrine hydrochloride                      | 2mM           | S                              | R      | R     | 22                          |
| Alprenolol hydrochloride                         | 200µM         | S                              | R      | R     | 23                          |
| Tiapride hydrochloride                           | 2mM           | S                              | R      | R     | 24                          |
| Benserazide hydrochloride                        | 200µM         | M                              | R      | S     | 25                          |
| Ethosuximide                                     | 2mM           | M                              | R      | S     | 26                          |
| Aminoguanidine hemisulfate                       | 2mM           | S                              | R      | R     | 27                          |
| 2,3-Butanedione monoxime                         | 2mM           | S                              | R      | M     | 28                          |
| 1-(m-Chlorophenyl)-biguanide hydrochloride       | 200µM         | S                              | R      | R     | 29                          |
| Cyproheptadine hydrochloride                     | 50µM          | S                              | R      | M     | 30                          |
| Palmitoyl-DL-Carnitine chloride                  | 12.5µM        | S                              | R      | S     | 31                          |

| Drug name                             | Concentration | Strains' relative sensitivity* |        |       | Drug number<br>in the paper |
|---------------------------------------|---------------|--------------------------------|--------|-------|-----------------------------|
|                                       |               | M22                            | YPS163 | S288c |                             |
| Promethiazine hydrochloride           | 12.5µM        | S                              | R      | R     | NA                          |
| Perphenazine                          | 12.5µM        | S                              | R      | S     | NA                          |
| Tamoxifen                             | 12.5µM        | S                              | R      | R     | NA                          |
| 4-Aminopyridine                       | 200µM         | S                              | R      | R     | NA                          |
| Lansoprazole                          | 200µM         | S                              | R      | R     | NA                          |
| (-)-Bicuculline methbromide           | 200µM         | S                              | R      | R     | NA                          |
| (+)-Chlorpheniramine maleate          | 200µM         | S                              | R      | R     | NA                          |
| Progesterone                          | 200µM         | S                              | R      | S     | NA                          |
| Aminophylline ethylenediamine         | 200µM         | S                              | R      | R     | NA                          |
| 3-Amino-1-propanesulfonic acid sodium | 200µM         | S                              | R      | R     | NA                          |
| Clonidine hydrochloride               | 200µM         | S                              | R      | R     | NA                          |
| Urapidil hydrochloride                | 200µM         | S                              | R      | R     | NA                          |
| Paromomycin sulfate                   | 200µM         | S                              | R      | R     | NA                          |
| Fenofibrate                           | 200µM         | S                              | R      | R     | NA                          |
| Tropicamide                           | 200µM         | S                              | R      | R     | NA                          |
| Triamterene                           | 200µM         | S                              | R      | R     | NA                          |
| Emodin                                | 200µM         | S                              | R      | R     | NA                          |
| Phentolamine mesylate                 | 200µM         | S                              | R      | R     | NA                          |
| (+)-Synephrine                        | 200µM         | S                              | R      | R     | NA                          |
| Terfenadine                           | 200µM         | S                              | S      | R     | NA                          |
| Copper sulfate                        | 2mM           | R                              | S      | R     | NA                          |
| Ancitabine hydrochloride              | 2mM           | S                              | R      | S     | NA                          |
| 1,7-Dimethylxanthine                  | 2mM           | S                              | R      | R     | NA                          |
| Chloroquine diphosphate               | 2mM           | S                              | R      | S     | NA                          |
| Cephalosporin C zinc salt             | 2mM           | S                              | R      | S     | NA                          |
| O6-benzylguanine                      | 2mM           | S                              | R      | S     | NA                          |
| Oxolinic acid                         | 2mM           | S                              | R      | S     | NA                          |
| L-Glutamic acid                       | 2mM           | S                              | R      | R     | NA                          |
| GABA                                  | 2mM           | S                              | R      | R     | NA                          |
| 1,3-Dimethyl-8-phenylxanthine         | 2mM           | S                              | R      | R     | NA                          |
| L-Aspartic acid                       | 2mM           | S                              | R      | R     | NA                          |
| 3-Aminopropionitrile fumarate         | 2mM           | S                              | R      | R     | NA                          |

| Drug name                       | Concentration | Strains' relative sensitivity* |        |       | Drug number<br>in the paper |
|---------------------------------|---------------|--------------------------------|--------|-------|-----------------------------|
|                                 |               | M22                            | YPS163 | S288c |                             |
| DL-Buthionine-[S,R]-sulfoximine | 2mM           | S                              | R      | R     | NA                          |
| L-Canavanine sulfate            | 2mM           | S                              | R      | R     | NA                          |
| (+)-Octopamine hydrochloride    | 2mM           | S                              | R      | S     | NA                          |
| Terbutaline hemisulfate         | 2mM           | S                              | R      | R     | NA                          |
| 5-fluoro-5-deoxyuridine         | 2mM           | R                              | R      | S     | NA                          |
| (+)-Epinephrine hydrochloride   | 2mM           | R                              | R      | S     | NA                          |
| Prilocaine hydrochloride        | 2mM           | S                              | R      | S     | NA                          |
| Dopamine hydrochloride          | 2mM           | S                              | R      | S     | NA                          |
| Methyl-Dopa                     | 2mM           | S                              | R      | R     | NA                          |

Compound stocks were prepared at 0.1 M in DMSO and stored at -20°C, except for hydrogen peroxide. Before using, each compound was dilute in water and added to 90 µL cultures at final concentrations shown above. \*

Strains' sensitivity is represented as R: resistant, S: sensitive, or M: intermediate.
