# Supplementary material
Source: PubMed Central journal article supplement (PMC2148299)
Supplement: pnas_0708194104_6.pdf [file pnas_0708194104_6.pdf]

## SI Dataset 1

Genotype and phenotype data used in the paper are available in R/qtl csv format (Broman KW, Wu H, Sen S, Churchil GA (2003) *Bioinformatics* 19:889-890.).

### 1. Genotype and phenotype data for the MY cross

"Atenolol," "IsoproterenolHCl," "LiCl," "AntozolinHCl," "Molsidomine," "Cisplatin," "4-Methylpyrazole hydrochloride," "Nialamide," "Idazoxan hydrochloride," "FluphenazinediHCl," "N-Ethylmaleimide," "DipropyldopamineHBr," "Menadione," "H2O2," "Hydrocortisone 21-hemisuccinate sodium," "1-[2-(Trifluoromethyl)phenyl]imidazole," "9-Amino-1,2,3,4-tetrahydroacridine hydrochloride," "Propafenone hydrochloride," "Minoxidil," "Acetylthiocholine chloride," "Cefmetazole sodium," "Phenylephrine hydrochloride," "Alprenolol hydrochloride," "Tiapride hydrochloride," "Benserazide hydrochloride," "Ethosuximide," "Aminoguanidine hemisulfate," "2,3-Butanedione monoxime," "1-(m-Chlorophenyl)-biguanide HCl," "Cyproheptadine," "Palmitoyl-DL-Carnitine chloride," "M1\_1," "M1\_2," "M1\_3," "M1\_4," "M2\_1," "M2\_2," "M2\_3," "M2\_4," "M2\_5," "M2\_6," "M2\_7," "M2\_8," "M2\_9," "M2\_10," "M2\_11," "M2\_12," "M2\_13," "M3\_1," "M3\_2," "M3\_3," "M3\_4," "M3\_5," "M4\_1," "M4\_2," "M4\_3," "M4\_4," "M4\_5," "M4\_6," "M4\_7," "M4\_8," "M4\_9," "M4\_10," "M4\_11," "M4\_12," "M4\_13," "M4\_14," "M4\_15," "M4\_16," "M4\_17," "M4\_18," "M4\_19," "M4\_20," "M4\_21," "M4\_22," "M4\_23," "M4\_24," "M4\_25," "M5\_1," "M5\_2," "M5\_3," "M5\_4," "M5\_5," "M5\_6," "M5\_7," "M5\_8," "M5\_9," "M5\_10," "M6\_1," "M6\_2," "M6\_3," "M6\_4," "M7\_1," "M7\_2," "M7\_3," "M7\_4," "M7\_5," "M7\_6," "M7\_7," "M7\_8," "M7\_9," "M7\_10," "M7\_11," "M7\_12," "M7\_13," "M7\_14," "M7\_15," "M7\_16," "M7\_17," "M7\_18," "M8\_1," "M8\_2," "M8\_3," "M8\_4," "M8\_5," "M8\_6," "M8\_7," "M8\_8," "M8\_9," "M9\_1," "M9\_2," "M9\_3," "M9\_4," "M9\_5," "M9\_6," "M9\_7," "M10\_1," "M10\_2," "M10\_3," "M10\_4," "M10\_5," "M10\_6," "M10\_7," "M10\_8," "M10\_9," "M10\_10," "M10\_11," "M10\_12," "M11\_1," "M11\_2," "M11\_3," "M11\_4," "M11\_5," "M11\_6," "M11\_7," "M11\_8," "M11\_9," "M11\_10," "M11\_11," "M12\_1," "M12\_2," "M12\_3," "M12\_4," "M12\_5," "M12\_6," "M12\_7," "M12\_8," "M12\_9," "M12\_10," "M12\_11," "M12\_12," "M12\_13," "M12\_14," "M12\_15," "M12\_16," "M12\_17," "M12\_18," "M13\_1," "M13\_2," "M13\_3," "M13\_4," "M13\_5," "M13\_6," "M13\_7," "M13\_8," "M13\_9," "M13\_10," "M13\_11," "M13\_12," "M13\_13," "M13\_14," "M13\_15," "M14\_1," "M14\_2," "M14\_3," "M14\_4," "M14\_5," "M14\_6," "M14\_7," "M14\_8," "M14\_9," "M14\_10," "M14\_11," "M14\_12," "M14\_13," "M15\_1," "M15\_2," "M15\_3," "M15\_4," "M15\_5," "M15\_6," "M15\_7," "M15\_8," "M15\_9," "M15\_10," "M15\_11," "M15\_12," "M15\_13," "M15\_14," "M15\_15," "M15\_16," "M15\_17," "M15\_18," "M16\_1," "M16\_2," "M16\_3," "M16\_4," "M16\_5," "M16\_6," "M16\_7," "M16\_8," "M16\_9," "M16\_10," "M16\_11," "M16\_12," "M16\_13," "M16\_14," "M16\_15," "M16\_16"



“ M,” “ M”  
4.163950202,2.664206569,9.16657351402678,2.560654106,2.627497328,4.09408399555209,  
0.468020305,4.054029194,3.081305216,2.421204981,4.696604661,3.040551914,3.45588083  
9,18.19503813,3.192240995,3.604275314,5.06168054,2.474222097,2.433797365,2.5127174,  
3.57673306,2.225920843,2.607449425,2.549510632,2.566772044,2.788784104,4.175596145,  
3.101971764,2.679479106,2.618433946,5.327986105,"Y," " Y," " Y," " Y," " Y,"  
“ Y,”  
“ Y,” “ Y,” “ Y,” “ Y,” “ Y,” “ Y,” “ Y,” “ Y,” “ Y,” “ Y,” “ Y,” “ Y,” “ Y,”  
“ Y,” “ Y,” “ Y,” “ Y,” “ Y,” “ Y,” “ Y,” “ Y,” “ Y,” “ Y,” “ Y,” “ Y,” “ Y,”  
“ Y,” “ Y,” “ Y,” “ Y,” “ Y,” “ Y,” “ Y,” “ Y,” “ Y,” “ Y,” “ Y,” “ Y,” “ Y,”  
“ Y,” “ Y,” “ Y,” “ Y,” “ Y,” “ Y,” “ Y,” “ Y,” “ Y,” “ Y,” “ Y,” “ Y,” “ Y,”  
“ Y,” “ Y,” “ Y,” “ Y,” “ Y,” “ Y,” “ Y,” “ Y,” “ Y,” “ Y,” “ Y,” “ Y,” “ Y,”  
“ Y,” “ Y,” “ Y,” “ Y,” “ Y,” “ Y,” “ Y,” “ Y,” “ Y,” “ Y,” “ Y,” “ Y,” “ Y,”  
“ Y,” “ Y,” “ Y,” “ Y,” “ Y,” “ Y,” “ Y,” “ Y,” “ Y,” “ Y,” “ Y,” “ Y,” “ Y,”  
“ Y,” “ Y,” “ Y,” “ Y,” “ Y,” “ Y,” “ Y,” “ Y,” “ Y,” “ Y,” “ Y,” “ Y,” “ Y,”  
“ Y,” “ Y,” “ Y,” “ Y,” “ Y,” “ Y,” “ Y,” “ Y,” “ Y,” “ Y,” “ Y,” “ Y,” “ Y,”  
“ Y,” “ Y,” “ Y,” “ Y,” “ Y,” “ Y,” “ Y,” “ Y,” “ Y,” “ Y,” “ Y,” “ Y,” “ Y,”  
“ Y,” “ Y,” “ Y,” “ Y,” “ Y,” “ Y,” “ Y,” “ Y,” “ Y,” “ Y,” “ Y,” “ Y,” “ Y,”  
5.03535,2.772862,8.2647329245936,2.567826,2.506617,3.47215722514403,0.949380165,3.7  
98753,3.230998465,2.895319,4.572897,2.941095,3.51001,13.492813,2.910462339,3.6559785  
99,4.671030389,2.214239504,2.451949025,2.426115093,2.815922178,2.264184251,3.139474  
247,2.407591485,2.687722631,2.871443589,5.668055057,2.891884254,2.667048476,3.35281  
119,5.046853073,"Y," " M," " M," " M," " -," " Y," " M," " M," " M," " M,"  
“ Y,” “ Y,” “ M,” “ M,” “ M,” “ Y,” “ Y,” “ Y,” “ M,” “ M,” “ Y,” “ Y,”  
“ M,” “ Y,”  
“ Y,” “ Y,” “ Y,” “ M,” “ Y,” “ Y,” “ M,” “ M,” “ M,” “ -,” “ Y,” “ M,” “ M,”  
“ Y,” “ M,” “ M,” “ M,” “ M,” “ Y,” “ M,” “ -,” “ M,” “ Y,” “ M,” “ M,”  
“ M,” “ -,” “ Y,” “ M,” “ Y,” “ M,” “ Y,” “ -,” “ Y,” “ -,” “ Y,” “ Y,” “ Y,”  
“ Y,” “ -,” “ Y,” “ Y,” “ Y,” “ Y,” “ M,” “ M,” “ M,” “ -,” “ M,” “ M,” “ M,”  
“ M,” “ M,” “ M,” “ Y,” “ Y,” “ M,” “ Y,” “ Y,” “ Y,” “ M,” “ M,” “ M,”  
“ M,” “ Y,” “ Y,” “ Y,” “ M,” “ M,” “ M,” “ Y,” “ Y,” “ Y,” “ Y,” “ Y,” “ Y,”  
“ M,” “ -,”  
“ M,” “ M,” “ Y,” “ Y,” “ Y,” “ M,”  
“ M,” “ M,” “ M,” “ -,” “ Y,” “ -,” “ Y,” “ Y,” “ Y,” “ -,” “ Y,” “ Y,” “ Y,”

“ Y,” “ Y,” “ Y,” “ Y,” “ -,” “ Y,” “ Y,” “ -,” “ -,” “ Y,” “ Y,” “ Y,” “ M,” “ -  
,” “ Y,” “ Y,” “ -,” “ Y,” “ Y,” “ Y,” “ -,” “ Y,” “ Y,” “ Y,” “ Y,” “ Y,” “ Y,”  
“ Y,” “ Y,” “ M,” “ M”

4.193543,2.80436,12.6739028279979,2.4834,2.794792,4.37142445757884,1.089928058,4.24  
1644,3.269522077,2.455252,4.510859,3.378518,3.665452,17.259176,3.109693603,4.3299416  
24,4.772467558,2.474811804,2.76734863,2.468277026,3.111225224,2.34905559,2.62605365

6,2.645653231,2.626198839,2.765083145,4.74225663,2.99526842,2.63358872,2.784327418,  
6.468614833,"Y," “ Y,” “ Y,” “ M,” “ M,” “ M,” “ M,” “ M,” “ M,” “ Y,” “ Y,”  
“ Y,” “ Y,” “ M,” “ Y,” “ M,”  
“ Y,” “ M,” “ M,” “ M,” “ Y,” “ M,” “ Y,”  
“ Y,” “ Y,” “ Y,” “ M,” “ M,” “ M,” “ M,” “ Y,” “ M,” “ M,” “ M,” “ M,”  
“ M,” “ M,” “ M,” “ M,” “ M,” “ M,” “ M,” “ M,” “ Y,” “ Y,” “ M,” “ M,”  
“ M,” “ M,” “ M,” “ Y,” “ M,” “ Y,”  
“ Y,” “ Y,” “ Y,” “ Y,” “ Y,” “ Y,” “ M,” “ Y,” “ Y,” “ Y,” “ M,” “ M,” “ M,”  
“ M,” “ M,” “ Y,” “ M,” “ M,” “ M,” “ M,” “ Y,” “ Y,” “ M,” “ M,” “ M,”  
“ M,” “ M,” “ M,” “ M,” “ Y,” “ Y,” “ M,” “ Y,” “ Y,” “ M,” “ M,” “ M,”  
“ M,” “ M,” “ M,” “ M,” “ M,” “ M,” “ Y,” “ Y,” “ M,” “ M,” “ M,” “ M,”  
“ Y,” “ Y,” “ Y,” “ M,” “ Y,” “ Y,” “ Y,” “ Y,” “ Y,” “ M,” “ M,” “ M,” “ M,”  
“ M,” “ Y,” “ Y,” “ M,” “ M,” “ M,” “ M,” “ M,” “ M,” “ Y,” “ Y,” “ Y,”  
“ Y,” “ Y,” “ Y,” “ Y,” “ Y,” “ Y,” “ -,” “ M,” “ M,” “ M,” “ M,” “ M,” “ Y,” “ M,”  
“ M,” “ M,” “ M,” “ M,” “ M,” “ Y,” “ Y,” “ Y,” “ -,” “ M,” “ M,” “ M,”  
“ Y,” “ M,” “ M,” “ Y,” “ Y,” “ Y,” “ Y,” “ M,” “ M,” “ M,” “ M,” “ M,”  
“ M,” “ Y,” “ Y,” “ Y,” “ Y,” “ Y,” “ M,” “ M,” “ Y,” “ Y,” “ Y,” “ M,” “ -,” “ Y,”  
“ Y,” “ Y”

11.549927,5.193382,11.2324873128952,6.231838,6.691946,6.85895435932454,1.054834055,  
3.734723,5.710170103,3.954306,4.530062,7.663555,6.508893,20,6.292500902,4.687791794,  
4.647303216,3.021952809,7.656005603,1.816848391,11.63567641,6.601208735,18.2921109  
5,6.313659179,-

1.388073671,5.9463897,4.691109423,4.85520489,2.360369364,4.740802226,20,"Y," “ Y,”  
“ M,” “ M,” “ Y,”  
“ Y,” “ Y,” “ Y,” “ Y,” “ Y,” “ Y,” “ Y,” “ M,” “ Y,” “ Y,” “ Y,” “ M,” “ Y,”  
“ Y,” “ Y,” “ M,” “ M,” “ M,” “ M,” “ M,” “ Y,” “ M,” “ M,” “ M,” “ M,”  
“ Y,” “ M,” “ M,” “ M,” “ M,” “ M,”  
“ M,” “ M,” “ M,” “ M,” “ Y,” “ Y,” “ M,” “ M,” “ Y,” “ M,” “ M,” “ M,”  
“ M,” “ Y,” “ M,” “ M,” “ M,” “ M,” “ M,”  
“ M,” “ Y,” “ M,” “ Y,”  
“ M,” “ Y,” “ Y,” “ Y,” “ M,” “ M,” “ Y,” “ Y,” “ Y,” “ Y,” “ Y,” “ M,” “ M,”  
“ M,” “ Y,” “ Y,” “ Y,” “ Y,” “ Y,” “ M,” “ M,” “ M,” “ M,” “ Y,” “ Y,” “ Y,” “ Y,”

“ Y,” “ Y,” “ M,” “ Y,” “ M,”  
“ M,” “ M,” “ M,” “ Y,” “ Y,” “ Y,” “ M,” “ M,” “ Y,” “ M,” “ M,” “ M,”  
“ M,” “ Y,” “ Y,” “ -,” “ Y,” “ Y,” “ Y,” “ Y,” “ Y,” “ Y,” “ M,” “ M,” “ M,”  
“ M,” “ M,” “ M,” “ M,” “ M,” “ M,” “ M,” “ M,” “ M,” “ Y,” “ Y,” “ M,”  
“ M,” “ M,” “ -,” “ M,” “ Y,” “ Y,”  
“ Y,” “ Y,” “ Y,” “ M,” “ M,” “ Y,”  
“ Y,” “ Y,” “ Y,” “ Y,” “ Y,” “ Y,” “ Y,” “ Y”

10.513278,4.616259,11.4710947537467,7.416782,5.521925,6.44087958573326,1.034865293,  
3.584496,7.293567432,4.436076,4.942593,7.278526,4.862121,14.674561,6.689073529,5.925  
627035,6.687055627,4.472891485,6.843321899,4.673491187,12.99040834,5.525075494,10.2  
7272767,6.689347536,0.924319592,6.510404531,8.5439844,6.686406459,4.377433656,5.436

672539,13.96233099,"Y," “ Y,” “ -,” “ Y,” “ -,” “ Y,” “ Y,” “ Y,” “ Y,” “ M,”  
“ M,” “ M,” “ M,” “ M,” “ M,” “ M,” “ M,” “ Y,” “ M,” “ M,” “ M,” “ M,”  
“ M,” “ M,” “ M,” “ M,” “ -,” “ M,” “ M,” “ M,” “ M,” “ M,” “ Y,” “ Y,”  
“ Y,” “ Y,” “ Y,” “ Y,” “ Y,” “ Y,” “ Y,” “ Y,” “ M,” “ M,” “ Y,” “ M,” “ M,”  
“ Y,” “ Y,” “ Y,” “ M,” “ M,” “ M,” “ M,” “ M,” “ -,” “ Y,” “ M,” “ -,” “ M,”  
“ Y,” “ -,” “ Y,” “ -,” “ M,” “ M,”  
“ M,” “ M,” “ Y,” “ Y,” “ Y,” “ Y,” “ Y,” “ -,” “ Y,” “ -,” “ Y,” “ Y,” “ Y,”  
“ M,” “ M,” “ Y,” “ M,” “ Y,” “ M,”  
“ M,” “ M,” “ Y,” “ Y,” “ Y,” “ M,”  
“ M,” “ M,” “ Y,” “ Y,” “ Y,” “ M,” “ M,” “ Y,” “ Y,” “ Y,” “ Y,” “ M,” “ Y,”  
“ Y,” “ Y,” “ M,” “ Y,” “ Y,” “ Y,” “ M,” “ M,” “ M,” “ -,” “ Y,” “ Y,” “ Y,”  
“-,” “ M,” “ M,” “ M,” “ Y,” “ Y,” “ M,” “ Y,” “ -,” “ Y,” “ Y,” “ Y,” “ Y,”  
“ Y,” “ -,” “ M,” “ M,” “ M,” “ -,” “ Y,” “ Y,” “ Y,” “ Y,” “ M,” “ M,” “ M,”  
“ M,” “ M,” “ M,” “ M,” “ -,” “ Y,”  
“ Y,” “ Y,” “ Y,” “ Y,” “ M,” “ M,” “ Y,”  
“ Y,” “ M,” “ M,” “ M,” “ Y,” “ Y,” “ M,” “ M,” “ M”

4.124786,2.79658,9.8098670488055,2.683545,2.722785,4.43002844540754,1.175837321,4.4  
10243,3.80463475,2.386624,4.626337,3.092046,3.392827,16.65438,3.381500853,4.27558442  
6,5.040544542,2.617744891,2.673511759,2.641394676,2.679944895,2.283625613,3.2343907  
13,2.595302337,2.50550078,2.917161983,4.465318565,3.425182962,2.689902136,2.8554203

03,4.678084055,"M," “ M,” “ M,” “ M,” “ -,” “ Y,” “ M,” “ Y,” “ Y,” “ Y,”  
“ Y,” “ Y,” “ Y,” “ Y,” “ Y,” “ Y,” “ Y,” “ Y,” “ Y,” “ Y,” “ Y,” “ Y,” “ Y,”  
“ Y,” “ M,” “ M,” “ Y,” “ M,”  
“ Y,” “ Y,” “ M,” “ Y,” “ -,”  
“ Y,” “ Y,” “ Y,” “ Y,” “ M,” “ M,” “ Y,” “ Y,” “ Y,” “ Y,” “ M,” “ Y,” “ M,”  
“-,” “ Y,” “ Y,” “ Y,” “ M,” “ Y,” “ Y,” “ Y,” “ Y,” “ Y,” “ M,” “ M,” “ M,”  
“ Y,” “ Y,” “ Y,” “ Y,” “ M,” “ M,” “ Y,” “ Y,” “ Y,” “ M,” “ Y,” “ Y,” “ M,”

“ M,” “ M,” “ Y,” “ Y,” “ Y,” “ Y,” “ M,” “ M,” “ M,” “ Y,” “ Y,” “ Y,” “ Y,”  
“ Y,” “ Y,” “ Y,” “ Y,” “ Y,” “ Y,” “ Y,” “ Y,” “ Y,” “ Y,” “ Y,” “ Y,” “ Y,”  
“ M,” “ M,” “ M,” “ M,” “ Y,” “ Y,” “ -,” “ M,” “ M,” “ M,” “ Y,” “ Y,” “ Y,”  
“ Y,” “ Y,” “ -,” “ Y,” “ Y,” “ M,” “ M,” “ M,” “ -,” “ M,” “ Y,” “ Y,” “ -,”  
“ Y,” “ Y,” “ Y,” “ M,”  
“ M,” “ -,” “ Y,” “ M,” “ Y,” “ Y,” “ Y,” “ Y,” “ M,” “ M,” “ Y,” “ Y,” “ Y,”  
“ M,” “ M,” “ Y,” “ Y,” “ -,” “ -,” “ Y,” “ Y,” “ Y,” “ Y,” “ M,” “ M,” “ M,”  
“ M,” “ M,” “ -,” “ M,” “ Y,”  
“ Y,” “ M,” “ Y,” “ Y”

4.871242,2.909223,12.7159987056463,2.407389,2.872123,4.12114910192513,0.996763754,4  
.146635,3.378587927,2.442055,4.397572,3.418595,3.59006,6.674424,3.315601761,3.672791

743,4.915571212,2.536860496,2.868474646,2.726532983,3.271551768,2.36937404,3.427444  
562,2.764678131,2.910272797,2.919412684,6.773475103,3.409524511,2.942530017,2.91353

2903,4.783583648,"Y," “ Y,” “ Y,” “ Y,” “ Y,” “ Y,” “ Y,” “ M,” “ M,” “ M,”  
“ Y,” “ M,” “ M,” “ M,”  
“ M,” “ M,” “ Y,” “ Y,” “ Y,” “ Y,” “ Y,” “ Y,” “ M,” “ M,” “ M,” “ Y,” “ Y,”  
“ Y,” “ Y,” “ Y,” “ Y,” “ M,”  
“ M,” “ Y,” “ M,” “ M,” “ M,” “ Y,”  
“ Y,” “ Y,” “ M,” “ Y,” “ Y,” “ M,” “ M,” “ Y,” “ Y,” “ Y,” “ Y,” “ Y,” “ Y,”  
“ Y,” “ Y,” “ Y,” “ Y,” “ Y,” “ Y,” “ Y,” “ Y,” “ Y,” “ Y,” “ Y,” “ Y,”  
“ Y,” “ M,” “ M,” “ Y,” “ M,” “ M,” “ M,” “ M,” “ M,” “ M,” “ Y,” “ Y,” “ Y,”  
“ Y,” “ Y,” “ Y,” “ Y,” “ Y,” “ M,”  
“ M,” “ M,” “ M,” “ M,” “ M,” “ Y,” “ Y,” “ M,” “ Y,” “ Y,” “ Y,” “ Y,” “ -,”  
“ Y,” “ Y,” “ Y,” “ Y,” “ M,” “ -,” “ M,” “ M,” “ M,” “ -,” “ M,” “ M,” “ M,”  
“ M,” “ M,” “ M,” “ Y,” “ Y,” “ M,” “ M,” “ M,” “ M,” “ Y,” “ Y,” “ -,”  
“ M,” “ -,” “ M,” “ M,” “ M,” “ M,” “ M,” “ M,” “ Y,” “ M,” “ Y,” “ M,”  
“ M,” “ M,” “ Y,” “ M,” “ M,” “ M,” “ -,” “ Y,” “ M,” “ M,” “ M,” “ M,”  
“ M,” “ M,” “ M,” “ M,” “ M,” “ Y,” “ -,” “ Y,” “ M,” “ Y,” “ Y,” “ Y,” “ Y,”  
“ Y,” “ Y,” “ Y,” “ Y,” “ Y,” “ Y,” “ Y,” “ M,” “ M,” “ M,” “ M,” “ M”

12.564118,4.878997,10.8605891751981,6.103129,5.016373,6.48574671555664,0.952718676,  
5.033526,6.026399846,3.666035,4.670103,6.489411,6.197166,5.713884,5.448925341,4.2281

05462,9.144678552,4.887042456,5.322494846,3.964444268,8.79996032,4.87833884,12.7533  
791,5.180714392,2.894843878,5.402012896,9.678769665,4.77429306,4.742846726,4.295097

337,20,"Y," “ M,” “ M,” “ M,” “ Y,” “ Y,” “ Y,” “ Y,” “ Y,” “ M,” “ M,” “ M,”  
“ Y,” “ Y,” “ Y,” “ Y,” “ M,” “ M,” “ Y,” “ Y,” “ Y,” “ Y,” “ Y,” “ M,” “ M,”  
“ M,” “ M,” “ Y,” “ M,” “ M,” “ Y,”  
“ M,”  
“ M,” “ M,” “ M,” “ M,” “ -,” “ M,” “ M,” “ Y,” “ M,” “ M,” “ M,” “ Y,”

“ Y,” “ Y,” “ Y,” “ Y,” “ M,” “ M,” “ M,” “ Y,” “ Y,” “ Y,” “ M,” “ M,”  
“ M,” “ M,” “ M,” “ M,” “ Y,” “ M,”  
“ M,” “ M,” “ M,” “ M,” “ M,” “ Y,” “ Y,” “ Y,” “ Y,” “ M,” “ M,” “ Y,”  
“ Y,” “ Y,” “ Y,” “ Y,” “ Y,” “ Y,” “ Y,” “ M,” “ M,” “ M,” “ Y,” “ Y,” “ M,”  
“ M,” “ M,” “ Y,” “ Y,” “ Y,” “ M,” “ M,” “ Y,” “ Y,” “ Y,” “ M,” “ M,” “ -,”  
“ Y,” “ Y,” “ Y,” “ Y,” “ M,” “ -,” “ -,” “ M,” “ M,” “ -,” “ M,” “ Y,” “ M,”  
“ M,” “ M,” “ -,” “ Y,” “ Y,” “ Y,” “ Y,” “ M,” “ M,” “ M,” “ M,” “ Y,” “ Y,”  
“ Y,” “ M,” “ Y,” “ Y,”  
“ Y,” “ Y,” “ M,”  
“ M,” “ M,” “ M,” “ M,” “ -,” “ M,”  
“ M,” “ M,” “ M,” “ M,” “ M,” “ M,” “ Y,” “ M,” “ M,” “ M,” “ M,” “ M”

10.928629,5.660739,11.5408966435375,7.21266,5.157394,5.90573660336292,0.899207248,6  
.255029,6.443355484,3.575135,4.758675,6.044304,7.429179,7.215827,5.893762662,5.27817  
8827,7.436126793,4.212819539,4.497848596,3.690866667,11.9305946,4.737398972,20,5.30  
1712244,3.832555745,5.800077756,10.15021572,6.147148353,4.433988425,5.877021918,10.

52554495,"Y," “ Y,” “ Y,” “ Y,” “ Y,” “ Y,” “ Y,” “ M,” “ M,” “ M,” “ M,”  
“ M,” “ M,” “ M,” “ M,” “ M,” “ M,” “ M,” “ M,” “ Y,” “ Y,” “ Y,” “ Y,”  
“ Y,” “ M,” “ Y,” “ Y,” “ Y,” “ Y,” “ Y,” “ Y,” “ M,” “ M,” “ M,” “ M,” “ -,”  
“ M,” “ Y,” “ Y,” “ Y,” “ M,” “ M,” “ M,” “ M,” “ M,” “ Y,” “ Y,” “ Y,”  
“ Y,” “ Y,” “ Y,” “ Y,” “ Y,” “ Y,” “ Y,” “ Y,” “ M,” “ M,” “ M,” “ M,” “ M,”  
“ M,” “ M,” “ M,” “ M,” “ M,” “ M,” “ Y,” “ M,” “ M,” “ M,” “ Y,” “ Y,”  
“ M,” “ M,” “ M,” “ M,” “ M,” “ Y,” “ M,” “ M,” “ M,” “ M,” “ M,” “ M,”  
“ M,” “ M,” “ M,” “ Y,” “ M,” “ M,” “ M,” “ M,” “ Y,” “ M,” “ Y,” “ Y,”  
“ Y,” “ Y,” “ Y,” “ Y,” “ M,” “ M,” “ M,” “ M,” “ Y,” “ Y,” “ M,” “ M,”  
“ M,” “ M,” “ M,” “ M,” “ M,” “ M,” “ M,” “ M,” “ M,” “ M,” “ Y,” “ Y,”  
“ Y,” “ Y,” “ -,” “ Y,” “ Y,” “ Y,” “ Y,” “ M,” “ M,” “ M,” “ M,” “ M,” “ -,”  
“ M,” “ M,” “ Y,” “ Y,” “ Y,” “ -,” “ Y,”  
“ M,” “ M,” “ M,” “ Y,” “ Y,” “ Y,” “ Y,” “ M,” “ M,” “ M,” “ M,” “ M,”  
“ M,” “ M,” “ M,” “ M,” “ M,” “ M,” “ M,” “ M,” “ Y,” “ M,” “ M,” “ M,”  
“ Y,” “ M,” “ M,” “ M,” “ M,” “ Y,” “ Y,” “ Y,” “ -,” “ Y,” “ Y,” “ M,” “ M,”  
“ M,” “ Y,” “ Y,” “ Y,” “ M,” “ M,” “ M,” “ M,” “ Y,” “ Y,” “ Y,” “ M,”  
“ M,” “ M”

3.182065,2.822964,12.2824789283076,2.677541,2.954078,3.3951856099753,0.816779171,4.  
217584,3.100237386,2.923183,4.204801,3.5726,3.380291,3.766752,3.472178896,3.2714338,  
5.206082999,2.610241652,2.489770275,2.682641882,2.963271813,2.487696153,3.26181041  
8,2.856470904,2.683980003,3.163621352,5.363577889,3.408153821,2.852860521,3.0183875

37,6.126464617,"Y," “ M,” “ -,” “ Y,” “ -,” “ M,” “ M,” “ M,” “ M,” “ M,”  
“ M,” “ M,” “ Y,” “ -,” “ M,” “ M,”

“ Y,” “ Y,” “ Y,” “ M,” “ M,” “ M,” “ Y,” “ Y,” “ M,” “ M,” “ M,” “ Y,”  
“ Y,” “ Y,” “ Y,” “ Y,” “ Y,” “ Y,” “ M,” “ M,” “ M,” “ M,” “ M,” “ M,”  
“ M,” “ Y,” “ Y,” “ Y,” “ Y,” “ Y,” “ -,” “ Y,” “ Y,” “ M,” “ M,” “ M,” “ M,”  
“ Y,” “ Y,” “ M,” “ M,” “ Y,” “ Y,” “ M,” “ M,” “ M,” “ M,” “ Y,” “ -,” “ Y,”  
“ Y,” “ Y,” “ Y,” “ Y,” “ Y,” “ Y,” “ Y,” “ M,” “ M,” “ Y,” “ M,” “ M,” “ M,”  
“ M,” “ M,” “ M,” “ Y,” “ Y,” “ M,” “ M,” “ Y,” “ Y,” “ Y,” “ M,” “ M,”  
“ M,” “ Y,” “ Y,” “ Y,” “ Y,” “ Y,” “ M,” “ M,” “ M,” “ M,” “ Y,” “ M,”  
“ M,” “ M,” “ M,” “ M,” “ M,” “ M,” “ Y,” “ Y,” “ Y,” “ Y,” “ Y,” “ M,”  
“ M,” “ Y,” “ -,” “ Y,” “ Y,” “ Y,” “ M,” “ M,” “ M,” “ Y,” “ Y,” “ Y,” “ -,”  
“ Y,” “ Y,” “ Y,” “ Y,” “ M,” “ -,” “ Y,” “ Y,” “ Y,” “ M,” “ M,” “ M,” “ M,”  
“ M,” “ M,” “ M,” “ M,” “ M,” “ M,” “ M,” “ M,” “ M,” “ M,” “ M,” “ M,”  
“ Y,” “ Y,” “ Y,” “ Y,” “ Y,” “ M,” “ M,” “ M,” “ M,” “ Y,” “ Y,” “ M,”  
“ M,” “ M,” “ M,” “ M,” “ M,” “ M,” “ M,” “ Y,” “ -,” “ Y,” “ M,” “ M,”  
“ M,” “ M,” “ M,” “ M,” “ M,” “ M,” “ M,” “ M,” “ M,” “ M,” “ M,” “ M,”  
“ Y,” “ Y,” “ M”

7.608856,5.81584,11.7910298236839,8.96929,5.887541,5.41451565493507,0.972651605,5.1  
11531,6.436502122,3.950344,5.509514,6.268952,6.60832,9.728075,5.565168259,4.36079771  
,9.510268236,4.508477333,5.669886677,4.482201802,9.40539739,5.368780938,11.57858984  
,5.60928528,3.63139602,5.376556723,9.769241854,6.382505729,5.363665896,6.168114945,  
10.17481684,-,” “ M,” “ -,” “ M,” “ -,” “ M,” “ Y,” “ Y,” “ Y,” “ Y,” “ Y,”  
“ Y,” “ Y,” “ -,” “ M,” “ M,” “ M,” “ M,” “ Y,” “ Y,” “ M,” “ M,” “ M,” “ Y,”  
“ M,” “ -,”  
“ M,” “ -,” “ M,”  
“ M,” “ M,” “ M,” “ M,” “ M,” “ Y,”  
“ M,” “ Y,” “ M,” “ M,” “ M,” “ M,”  
“ M,” “ M,” “ M,” “ M,” “ M,” “ M,” “ Y,” “ M,” “ M,” “ M,” “ M,” “ M,”  
“ M,” “ Y,” “ Y,” “ Y,” “ M,” “ Y,” “ Y,” “ Y,” “ Y,” “ M,” “ M,” “ Y,” “ Y,”  
“ Y,” “ Y,” “ Y,” “ Y,” “ Y,” “ Y,” “ Y,” “ Y,” “ M,” “ M,” “ Y,” “ Y,” “ Y,”  
“ Y,” “ Y,” “ Y,” “ Y,” “ M,” “ M,” “ Y,” “ M,” “ M,” “ Y,” “ -,” “ Y,” “ Y,”  
“ Y,” “ M,” “ Y,”  
“ M,” “ M,” “ Y,” “ Y,” “ Y,” “ Y,” “ M,” “ -,” “ M,” “ M,” “ M,” “ M,” “ Y,”  
“ Y,” “ Y,” “ Y,” “ M,” “ M,” “ M,” “ -,” “ M,” “ M,” “ M,” “ M,” “ M,”  
“ Y,”  
“ M,” “ Y,” “ M,” “ M,” “ M”

10.722076,6.227652,10.0636144620266,7.922266,6.011876,5.43184592086438,0.77752809,2  
.864341,6.041915235,5.399974,5.781706,9.645108,7.147987,8.610478,5.859658837,4.72054  
5853,8.779942292,6.273320327,7.980292081,4.855119956,10.11172004,6.417683262,5.1154



24613,6.131949686,4.410493662,6.225523865,6.548248881,5.877377702,5.054338039,5.204

385798,4.175826954,"M," " M," " M," " M," " M," " Y," " Y," " Y," " Y," " Y,"  
" Y," " Y," " Y," " Y," " Y," " Y," " Y," " M," " M," " M," " M," " M,"  
" M," " M," " Y," " Y," " Y," " Y," " Y," " Y," " M," " M," " M," " M,"  
" M," " -, " Y,"  
" Y," " Y," " M," " Y," " M," " M,"  
" M," " M," " M," " Y," " Y," " Y," " Y," " Y," " Y," " M," " M," " M,"  
" M," " M," " M," " M," " M," " M," " M," " M," " M," " M," " M," " M,"  
" M," " M," " Y," " Y," " Y," " M," " M," " M," " M," " M," " M," " Y," " Y,"  
" M," " M," " M," " M," " M," " M," " Y," " Y," " Y," " Y," " M," " M,"  
" Y," " Y," " Y," " Y," " M," " M," " Y," " Y," " Y," " Y," " M," " M,"  
" M," " M," " M," " M," " Y," " Y," " M," " M," " M," " M," " M," " M,"  
" M," " M," " M," " M"

9.841678,6.525282,14.2240472079508,10.514725,5.937688,5.68993799408643,1.017105263,  
6.033762,7.118730019,3.500569,5.099372,7.380805,6.450457,8.324565,5.752337941,4.9501  
54743,10.3860024,5.143828975,5.414408759,4.669772899,10.98955508,5.73048025,20,5.94  
6707872,3.954019134,5.833095171,9.615143383,6.453547935,4.331654648,4.337930822,20,

"Y," " Y," " Y," " Y," " -, " M," " M," " M," " Y," " Y," " Y," " Y," " M,"  
" M," " M," " M," " M," " -, " M," " -, " M," " M," " M," " M," " Y," " Y,"  
" Y," " M," " M," " M," " M," " M," " Y," " Y," " M," " M," " Y," " Y,"  
" Y," " Y," " Y," " Y," " Y," " Y," " Y," " Y," " Y," " M," " M," " M," " M,"  
" M," " M," " M," " M," " M," " M," " Y," " Y," " Y," " M," " M," " M,"  
" M," " M," " M," " M," " Y," " Y," " Y," " Y," " Y," " M," " M," " M,"  
" M," " M," " M," " M," " M," " M," " M," " Y," " M," " -, " Y," " Y,"  
" Y," " M," " M," " M," " M," " M," " M," " Y," " Y," " Y," " Y," " Y,"  
" Y," " Y," " M," " M," " M," " M," " M," " Y," " M," " Y," " Y," " Y,"  
" Y," " Y," " Y," " Y," " Y," " M," " M," " Y," " M," " M," " M," " M,"  
" M," " M," " M," " M," " M," " M," " Y," " Y," " Y," " Y," " -, " Y," " Y,"  
" M," " M," " Y," " Y," " M,"  
" M," " Y," " Y," " M,"  
" M," " M," " M," " M," " M," " M," " M," " -, " Y," " Y," " M," " M,"  
" M," " M," " M," " M," " M," " M," " Y," " Y," " Y," " Y," " M," " Y,"  
" Y," " Y," " M," " M,"

“ M,” “ M”  
4.228393,3.232764,12.5090403409081,2.76805,2.984201,3.93294536751025,0.962888666,4.  
183017,3.215745118,2.519431,5.367191,3.076374,3.322358,7.505502,3.571313774,3.912809  
494,4.905896361,2.507101641,2.660493669,2.463893481,3.065865716,2.603744773,5.24324  
7383,2.756659546,2.70422064,2.999966115,5.609291273,3.488516031,2.920656835,3.69990  
0747,12.18571303,"Y," “ Y,” “ M,” “ M,” “ M,” “ M,” “ Y,” “ Y,” “ Y,” “ M,”  
“ M,” “ M,” “ M,” “ M,” “ M,” “ M,” “ Y,” “ M,” “ M,” “ M,” “ M,” “ M,”  
“ M,” “ -,” “ M,” “ M,” “ M,” “ M,” “ M,” “ M,” “ Y,” “ Y,” “ Y,” “ M,”  
“ M,” “ M,” “ M,” “ Y,” “ -,”  
“ Y,” “ M,” “ M,” “ M,” “ Y,”  
“ Y,” “ Y,” “ Y,” “ Y,” “ Y,” “ Y,” “ M,” “ M,” “ Y,” “ Y,” “ Y,” “ Y,” “ Y,”  
“-,” “ -,” “ M,” “ Y,” “ Y,” “ Y,” “ M,” “ M,” “ Y,” “ Y,” “ M,” “ M,” “ M,”  
“ M,” “ M,” “ Y,” “ M,” “ M,” “ M,”  
“ M,” “ Y,” “ M,”  
“ Y,” “ Y,” “ Y,” “ Y,” “ Y,” “ M,” “ Y,”  
“ Y,” “ Y,” “ Y,” “ Y,” “ M,” “ M,” “ M,” “ M,” “ Y,” “ Y,” “ Y,” “ Y,” “ Y,”  
“ M,” “ Y,” “ M,” “ M,” “ M,” “ Y,” “ M,”  
“ M,” “ Y,” “ M,” “ M,”  
“ M,” “ M,” “ M,” “ M,” “ M,” “ M,” “ M,” “ M,” “ Y,” “ Y,” “ Y,” “ Y,”  
“ Y,” “ Y,” “ Y,” “ M,” “ M,” “ M,” “ Y,” “ Y,” “ M,” “ Y,” “ M,” “ M,”  
“ M,” “ M,” “ M,” “ M,” “ M,” “ M,” “ M,” “ M,” “ M,” “ Y,” “ Y,” “ M”  
10.403313,7.233001,14.3773424783689,8.213875,7.110387,6.77456745952772,0.856401384,  
5.617222,12.32389864,4.910849,7.057889,10.602345,8.167824,20,8.980447538,7.986294896  
,4.92049986,5.991528632,7.609345048,5.058115934,11.96002221,7.645740546,13.32129352  
,7.833684371,4.954057166,6.818259391,8.150182184,5.855245507,5.05518345,5.26233467,  
20,"Y," “ Y,” “ M,” “ M,” “ Y,” “ Y,” “ Y,”  
“ Y,” “ Y,” “ M,” “ Y,” “ Y,”  
“ Y,” “ M,” “ Y,” “ M,”  
“ M,” “ Y,” “ Y,” “ Y,” “ M,” “ Y,”  
“-,” “ Y,” “ Y,” “ Y,” “ Y,” “ Y,” “ M,” “ Y,” “ M,” “ M,” “ Y,” “ Y,” “ M,”  
“ Y,” “ M,” “ Y,” “ Y,” “ M,”  
“ M,” “ M,” “ Y,” “ M,” “ Y,” “ -,” “ Y,” “ Y,” “ M,” “ -,” “ Y,” “ Y,” “ Y,”  
“ M,” “ Y,” “ Y,” “ Y,”  
“ Y,” “ Y,” “ M,” “ Y,” “ M,”  
“ M,” “ Y,” “ M,” “ Y,” “ M,” “ M,” “ M,”  
“ M,” “ M,” “ M,” “ M,” “ M,” “ M,” “ M,” “ M,” “ -,” “ Y,” “ M,” “ M,”  
“ Y,” “ M,” “ M,” “ Y,” “ M,” “ M,” “ Y,” “ Y,” “ Y,” “ Y,” “ M,” “ M,”  
“ M,” “ Y,” “ Y,” “ Y,” “ Y,” “ Y,” “ M,” “ M,” “ M,” “ Y,” “ Y,” “ Y,” “ Y,”

“ Y,” “ Y,” “ Y,” “ Y,” “ M,” “ M,” “ Y,” “ Y,” “ Y,” “ Y,” “ M,” “ M,” “ M,”  
“ M,” “ M,” “ M,” “ -,” “ M,” “ M,” “ M,” “ Y,” “ Y,” “ Y,” “ M,” “ M,”  
“ Y,” “ M,” “ M,” “ Y”

8.720345,2.871607,9.17829103203222,5.013759,4.69989,5.38041740597378,1.010043042,1.  
414305,7.165977113,4.597306,6.229972,5.425715,4.709345,4.479276,3.979283368,4.832632  
26,4.17863137,5.800524245,9.673608038,4.155245529,7.487515031,4.647615882,8.7523842  
92,6.527661445,2.141263145,4.40926169,4.334743213,4.268702173,3.43362196,5.93066266

1,3.925648939,"M," “ M,” “ M,” “ Y,”  
“ Y,” “ Y,” “ Y,” “ Y,” “ Y,” “ Y,” “ Y,” “ Y,” “ Y,” “ Y,” “ Y,” “ Y,” “ Y,”  
“ M,” “ Y,” “ Y,” “ Y,” “ Y,” “ Y,”  
“ Y,” “ Y,” “ Y,” “ Y,” “ Y,” “ Y,” “ Y,” “ M,” “ M,” “ M,” “ M,” “ M,”  
“ M,” “ M,” “ M,” “ M,” “ M,” “ M,” “ -,” “ M,” “ M,” “ Y,” “ M,” “ M,”  
“ Y,” “ Y,” “ Y,” “ Y,” “ M,” “ M,” “ M,” “ Y,” “ Y,” “ M,” “ M,” “ M,”  
“ M,” “ M,” “ Y,” “ Y,” “ Y,” “ M,” “ Y,”  
“ M,” “ M,” “ M,” “ M,” “ M,” “ Y,” “ Y,” “ Y,” “ Y,” “ M,” “ M,” “ M,”  
“ M,” “ Y,” “ -,” “ Y,” “ Y,” “ Y,” “ M,” “ M,” “ M,” “ M,” “ M,” “ M,”  
“ M,” “ M,” “ Y,” “ M,” “ M,” “ M,” “ -,” “ Y,” “ Y,” “ Y,” “ Y,” “ Y,” “ M,”  
“ M,” “ M,” “ M,” “ M,” “ Y,” “ M,” “ M,” “ M,” “ Y,” “ Y,” “ Y,” “ Y,”  
“ Y,” “ Y,” “ Y,” “ Y,” “ Y,” “ Y,” “ Y,” “ Y,” “ -,” “ Y,” “ Y,” “ M,” “ M,”  
“ M,” “ M,” “ M,” “ M,” “ M,” “ Y,” “ Y,” “ Y,” “ -,” “ Y,” “ Y,” “ M,” “ M,”  
“ Y,” “ Y,” “ Y,” “ Y,” “ M,” “ M,” “ Y,”  
“ Y”

12.086435,7.051785,10.322771752214,13.805613,7.731265,5.45519881953567,0.843076923,  
6.433513,11.06629743,5.679467,7.307987,11.005608,5.462696,20,7.891439531,6.733534779  
,1.459157952,8.301992022,4.317585267,6.577077422,18.17976954,8.076614077,20,9.07441  
9027,3.302807492,7.571507512,8.214422246,8.416302157,5.947410259,6.386250975,20,"Y,

” “ Y,” “ -,” “ Y,” “ -,” “ M,” “ M,” “ M,” “ M,” “ -,” “ M,” “ M,” “ M,”  
“ M,” “ M,” “ M,” “ M,” “ Y,” “ M,” “ M,” “ M,” “ M,” “ Y,” “ Y,” “ Y,”  
“ M,” “ Y,” “ -,” “ M,”  
“ M,” “ M,” “ M,” “ M,” “ M,” “ M,” “ M,” “ M,” “ M,” “ M,” “ Y,” “ Y,”  
“ M,” “ M,” “ M,” “ M,” “ M,” “ -,” “ Y,” “ Y,” “ M,” “ M,” “ M,” “ Y,”  
“ Y,” “ Y,” “ Y,” “ Y,” “ Y,” “ M,”  
“ M,” “ M,” “ M,” “ M,” “ M,” “ M,” “ Y,” “ Y,” “ Y,” “ M,” “ M,” “ M,”  
“ Y,” “ M,”  
“ M,” “ M,” “ M,” “ M,” “ Y,”  
“ Y,” “ Y,” “ Y,” “ Y,” “ Y,” “ M,” “ M,” “ Y,” “ Y,” “ M,” “ M,” “ M,”

“ M,” “ M,” “ M,” “ M,” “ M,” “ M,” “ M,” “ Y,” “ Y,” “ Y,” “ -,” “ Y,” “ Y,”  
“ M,” “ M,” “ M,” “ M,” “ M,” “ M,” “ Y,” “ Y,” “ Y,” “ Y,” “ M,” “ Y,”  
“ Y,” “ Y,” “ Y,” “ -,” “ M,” “ M,” “ Y,”  
“ Y,” “ M,” “ M,” “ M,” “ M,” “ M,” “ -,” “ Y,” “ Y,” “ Y,” “ Y,” “ Y,” “ Y,”  
“ Y,” “ Y,” “ Y,” “ Y,” “ Y,” “ -,” “ Y,” “ Y,” “ M,” “ Y,” “ Y,” “ Y,” “ Y,”  
“ Y,” “ Y,” “ Y,” “ Y,” “ Y,” “ Y,” “ Y,” “ Y,” “ Y,” “ Y,” “ M”

3.829492,2.978735,10.4488696070513,2.50229,2.875207,3.90994860862843,0.834503511,4.  
180988,6.922825636,2.686009,4.563207,3.884774,3.306858,9.299485,3.243235194,4.225875  
002,4.780592819,2.374740239,3.600694928,2.553776582,2.997165763,2.24489575,2.947615  
318,2.711286725,2.674857187,2.943484449,4.744210867,2.875193126,2.613705093,3.37157

2013,4.887979833,"Y," “ Y,” “ -,” “ Y,” “ M,” “ M,” “ M,” “ Y,” “ Y,” “ Y,”  
“ Y,” “ Y,” “ Y,” “ Y,” “ Y,” “ M,”  
“ Y,” “ M,” “ M,”  
“ Y,” “ Y,” “ Y,” “ Y,” “ Y,” “ M,” “ Y,”  
“ M,” “ -,” “ M,” “ M,” “ M,” “ Y,”  
“ Y,” “ Y,” “ M,” “ M,” “ M,” “ Y,” “ Y,” “ Y,” “ M,” “ Y,” “ Y,” “ Y,” “ Y,”  
“ Y,” “ Y,” “ Y,” “ Y,” “ M,” “ M,” “ M,” “ Y,” “ Y,” “ M,” “ M,” “ M,”  
“ M,” “ M,” “ M,” “ M,” “ Y,” “ Y,” “ Y,” “ Y,” “ M,” “ M,” “ M,” “ M,”  
“ M,” “ Y,” “ M,” “ M,” “ M,” “ Y,” “ Y,” “ M,” “ M,” “ Y,” “ Y,” “ Y,”  
“ Y,” “ Y,” “ Y,” “ Y,” “ M,” “ M,” “ M,” “ M,” “ M,” “ M,” “ Y,” “ M,” “ Y,”  
“ Y,” “ Y,” “ Y,” “ -,” “ Y,” “ M,” “ M,”  
“ Y,” “ M,” “ M,” “ M,” “ Y,” “ Y,” “ -,” “ Y,” “ Y,” “ Y,” “ Y,” “ Y,” “ Y,”  
“ Y,” “ Y,” “ Y,” “ Y,” “ M,” “ Y,” “ Y,” “ Y,” “ M,” “ -,” “ M,” “ M,” “ M,”  
“ M,” “ Y,” “ Y,” “ M,” “ M,” “ M,” “ M,” “ -,” “ Y,” “ Y,” “ Y,” “ M,” “ M,”  
“ M,” “ M,” “ M,” “ M,” “ M,” “ M,” “ M,” “ M,” “ M,” “ M,” “ Y,” “ Y,”  
“ Y,” “ Y,” “ M,” “ M,” “ Y,” “ Y,” “ M,” “ Y,” “ Y,” “ Y,” “ Y,” “ Y,” “ Y,”  
“ Y”

4.724958,3.108565,13.1404931996653,2.963525,2.916732,4.39808599085516,0.801136364,3  
.922561,5.83257039,2.858628,5.595038,3.776813,4.064097,4.622564,3.896924945,3.612743  
431,5.799334164,2.702767034,2.905161646,2.836546676,3.285025887,2.738891393,3.99985  
6696,3.02806997,2.989136876,3.439047538,6.538453115,3.71566794,3.210605061,3.132626

757,7.697233071,"M," “ M,” “ M,” “ M,” “ -,” “ Y,” “ M,” “ M,” “ M,” “ M,”  
“ Y,” “ Y,” “ M,” “ M,” “ M,” “ M,” “ M,” “ M,” “ Y,” “ Y,” “ Y,” “ Y,”  
“ Y,” “ Y,” “ M,” “ Y,” “ M,”  
“ M,” “ Y,”  
“ Y,” “ M,” “ M,” “ M,” “ Y,” “ Y,” “ M,” “ M,” “ Y,” “ M,” “ Y,” “ Y,”  
“ Y,” “ Y,” “ M,” “ Y,” “ Y,” “ Y,” “ Y,” “ Y,” “ M,” “ Y,” “ Y,” “ Y,” “ Y,” “ Y,”  
“ Y,” “ Y,” “ -,” “ M,” “ Y,” “ Y,” “ -,” “ M,” “ M,” “ Y,” “ Y,” “ Y,” “ Y,”

“ Y,” “ M,” “ M,” “ Y,” “ Y,” “ Y,” “ Y,” “ M,” “ M,” “ M,” “ Y,” “ Y,”  
“ M,” “ M,” “ M,” “ Y,” “ M,” “ M,”  
“ M,” “ M,” “ M,” “ M,” “ M,” “ M,” “ M,” “ M,” “ M,” “ Y,” “ Y,” “ M,”  
“ M,” “ M,” “ M,” “ M,” “ M,” “ M,” “ M,” “ M,” “ M,” “ M,” “ M,” “ -,” “ -  
,” “ M,” “ Y,” “ Y,” “ Y,” “ Y,”  
“ M,” “ M,” “ M,” “ Y,” “ Y,” “ M,” “ M,” “ M,” “ Y,” “ Y,” “ Y,” “ Y,”  
“ Y,” “ Y,” “ Y,” “ Y,” “ Y,” “ Y,” “ M,” “ M,” “ M,” “ Y,” “ Y,” “ M,” “ M,”  
“ M,” “ M,” “ M,” “ M,” “ M,” “ M,” “ M,” “ M,” “ M,” “ M,” “ M,” “ M,”  
“ Y,” “ Y,” “ Y,” “ M,” “ M,” “ M,” “ M,” “ M,” “ M,” “ Y,” “ Y,” “ Y,”  
“ Y,” “ M,” “ M”

8.640929,8.878373,9.78134714283352,15.466519,7.962254,7.80521140578864,1.036895674,  
8.528035,12.98498665,2.948095,5.349448,9.725971,10.306587,20,9.664653483,4.649922762  
,3.981308797,5.721463648,4.927082602,7.263585432,11.15413463,9.823973519,8.42689166  
9,9.560973235,3.514244112,8.348030074,10.75701855,8.046094216,8.198766777,10.542670  
67,20,"M," “ M,” “ M,” “ M,” “ Y,”  
“ Y,” “ Y,” “ M,” “ Y,” “ Y,” “ Y,” “ Y,” “ Y,” “ M,” “ M,” “ M,” “ M,” “ Y,”  
“ Y,” “ Y,” “ Y,” “ Y,” “ Y,” “ M,” “ M,” “ M,” “ M,” “ M,” “ -,” “ M,” “ M,”  
“ M,” “ M,” “ M,” “ M,” “ Y,” “ Y,” “ Y,” “ Y,” “ M,” “ Y,” “ Y,” “ Y,” “ Y,”  
“ Y,” “ Y,” “ Y,” “ Y,” “ Y,” “ Y,” “ Y,” “ M,” “ M,” “ M,” “ M,” “ Y,” “ Y,”  
“ Y,” “ Y,” “ Y,” “ Y,” “ Y,” “ Y,” “ Y,” “ M,” “ M,” “ M,” “ M,” “ M,” “ M,”  
“ M,” “ M,” “ M,” “ M,” “ M,” “ M,” “ M,” “ M,” “ M,” “ Y,” “ Y,” “ M,”  
“ M,” “ M,” “ Y,” “ Y,” “ Y,” “ Y,” “ Y,” “ M,” “ M,” “ M,” “ M,” “ M,” “ M,”  
“ M,” “ M,” “ M,” “ M,” “ M,” “ M,” “ M,” “ M,” “ M,” “ M,” “ M,” “ M,”  
“ Y,” “ Y,” “ Y,” “ M,” “ M,” “ M,” “ Y,” “ Y,” “ Y,” “ M,” “ M,” “ M,”  
“ M,” “ M,” “ M,” “ Y,” “ Y,” “ Y,” “ Y,” “ M,” “ -,” “ -,” “ Y,” “ Y,” “ M,”  
“ M,” “ M,” “ M,” “ -,” “ M,”  
“ M,” “ M,” “ M,” “ M,” “ Y,” “ Y,” “ Y,” “ Y,” “ M,” “ M,” “ Y,” “ Y,”  
“ Y,” “ Y,” “ M,” “ M,” “ M,” “ M,” “ M,” “ Y,” “ Y,” “ Y,” “ Y,” “ Y,” “ Y,”  
“ Y,” “ Y,” “ M,” “ Y,” “ Y,” “ Y,” “ Y,” “ Y,” “ -,” “ -,” “ -,” “ -,” “ -,” “ -  
,” “ Y,” “ Y,” “ M,” “ M,” “ M,” “ Y,” “ Y,” “ M,” “ M,” “ M”

3.658076,2.619818,8.4869009441119,2.554816,2.616813,3.72152289707367,0.943833944,3.  
782999,4.187865119,2.371082,4.459192,2.916062,3.500693,12.663098,3.398979263,3.32802  
4766,4.651704276,2.377613278,2.86122472,2.043773309,3.093119151,1.911812017,2.55813  
9155,2.4802626,2.520962023,2.6416362,4.078118216,2.925361656,2.425212265,2.63637506  
5,4.601186473,"M," “ M,” “ Y,” “ Y,” “ Y,” “ M,” “ Y,” “ Y,” “ Y,” “ Y,” “ Y,”  
“ Y,” “ Y,” “ M,” “ M,” “ Y,” “ M,” “ Y,”  
“ Y,” “ Y,” “ Y,” “ M,” “ -,”  
“ Y,” “ M,” “ M,”

“ M,” “ M,” “ M,” “ M,” “ Y,” “ Y,” “ Y,” “ Y,” “ M,” “ M,” “ M,” “ Y,”  
“ Y,” “ M,” “ M,” “ Y,”  
“ Y,” “ Y,” “ Y,” “ Y,” “ Y,” “ Y,” “ Y,” “ M,” “ Y,” “ Y,” “ Y,” “ Y,” “ M,”  
“ Y,” “ M,” “ Y,” “ M,” “ M,” “ Y,” “ Y,” “ M,” “ Y,” “ Y,” “ Y,” “ Y,” “ M,”  
“ M,” “ M,” “ M,” “ M,” “ M,” “ Y,” “ Y,” “ M,” “ M,” “ M,” “ M,” “ Y,”  
“ Y,” “ M,” “ M,” “ Y,” “ Y,” “ Y,” “ Y,” “ Y,” “ Y,” “ M,” “ M,” “ M,”  
“ M,” “ M,” “ M,” “ M,” “ M,” “ M,” “ M,” “ M,” “ M,” “ -,” “ Y,” “ M,”  
“ Y,” “ Y,” “ Y,” “ Y,” “ M,”  
“ M,” “ M,” “ Y,” “ M,” “ Y,” “ M,”  
“ M,” “ M,” “ M,” “ Y,” “ M,” “ M,” “ Y,”  
“ M,” “ M,” “ M,” “ M,” “ Y,” “ Y,” “ Y,” “ Y,” “ M,” “ M,” “ M,” “ M,”  
“ M,” “ M,” “ Y,” “ Y,” “ Y,” “ M,” “ Y”

8.274494,7.257412,14.4986226529764,8.623745,8.923228,7.03010255556732,0.924550898,6  
.654907,10.67888869,3.728176,5.357155,9.060624,7.54899,6.326592,8.878087579,4.527337  
208,7.17766325,7.052278938,10.91991915,5.303217175,11.96037744,7.795376042,20,7.894  
96949,-

0.015880287,7.27729636,8.389927447,5.784417615,5.122750825,3.090066386,4.807444788,  
“Y,” “ Y,” “ M,” “ Y,” “ Y,” “ Y,”  
“ Y,” “ Y,” “ M,” “ Y,” “ Y,” “ Y,” “ Y,” “ Y,” “ M,” “ Y,” “ Y,” “ M,” “ M,”  
“ Y,” “ M,” “ M,” “ M,”  
“ M,” “ M,” “ M,” “ M,” “ Y,”  
“ Y,” “ Y,” “ Y,” “ Y,” “ M,”  
“ M,” “ M,” “ Y,” “ Y,” “ M,”  
“ Y,” “ M,” “ Y,” “ Y,” “ M,” “ M,”  
“ M,” “ M,” “ M,” “ M,” “ M,” “ M,” “ M,” “ Y,” “ Y,” “ Y,” “ Y,” “ Y,”  
“ Y,” “ Y,” “ Y,” “ Y,” “ M,” “ Y,” “ Y,”  
“ Y,” “ Y,” “ Y,” “ Y,” “ Y,” “ Y,” “ M,” “ M,” “ M,” “ M,” “ M,” “ M,” “ Y,” “ Y,”  
“ Y,” “ M,” “ M,” “ M,” “ M,” “ Y,” “ Y,” “ M,” “ M,” “ M,” “ M,” “ M,” “ Y,”  
“ Y,” “ M,”  
“ M,” “ Y,” “ Y,” “ Y,” “ M,” “ Y,” “ Y,” “ Y,” “ -,” “ -,” “ -,” “ -,” “ -,” “ -”  
,” “ Y,” “ Y,” “ M,” “ M,” “ Y,” “ M,” “ M,” “ M,” “ Y,” “ Y”

9.176254,5.96413,10.30181442553,6.992725,6.223588,6.43326064849304,1.051051051,5.80  
2484,13.01762335,4.389097,5.651414,8.55992,8.118417,8.80299,6.648506101,7.4657757,1.5  
68678778,5.16206581,8.058543018,4.679829347,8.420191369,6.00570313,13.97852064,7.28  
120832,6.167303101,6.458752896,8.940283679,6.076520949,4.284097072,7.852482474,20,”  
Y,” “ Y,” “ Y,” “ Y,” “ M,” “ M,” “ M,” “ -,” “ M,” “ M,” “ -,” “ Y,” “ Y,”

“ Y,” “ Y,” “ Y,” “ Y,” “ M,” “ M,” “ M,” “ M,” “ M,” “ Y,” “ Y,” “ Y,” “ Y,”  
“ Y,” “ -,” “ M,” “ M,” “ M,” “ M,” “ Y,” “ Y,” “ Y,” “ Y,” “ Y,” “ Y,” “ M,”  
“ M,” “ Y,” “ Y,” “ Y,” “ Y,” “ M,” “ Y,” “ M,” “ M,” “ Y,” “ M,” “ M,”  
“ M,” “ M,” “ Y,” “ Y,” “ M,” “ Y,”  
“ Y,” “ M,”  
“ M,” “ M,” “ M,” “ M,” “ Y,”  
“ M,” “ Y,” “ Y,” “ Y,” “ M,” “ Y,” “ M,” “ Y,” “ M,” “ M,” “ M,” “ M,”  
“ M,” “ Y,” “ Y,” “ M,” “ M,” “ Y,”  
“ M,” “ M,” “ M,” “ Y,” “ Y,” “ M,”  
“ Y,” “ M,” “ Y,”  
“ Y,” “ M,” “ Y,” “ Y,” “ M,” “ M,” “ M,”  
“ M,” “ M,” “ Y,” “ M,” “ Y,” “ Y,” “ Y,” “ Y,” “ Y,” “ Y,” “ M,” “ M,”  
“ M,” “ M,” “ M,” “ Y,” “ Y,” “ M,”  
“ M,” “ M,” “ M,” “ M,” “ M,” “ M,” “ M,” “ M,” “ M,” “ M,” “ M,” “ M,”  
“ Y,” “ Y,” “ Y,” “ Y,” “ Y,” “ Y,” “ M,” “ M,” “ M,” “ M,” “ M,” “ M,” “ M”

3.973405,2.804287,12.7594887203309,2.773446,2.895481,3.83685260256846,0.951306413,4  
.141537,5.009179342,2.190338,4.555625,4.036712,3.59608,6.11594,3.534040209,2.9836276  
44,5.122813465,2.382611763,2.357404886,2.474352105,3.049220712,2.302612372,3.280104  
267,2.626818103,2.583458069,2.967490583,5.51509968,3.318162331,2.853532452,4.043470

742,6.628076219,“M,” “ M,” “ M,” “ M,” “ Y,” “ Y,” “ Y,” “ -,” “ M,” “ M,”  
“ M,” “ Y,” “ Y,” “ Y,” “ Y,” “ -,” “ Y,” “ Y,” “ Y,” “ Y,” “ M,” “ M,” “ M,”  
“ Y,” “ Y,” “ M,” “ M,” “ -,” “ M,” “ M,” “ M,” “ M,” “ M,” “ Y,” “ Y,” “ Y,”  
“ M,” “ Y,”  
“ M,” “ Y,” “ Y,” “ Y,” “ M,” “ M,” “ -,” “ M,” “ Y,” “ M,” “ Y,” “ Y,” “ M,”  
“ Y,” “ M,” “ Y,” “ Y,” “ Y,” “ Y,”  
“ Y,” “ M,” “ Y,”  
“ M,” “ M,” “ M,” “ Y,” “ Y,” “ Y,” “ Y,” “ Y,” “ Y,” “ M,” “ M,” “ M,”  
“ M,” “ Y,” “ Y,” “ Y,” “ Y,” “ M,”  
“ Y,” “ -,” “ M,”  
“ M,” “ M,” “ M,” “ M,” “ M,” “ M,” “ Y,” “ Y,” “ M,” “ M,” “ M,” “ Y,”  
“ Y,” “ M,” “ Y,” “ Y,” “ Y,” “ Y,” “ Y,” “ Y,” “ M,” “ M,” “ M,” “ M,”  
“ M,” “ M,” “ Y,” “ M,” “ M,” “ M,” “ Y,” “ Y,” “ -,” “ -,” “ Y,” “ Y,” “ Y,”  
“ Y,” “ Y,” “ M,” “ M,” “ M,” “ M,” “ M,” “ -,” “ -,” “ Y,” “ Y,” “ Y,” “ M,”  
“ M,” “ M,” “ Y,” “ Y,” “ M,” “ M,” “ M,” “ M,” “ Y,” “ M,” “ M,”  
“ M,” “ M”

8.834824,6.121412,11.7732795275465,10.389768,6.109931,7.58443926886998,1.140083218,  
7.433695,10.72576748,3.998239,4.933966,8.792847,7.826652,12.393709,7.397508438,6.171

127578,7.652475076,5.40585005,6.380020806,5.425139104,16.94546765,5.877591895,18.06  
760214,6.035146563,1.253705298,6.585376207,9.314540958,6.616344277,6.33009029,5.796

717273,20,"Y," " Y," " Y," " Y," " Y," " Y," " M," " -," " Y," " Y," " Y,"  
" Y," " Y," " Y," " Y," " Y," " Y," " Y," " M," " M," " M," " Y," " Y," " Y,"  
" Y," " Y," " Y," " -," " Y," " Y," " Y," " Y," " Y," " M," " M," " M," " M,"  
" M," " -," " M," " Y," " Y," " Y,"  
" Y," " Y," " Y," " Y," " M," " -," " M," " M," " Y," " Y," " Y," " Y," " M,"  
" Y," " Y," " Y," " Y," " Y," " M,"  
" M," " M," " M," " M," " M," " Y,"  
" Y," " M," " M," " M," " M," " M," " M," " Y," " Y," " Y," " Y," " Y,"  
" Y," " M," " Y," " Y," " M," " M," " M," " Y," " Y," " M," " M," " M,"  
" M," " M," " M," " M," " M," " M," " M," " Y," " Y," " Y," " Y," " Y," " -,"  
" M," " M," " M," " Y," " M,"  
" Y," " Y," " Y," " -," " Y," " Y," " M," " M," " M," " M," " -," " M," " Y,"  
" Y," " Y," " Y," " M," " M," " M," " -," " Y," " M," " Y," " Y," " Y," " Y,"  
" Y," " Y," " Y," " Y," " M," " Y," " M," " M," " Y," " Y," " M," " M,"  
" M," " M," " Y," " Y," " Y," " M," " M," " M," " Y," " Y," " Y," " Y," " Y,"  
" Y," " Y," " Y," " M," " M," " Y," " Y," " Y," " Y," " M," " M"

3.659847,2.744655,9.4384389366834,2.753474,2.820268,3.88873288407726,0.725590956,3.  
919509,6.776662883,2.325894,4.861238,3.212299,3.541912,6.088081,3.418669601,4.381405  
497,4.850528463,2.450908684,2.777055834,2.406812984,2.853592658,2.447581434,3.30433  
9362,2.747554924,2.816355584,2.855746638,6.869372154,3.148412784,2.838665195,2.5617

51345,17.00037421,"Y," " -," " -," " Y," " -," " Y," " Y," " -," " M," " M,"  
" Y," " -," " Y," " -," " Y," " Y," " M," " M," " -," " Y," " Y," " Y," " M,"  
" M," " M," " M," " Y," " -," " Y," " M," " M," " M," " Y," " M," " M,"  
" M," " M," " M," " -," " M," " M," " M," " M," " M," " Y," " Y," " -," " -,"  
" M," " M," " -," " Y," " Y," " M," " -," " M," " Y," " Y," " -," " M," " Y,"  
" -," " M," " -," " M," " Y," " M," " Y,"  
" Y," " M," " M," " M," " -," " M," " -," " M," " -," " Y," " Y," " Y," " Y,"  
" Y," " Y," " Y," " Y," " M," " M," " M," " -," " M," " M," " M," " Y," " Y,"  
" -," " M," " Y," " Y," " Y," " Y," " Y," " M," " M," " M," " M," " -," " M,"  
" M," " M," " -," " -," " Y," " Y," " Y," " Y," " Y," " Y," " -," " Y," " Y,"  
" Y," " M," " Y," " Y," " Y," " M," " M," " -," " Y," " Y," " Y," " Y," " Y,"  
" -," " -," " Y," " Y," " -," " Y," " Y," " Y," " M," " M," " M," " M," " -,"  
" Y," " M," " M," " M,"  
" M," " M," " M," " Y," " M,"  
" M," " M," " M," " M," " M," " M," " M," " M," " M," " M," " M," " M,"  
" M," " M," " M," " M," " M," " M," " M," " M"



8.167182,4.709777,10.2842970574126,6.359726,4.811203,6.68848055259141,1.040897098,4  
.257109,8.606230015,3.655264,4.418016,8.771991,6.499145,7.244077,6.301820523,4.24911  
5989,6.878889304,8.334811576,6.178449951,3.994078571,8.252308814,4.902938931,7.8611  
51121,5.54192994,2.986859048,5.069117381,7.692181594,5.767894598,5.129041797,7.3625  
79863,20,"Y," " Y," " Y," " -," " M," " M," " M," " -," " M," " M," " M,"  
" M," " Y," " Y," " Y," " Y," " M," " Y," " M," " M," " M," " M," " Y,"  
" Y," " M," " M," " Y," " -," " Y," " -,"  
" M," " M," " M," " M," " Y," " Y," " Y," " Y," " Y," " Y," " M," " Y," " Y,"  
" Y," " Y," " M," " M," " Y," " M," " -," " M," " Y," " -," " Y," " Y," " -,"  
" M," " Y," " Y," " Y," " M," " M," " Y," " -," " Y," " Y," " Y," " M," " Y,"  
" Y," " Y," " Y," " Y," " M," " M," " M," " -," " Y," " Y," " Y," " Y," " Y,"  
" Y," " M,"  
" M," " M," " M," " M," " M," " M," " M," " Y," " Y," " Y," " Y," " Y,"  
" Y," " Y," " Y," " Y," " M," " M," " M," " M," " M," " M," " Y," " Y,"  
" M," " Y," " Y,"  
" Y," " Y," " Y," " Y," " Y," " Y," " Y," " M," " M," " Y," " Y," " Y," " Y,"  
" Y," " Y," " Y," " Y," " Y," " Y," " Y," " Y," " Y," " Y," " M," " M," " M,"  
" Y," " Y," " Y," " M," " Y," " Y,"  
" Y," " Y," " Y," " Y," " Y," " M,"  
" M," " M," " M," " M," " M," " M," " M," " Y," " Y," " Y," " Y," " Y"

5.196733,4.330834,14.9919986876371,3.144229,4.771664,4.08825665283073,0.786407767,6  
.938323,6.922618385,2.412488,4.903353,4.684045,3.675226,9.263929,5.482007696,5.16228  
7906,4.975572127,2.490948064,4.767527914,2.907198265,2.655717453,3.753635499,5.2490  
071,3.971313696,2.967385066,4.099000357,5.317586183,5.212058946,3.209796661,6.50555  
4338,10.32282279,"Y," " Y," " Y," " Y," " M," " M," " M," " -," " M," " M,"  
" M," " Y," " Y," " Y," " M," " Y," " Y," " -," " Y," " -," " M," " M," " Y,"  
" Y," " Y," " Y," " Y," " -," " Y,"  
" Y," " Y," " Y," " Y," " Y," " M," " M," " M," " Y," " Y," " -," " M," " Y,"  
" Y," " Y," " Y," " Y," " Y," " Y," " Y," " Y," " Y," " Y," " Y," " Y," " Y,"  
" Y," " Y," " Y," " Y," " Y," " Y," " M," " M," " M," " Y," " Y," " -," " Y,"  
" Y," " M," " Y," " Y," " Y," " M," " M," " M," " Y," " Y," " Y," " M," " Y,"  
" Y," " M," " M," " M," " M," " Y," " Y," " Y," " M," " Y," " Y," " Y," " Y,"  
" Y," " Y," " Y," " Y," " Y," " M," " M," " M," " M," " Y," " Y," " Y," " M,"  
" M," " M," " Y," " M,"  
" M," " Y," " M," " M," " M," " Y," " Y,"  
" Y," " Y," " M," " Y," " Y," " Y,"  
" Y," " Y," " Y," " Y," " M," " M," " M," " M," " Y," " Y," " M," " M,"

" M," " M," " M," " M," " Y," " Y," " -," " Y," " Y," " Y," " Y," " -," " Y,"  
" Y," " Y," " M," " M," " M," " M," " M," " M," " Y"

4.003898,2.887615,15.532875487145,2.551031,2.723094,4.17578994225929,0.902948403,4.  
104966,7.599346391,2.184479,4.748615,3.12751,3.601759,9.910034,3.655703388,3.8329764  
78,4.917276614,2.521456807,2.532857952,2.340822201,3.227767908,2.256938994,3.477170  
66,2.637958109,2.656008061,2.883545793,4.632970625,3.127025352,2.55994044,6.0326384

19,7.557693342,"Y," " -," " -," " Y," " -," " -," " Y," " -," " Y," " Y," " Y," " -  
," " Y," " -," " M," " M," " M," " M," " Y," " Y," " Y," " Y," " Y," " -,"  
" M," " M," " M," " -," " M," " M," " Y," " Y," " Y," " M," " M," " -," " M,"  
" M," " M," " M," " M," " M," " M," " M," " M," " M," " -," " -," " Y," " Y,"  
" Y," " Y," " Y," " Y," " Y," " M," " M," " Y," " Y," " M," " Y," " M," " Y,"  
" M," " M," " M," " M," " Y," " M," " Y,"  
" Y," " Y," " Y," " M," " -," " M," " M," " Y," " -," " M," " M," " Y," " M,"  
" Y," " M," " Y," " Y," " Y," " Y," " Y," " -," " M," " Y," " M," " M," " M,"  
" M," " M," " M," " M," " M," " M," " M," " M," " M," " -," " -," " M,"  
" M," " M," " M," " Y," " M," " M," " M," " M," " M," " Y," " Y," " Y," " -  
," " Y," " M," " M," " M," " M," " M," " M," " -," " M," " M," " Y," " Y," " M,"  
" M," " M," " Y," " Y," " -," " M," " M," " M," " M," " -," " Y," " Y," " M,"  
" M," " M," " Y," " Y," " Y," " Y," " Y," " Y," " M," " Y," " Y," " Y," " M,"  
" M," " M," " -," " Y," " M," " M," " M,"  
" Y," " Y," " M," " M," " Y," " M,"  
" Y," " Y"

9.462746,6.855102,11.4100625860979,5.172645,6.109073,5.55546843620535,1.081203008,3  
.059272,10.39597202,3.236985,3.922321,8.958788,6.081548,11.508819,6.814030374,2.5400  
76042,6.018031064,4.354017583,9.783761416,3.629426602,9.40327753,7.575575102,20,7.2  
8720528,-

3.844341686,5.539456112,7.4562936,4.529122174,4.420045101,3.985506787,4.677568645,"  
M," " Y," " Y," " Y," " Y," " Y," " Y," " -," " Y," " Y," " M," " M," " M,"  
" M," " Y," " -," " Y," " M,"  
" M," " -," " Y," " Y," " M," " M," " Y," " Y," " Y," " Y," " M," " M," " M,"  
" M," " M," " Y," " Y," " Y," " Y," " Y," " Y," " M," " M," " M," " M," " M,"  
" M," " Y," " Y," " Y," " M," " M," " Y," " M," " M," " M," " M," " M,"  
" Y," " M," " M," " M," " M," " M," " Y," " Y," " Y," " Y," " Y," " M," " M,"  
" M," " M," " M," " M," " M," " M," " M," " Y," " Y," " Y," " M," " Y,"  
" Y," " M," " M," " Y," " M," " M,"  
" Y," " M," " M," " M," " Y," " M," " M,"  
" M," " M," " Y," " Y," " Y," " M," " M," " Y," " Y," " Y," " Y," " Y," " Y,"  
" Y," " Y," " M," " Y," " Y," " M,"

“ M,” “ M,” “ M,” “ Y,” “ M,”  
“ M,” “ M,” “ M,” “ M,” “ M,” “ M,” “ M,” “ M,” “ M,” “ Y,” “ Y,” “ Y,”  
“ Y,” “ Y,” “ Y,” “ Y,” “ Y,” “ Y,” “ Y,” “ Y,” “ Y,” “ M,” “ M,” “ Y,” “ Y,”  
“ Y,” “ M,” “ M,” “ Y,” “ Y,” “ Y,” “ Y,” “ M,” “ M,” “ M,” “ M,” “ M,”  
“ M,” “ M,” “ M,” “ Y,” “ M,” “ M,” “ Y,” “ M,” “ M,” “ M,” “ M”

9.02985,5.687821,15.1979564291134,7.927207,5.921452,6.15370228120942,0.955686854,5.  
559119,9.676242559,4.69934,5.99685,8.534075,7.866835,8.584786,6.444721377,8.17825186  
9,8.949718639,5.260133542,8.07754065,5.082677417,10.30697329,5.542337973,11.0899444  
5,6.532316561,4.770736577,6.210955481,8.828519588,7.519273321,5.848581548,6.3741830

47,20,"Y," “ M,”  
“ M,” “ Y,” “ M,” “ Y,” “ Y,” “ Y,”  
“ M,” “ -,” “ M,”  
“ M,” “ M,” “ M,” “ M,” “ M,” “ M,” “ M,” “ M,” “ M,” “ M,” “ M,” “ Y,”  
“ Y,” “ Y,” “ Y,” “ Y,” “ Y,” “ Y,” “ -,” “ Y,” “ Y,” “ -,” “ M,” “ M,” “ -,”  
“ Y,” “ Y,” “ M,”  
“ M,” “ M,” “ M,” “ M,” “ M,” “ M,” “ Y,” “ Y,” “ -,” “ M,” “ M,” “ M,”  
“ M,” “ Y,” “ Y,” “ Y,” “ Y,” “ M,” “ Y,” “ Y,” “ M,” “ Y,” “ M,” “ M,”  
“ M,” “ M,” “ M,” “ M,” “ M,” “ M,” “ Y,” “ Y,” “ Y,” “ Y,” “ Y,” “ Y,”  
“ Y,” “ Y,” “ Y,” “ Y,” “ Y,” “ Y,” “ M,” “ M,” “ M,” “ M,” “ M,” “ M,”  
“ Y,” “ -,” “ Y,” “ Y,” “ Y,” “ Y,” “ Y,” “ M,” “ M,” “ M,” “ Y,” “ Y,” “ Y,”  
“ Y,” “ Y,” “ Y,” “ Y,” “ -,” “ Y,” “ Y,” “ Y,” “ -,” “ Y,” “ Y,” “ Y,” “ Y,”  
“ Y,” “ Y,” “ Y,” “ M,” “ Y,” “ M,”  
“ M,” “ M,” “ M,” “ M,” “ M,” “ M,” “ M,” “ M,” “ M,” “ Y,” “ Y,” “ Y,” “ Y,”  
“ M,” “ M,” “ M,” “ M,” “ Y,” “ M,” “ M,” “ M,” “ M,” “ Y,” “ Y,” “ Y,”  
“ M,” “ M,” “ M,” “ M,” “ M,” “ Y,” “ Y,” “ Y,” “ Y,” “ M,” “ M,” “ M,” “ Y”

3.938121,2.735393,4.26584411433564,2.690766,2.829368,3.91073849189588,0.986842105,4  
.280615,4.238226867,2.715563,4.680702,2.946682,3.19447,12.177771,3.26815088,3.946118  
278,4.583309618,2.516923515,2.696798176,2.4732279,3.017323303,2.531570675,3.9232393  
3,2.730264409,2.646566461,2.986561842,5.355221011,3.319439335,2.485608154,2.9284831

91,13.28665736,"Y," “ Y,” “ Y,” “ Y,” “ Y,” “ Y,” “ Y,” “ -,” “ M,” “ M,” “ M,”  
“ M,” “ M,” “ M,” “ M,” “ M,” “ M,” “ M,” “ M,” “ Y,” “ Y,” “ Y,” “ Y,”  
“ Y,” “ Y,” “ M,” “ M,” “ -,” “ M,” “ M,” “ M,” “ M,” “ M,” “ M,” “ Y,”  
“ Y,” “ Y,” “ Y,” “ Y,” “ Y,” “ Y,” “ Y,” “ M,” “ M,” “ Y,” “ Y,” “ Y,” “ M,”  
“ Y,” “ Y,” “ Y,” “ Y,” “ Y,” “ Y,” “ -,” “ M,” “ M,” “ Y,” “ Y,” “ Y,” “ Y,”  
“ Y,” “ M,” “ M,” “ M,” “ M,” “ M,” “ Y,”  
“ Y,” “ Y,” “ Y,” “ Y,” “ M,” “ Y,” “ M,” “ M,” “ Y,” “ Y,” “ Y,” “ Y,”  
“ Y,” “ M,” “ M,” “ M,” “ Y,” “ Y,” “ Y,” “ Y,” “ M,” “ M,” “ M,” “ M,”  
“ Y,” “ M,” “ M,” “ -,” “ M,” “ Y,” “ Y,” “ Y,” “ M,” “ M,” “ M,” “ M,”

“ M,” “ M,” “ Y,” “ -,”  
“ Y,” “ Y,” “ M,” “ M,” “ M,” “ M,” “ Y,” “ Y,” “ M,” “ -,” “ Y,” “ M,” “ Y,”  
“ Y,” “ Y,” “ -,” “ M,” “ M,” “ M,” “ Y,”  
“ M,” “ Y,” “ Y,” “ M,” “ Y,” “ Y,” “ Y,” “ M,” “ M,” “ M,” “ Y,” “ Y,” “ Y,”  
“ M,” “ M,” “ M,” “ -,” “ Y,” “ M,” “ M,” “ M,” “ M,” “ M,” “ M,” “ Y,”  
“ Y,” “ Y,” “ Y,” “ Y,” “ M,” “ M,” “ Y,” “ M,” “ Y,” “ Y,” “ Y,” “ Y,” “ Y,”  
“ Y,” “ M,” “ M,” “ M,” “ Y,” “ M,” “ M,” “ M,” “ M,” “ M”

4.13809,3.037916,12.8108699044406,2.494323,2.913998,3.80903756813683,0.388180765,4.  
500663,4.897730653,2.715677,4.945386,3.124926,3.753164,12.301801,3.730394384,4.55684  
7802,4.832058634,2.652039017,3.184087871,2.899490433,3.39296237,2.601316758,3.17391  
4662,2.914184117,2.752443441,3.016163025,5.44774039,3.484334082,3.026543722,3.93483

2957,6.329600841,"Y," “ Y,” “ Y,” “ Y,” “ M,” “ M,” “ Y,” “ -,” “ Y,” “ Y,”  
“ Y,” “ Y,” “ Y,” “ Y,” “ Y,” “ Y,” “ Y,” “ M,” “ M,” “ M,” “ M,” “ M,” “ Y,”  
“ Y,” “ Y,” “ Y,” “ Y,” “ -,” “ Y,” “ M,”  
“ Y,” “ Y,” “ Y,” “ M,” “ Y,” “ Y,” “ Y,” “ Y,” “ Y,” “ M,” “ M,” “ -,” “ M,”  
“ M,” “ Y,” “ Y,” “ Y,” “ M,” “ -,” “ M,” “ M,” “ M,” “ M,” “ M,” “ Y,”  
“ M,” “ M,” “ Y,” “ Y,” “ Y,” “ Y,” “ M,” “ Y,” “ Y,” “ Y,” “ M,” “ M,” “ Y,”  
“ Y,” “ Y,” “ Y,” “ Y,” “ Y,” “ Y,” “ Y,” “ M,” “ Y,” “ Y,” “ Y,” “ Y,” “ M,”  
“ M,” “ Y,” “ M,” “ M,” “ M,” “ M,” “ Y,” “ Y,” “ M,” “ M,” “ M,” “ M,”  
“ M,” “ M,” “ M,” “ M,” “ M,” “ M,” “ M,” “ M,” “ Y,” “ Y,” “ Y,” “ M,”  
“ M,” “ M,” “ Y,” “ Y,” “ M,” “ M,” “ M,” “ Y,” “ Y,” “ Y,” “ Y,” “ Y,” “ -,”  
“ Y,” “ Y,” “ Y,” “ Y,” “ M,” “ M,” “ M,” “ M,” “ M,” “ M,” “ Y,” “ Y,”  
“ Y,” “ Y,” “ Y,” “ M,” “ Y,” “ M,”  
“ M,” “ M,” “ Y,” “ Y,” “ Y,” “ Y,” “ -,” “ Y,” “ Y,” “ Y,” “ Y,” “ Y,” “ Y,”  
“ Y,” “ M,” “ Y,” “ Y,” “ -,” “ Y,” “ Y,” “ M,” “ M,” “ M,” “ M,” “ Y,” “ Y,”  
“ M,” “ Y,” “ Y,” “ -,” “ M,” “ Y,” “ Y,” “ Y,” “ M,” “ M,” “ M,” “ M,” “ Y,”  
“ Y,” “ Y,” “ M,” “ M,” “ Y,” “ Y,” “ Y,” “ M,” “ M,” “ Y”

10.284612,7.270476,11.2117434176959,8.38522,6.924855,5.31642502071864,0.997278912,7.  
.467314,9.153151701,5.214373,6.079334,8.202735,8.983035,20,7.911607032,8.686147539,1.  
245909517,4.885938067,9.840128105,4.646282949,9.743177302,6.929272055,11.47179486,  
6.782260542,4.233500804,7.384201937,10.15027379,8.496674395,5.425295048,5.49252132

5,9.377744759,"Y," “ Y,” “ M,” “ M,” “ -,” “ Y,” “ Y,” “ -,” “ Y,” “ Y,” “ Y,”  
“ Y,” “ Y,” “ Y,” “ Y,” “ Y,” “ Y,” “ Y,” “ M,” “ M,” “ M,” “ M,” “ Y,” “ Y,”  
“-,” “ Y,” “ Y,” “ -,” “ M,” “ M,” “ M,” “ M,” “ Y,” “ Y,” “ Y,” “ -,” “ M,”  
“ M,” “ M,” “ M,” “ Y,” “ M,” “ M,” “ M,” “ M,” “ -,” “ Y,” “ Y,” “ M,”  
“ Y,” “ Y,” “ Y,” “ Y,” “ Y,” “ -,” “ Y,” “ Y,” “ M,” “ Y,” “ Y,” “ Y,” “ M,”  
“ M,” “ Y,” “ Y,” “ M,” “ M,” “ M,” “ Y,” “ M,” “ M,” “ Y,” “ Y,” “ Y,”  
“ M,” “ M,” “ M,” “ M,” “ M,” “ M,” “ Y,” “ Y,” “ M,” “ Y,” “ M,” “ M,”

“ M,” “ M,” “ Y,” “ M,” “ M,” “ M,” “ Y,” “ Y,” “ Y,” “ Y,” “ M,” “ M,”  
“ M,” “ M,” “ M,” “ Y,”  
“ Y,” “ Y,” “ Y,” “ Y,” “ Y,” “ Y,” “ Y,” “ Y,” “ Y,” “ M,” “ M,” “ M,” “ M,”  
“ Y,” “ Y,” “ Y,” “ Y,” “ M,” “ M,” “ Y,” “ Y,” “ Y,” “ -,” “ Y,” “ M,” “ M,”  
“ M,” “ Y,” “ -,” “ M,” “ M,” “ M,” “ M,” “ M,” “ M,” “ -,” “ M,” “ Y,” “ Y,”  
“ Y,” “ M,” “ Y,” “ M,” “ M,” “ -,” “ M,” “ M,” “ Y,” “ Y,” “ M,” “ M,”  
“ M,” “ M,” “ Y,” “ Y,” “ M,” “ Y,” “ Y,” “ Y,” “ Y,” “ M,” “ M,” “ M,”  
“ M,” “ M,” “ M,” “ M,” “ -,” “ -,” “ M,” “ Y,” “ -,” “ -,” “ -,” “ -,” “ -,” “ -”  
,” “ Y,” “ Y,” “ Y,” “ Y,” “ Y,” “ Y,” “ M,” “ M,” “ M,” “ M”

9.375774,6.289803,10.9483555655384,6.72355,6.101074,5.98497806498581,1.071030641,6.  
500202,8.65563661,2.734424,4.183946,8.452906,9.385393,16.732548,6.291625376,5.868078  
338,6.465071386,4.436915394,8.110206831,5.3236158,9.954579752,4.52695675,13.8765397  
6,6.14169239,3.124123561,6.172643058,7.339203748,7.072905656,3.443635854,5.10060387  
,7.894610547,"M," “ M,” “ Y,” “ Y,” “ M,” “ M,” “ M,” “ -,” “ M,” “ Y,” “ Y,”  
“ Y,” “ Y,” “ Y,” “ M,” “ M,” “ M,” “ Y,”  
“ M,” “ M,” “ M,” “ -,” “ M,” “ -,”  
“ Y,” “ M,” “ M,” “ Y,” “ M,” “ M,”  
“ M,” “ M,” “ M,” “ M,” “ M,” “ M,” “ M,” “ M,” “ M,” “ Y,” “ Y,” “ M,”  
“ M,” “ M,” “ Y,” “ M,” “ Y,” “ Y,”  
“ Y,” “ M,”  
“ M,” “ M,” “ M,” “ M,” “ M,” “ M,” “ M,” “ M,” “ M,” “ M,” “ M,” “ Y,”  
“ Y,” “ Y,” “ Y,” “ M,” “ M,” “ M,” “ Y,” “ Y,” “ Y,” “ Y,” “ M,” “ M,”  
“ M,” “ Y,” “ Y,” “ M,” “ Y,” “ -,”  
“ Y,” “ Y,” “ M,” “ M,” “ M,” “ -,” “ M,” “ Y,” “ Y,” “ Y,” “ M,” “ M,” “ M,”  
“ M,” “ M,” “ M,” “ M,” “ M,” “ Y,”  
“ Y,” “ M,” “ Y,” “ Y,” “ M,” “ M,”  
“ M,” “ M,” “ M,” “ M,” “ M,” “ M,” “ M,” “ Y,” “ M,” “ M,” “ M,” “ M,”  
“ M,” “ M”

3.575097,3.114856,15.8301676406233,3.347257,2.964727,4.54713285642558,0.92782305,4.  
469246,5.079184333,3.040369,4.975433,3.379012,3.833385,17.96159,3.735793042,4.845125  
588,4.868378736,2.531948058,3.211965462,2.61862623,3.206562845,2.47303828,3.7396735  
51,2.926757834,2.854213404,3.287090505,5.297570663,3.325824531,2.879000621,3.893126  
772,6.507420271,"M," “ M,” “ M,” “ M,” “ M,” “ M,” “ Y,” “ -,” “ Y,” “ Y,”  
“ Y,” “ Y,” “ Y,” “ Y,” “ Y,” “ Y,” “ Y,” “ M,” “ Y,” “ Y,” “ M,” “ Y,” “ M,”  
“ M,” “ Y,” “ Y,” “ Y,” “ -,” “ Y,”  
“ Y,” “ Y,” “ Y,” “ M,” “ Y,” “ Y,” “ Y,” “ M,” “ M,” “ M,” “ M,” “ Y,”

“ M,” “ M,” “ M,” “ M,” “ M,” “ M,” “ Y,” “ Y,” “ Y,” “ Y,” “ Y,” “ Y,”  
“ Y,” “ Y,” “ Y,” “ Y,” “ Y,” “ Y,” “ Y,” “ M,” “ M,” “ M,” “ Y,” “ Y,” “ M,”  
“ Y,” “ -,” “ M,” “ Y,”  
“ M,” “ Y,” “ Y,” “ Y,” “ Y,” “ M,” “ M,” “ M,” “ Y,” “ M,” “ Y,” “ Y,”  
“ M,” “ Y,” “ M,” “ M,” “ M,” “ M,” “ M,” “ Y,” “ Y,” “ M,” “ M,” “ M,”  
“ M,” “ Y,” “ Y,” “ Y,” “ Y,” “ M,” “ Y,”  
“ Y,” “ Y,” “ Y,” “ Y,” “ Y,” “ Y,” “ Y,” “ Y,” “ Y,” “ Y,” “ -,” “ Y,” “ Y,”  
“ Y,” “ Y,” “ Y,” “ Y,” “ Y,” “ Y,” “ Y,” “ Y,” “ Y,” “ Y,” “ M,” “ M,” “ M,”  
“ M,” “ M,” “ M,” “ M,” “ M,” “ Y,”  
“ Y,” “ Y,” “ M,” “ M,” “ M,” “ M,” “ M,” “ M,” “ Y,” “ M,” “ M,” “ Y,”  
“ Y,” “ M,” “ Y,” “ M,” “ M,” “ M,” “ Y,” “ Y,” “ -,” “ M,” “ Y,” “ Y,” “ Y,”  
“ Y,” “ -,” “ Y,” “ Y,” “ Y,” “ Y,” “ -,” “ Y,” “ M,” “ M,” “ M”

10.43007,6.38633,15.2054041406788,6.455781,6.356317,6.38898351146834,1.029850746,5.  
889598,9.258836092,3.757867,4.7685,7.483177,6.214024,10.115177,5.985066809,7.4476738  
82,8.904677878,5.141421065,8.085967215,4.912976162,10.28081846,5.156332304,15.49434  
759,6.237797973,2.498182921,5.596527964,7.602322539,6.300269942,5.564920047,6.75141  
0972,15.67895674,"Y," “ M,” “ M,” “ M,” “ M,” “ M,” “ M,” “ -,” “ Y,” “ Y,”  
“ Y,” “ Y,” “ Y,” “ Y,” “ Y,” “ M,” “ M,” “ Y,” “ Y,” “ Y,” “ Y,” “ Y,” “ Y,”  
“ M,” “ Y,” “ Y,” “ Y,” “ -,” “ Y,” “ Y,” “ Y,” “ M,” “ M,” “ M,” “ M,” “ M,”  
“ M,” “ M,” “ Y,” “ Y,” “ Y,” “ M,” “ M,” “ M,” “ M,” “ M,” “ M,” “ Y,”  
“ Y,” “ Y,” “ Y,” “ Y,” “ Y,” “ Y,” “ Y,” “ Y,” “ Y,” “ M,” “ M,” “ Y,” “ Y,”  
“ M,” “ M,” “ Y,” “ M,” “ M,” “ M,” “ M,” “ M,” “ Y,” “ Y,” “ Y,” “ Y,” “ M,”  
“ M,” “ M,” “ M,” “ M,” “ M,” “ M,” “ M,” “ M,” “ Y,” “ Y,” “ M,” “ M,” “ M,”  
“ M,” “ M,” “ M,” “ M,” “ Y,” “ Y,” “ Y,” “ Y,” “ Y,” “ Y,” “ M,” “ M,”  
“ M,” “ M,” “ M,” “ Y,” “ Y,” “ -,” “ M,” “ M,” “ M,” “ Y,” “ M,” “ M,”  
“ M,” “ Y,” “ Y,” “ Y,” “ Y,” “ Y,” “ Y,” “ M,” “ M,” “ M,” “ M,” “ M,” “ M,”  
“ M,” “ M,” “ Y,” “ Y,” “ Y,” “ Y,” “ M,” “ M,” “ M,” “ M,” “ M,” “ M,”  
“ Y,” “ Y,” “ M,” “ Y,” “ -,” “ Y,” “ Y,”  
“ Y,” “ Y,” “ Y,” “ Y,” “ Y,” “ M,”  
“ M,” “ M,” “ M,” “ M,” “ M,” “ M,” “ M,” “ Y,” “ Y,” “ Y,” “ Y,” “ Y,”  
“ Y,” “ Y,” “ Y,” “ Y,” “ M,” “ Y,” “ Y,” “ Y,” “ Y,” “ M,” “ M,” “ M,” “ M,”  
“ M,” “ M,” “ M,” “ M,” “ M,” “ M,” “ M,” “ M,” “ M,” “ M,” “ Y,” “ M,”  
“ M,” “ Y,” “ Y,” “ Y”

3.282344,2.983092,12.487450699923,2.55882,2.775188,3.69539231573065,0.672661871,3.8  
15179,4.29013427,2.444498,4.595145,2.844958,3.562039,6.749201,3.356463173,4.19836051  
8,4.801785551,2.508218915,2.669570242,2.348449652,3.09683546,2.440599161,6.92196453  
2,2.732527592,2.879457849,2.581703522,4.574365331,3.233381998,2.324395552,9.4775109  
73,7.655053265,"Y," “ M,” “ M,” “ Y,” “ Y,” “ Y,” “ M,” “ -,” “ M,” “ M,”

“ M,” “ M,” “ M,” “ M,” “ M,” “ M,” “ M,” “ Y,” “ Y,” “ Y,” “ M,” “ M,”  
“ M,” “ Y,” “ M,” “ M,” “ M,” “ -,” “ M,” “ Y,” “ Y,” “ M,” “ M,” “ Y,” “ Y,”  
“ Y,” “ Y,” “ Y,” “ Y,” “ Y,” “ Y,” “ Y,” “ Y,” “ Y,” “ Y,” “ M,” “ M,”  
“ M,” “ M,” “ Y,” “ Y,” “ -,” “ M,” “ M,” “ M,” “ M,” “ Y,” “ M,” “ M,”  
“ Y,” “ M,” “ Y,”  
“ Y,” “ -,” “ Y,” “ M,” “ M,” “ M,” “ Y,” “ M,” “ M,” “ M,” “ M,” “ -,” “ M,”  
“ M,” “ M,” “ Y,” “ M,” “ M,” “ M,” “ M,” “ -,” “ -,” “ Y,” “ Y,” “ Y,” “ Y,”  
“ Y,” “ Y,” “ Y,” “ Y,” “ Y,” “ Y,” “ M,” “ M,” “ M,” “ M,” “ M,” “ M,”  
“ M,” “ M,” “ M,” “ M,” “ M,” “ M,” “ M,” “ M,” “ M,” “ M,” “ Y,” “ M,”  
“ M,” “ M,” “ M,” “ M,” “ Y,” “ Y,” “ -,” “ -,” “ Y,” “ -,” “ Y,” “ Y,” “ Y,”  
“ M,” “ M,” “ Y,” “ -,” “ Y,” “ Y,” “ Y,”  
“ Y,” “ M,” “ M,” “ M,” “ M,” “ M,” “ M,” “ Y,” “ Y,” “ Y,” “ Y,” “ M,”  
“ M,” “ M,” “ M,” “ M,” “ M,” “ M,” “ M,” “ M,” “ Y,” “ Y,” “ Y,” “ Y,”  
“ Y,” “ Y,” “ M,” “ M,” “ M,” “ Y,” “ Y,” “ Y,” “ Y,” “ M,” “ M,” “ M,”  
“ M,” “ Y,” “ M,” “ M,” “ Y,” “ Y”

7.97482,6.109138,11.3253136185109,7.717117,6.536099,6.15132444039614,1.0512,4.95142  
2,6.616721252,5.549119,4.692876,10.064515,5.048745,20,6.835692827,6.507190516,4.8460  
28436,6.285660196,8.988391824,5.287338898,11.65029586,6.077141836,9.027154033,6.326  
799212,1.340915371,6.431127087,8.696468037,5.958946311,4.951685916,6.518104054,7.39  
1638589,"M," “ M,” “ -,” “ M,” “ -,” “ M,” “ M,” “ M,” “ Y,” “ Y,” “ Y,” “ Y,”  
“ Y,” “ Y,” “ Y,” “ M,” “ M,” “ Y,” “ Y,” “ Y,” “ Y,” “ M,” “ Y,” “ -,” “ Y,”  
“ Y,” “ Y,” “ M,” “ M,” “ M,” “ M,” “ Y,” “ -,” “ Y,” “ Y,” “ -,” “ M,” “ M,”  
“ Y,” “ M,” “ -,” “ Y,” “ Y,” “ M,” “ -,”  
“ M,” “ -,” “ M,” “ Y,” “ -,” “ M,” “ Y,” “ -,” “ Y,” “ M,” “ Y,” “ Y,” “ Y,”  
“ Y,” “ Y,” “ Y,” “ Y,” “ Y,” “ Y,” “ M,” “ M,” “ M,” “ M,” “ M,” “ M,”  
“ M,” “ M,” “ M,” “ Y,” “ Y,” “ Y,” “ Y,” “ Y,” “ -,” “ Y,” “ Y,” “ Y,” “ Y,”  
“ Y,” “ Y,” “ Y,” “ M,” “ Y,” “ -,” “ M,” “ M,” “ M,” “ M,” “ M,” “ M,”  
“ M,” “ M,” “ M,” “ M,” “ M,” “ M,” “ M,” “ -,” “ M,” “ M,” “ -,” “ -,” “ Y,”  
“ Y,” “ Y,” “ M,” “ M,” “ Y,” “ Y,” “ Y,” “ M,” “ M,” “ M,” “ M,” “ Y,”  
“ Y,” “ Y,” “ Y,” “ -,” “ -,” “ Y,” “ Y,” “ -,” “ Y,” “ M,” “ M,” “ M,” “ -,”  
“ M,” “ Y,” “ M,” “ M,” “ M,” “ M,” “ -,” “ M,” “ M,” “ -,” “ M,” “ -,” “ M,”  
“ M,” “ M,” “ Y,” “ -,” “ Y,” “ Y,” “ Y,” “ M,” “ M,” “ M,” “ Y,” “ Y,” “ Y,”  
“ Y,” “ -,” “ -,” “ Y,” “ Y,” “ Y,” “ Y,” “ M,” “ M,” “ Y,” “ Y,” “ Y,” “ Y,”  
“ Y,” “ -,” “ Y,”  
“ Y,” “ Y,” “ Y,” “ Y,” “ Y,” “ Y,” “ M”

3.787183,3.050337,13.2656620205808,3.420032,2.798141,4.40136882672889,0.935790725,4  
.048561,6.025204441,2.641511,4.932832,3.233073,3.655991,17.814338,3.26695431,4.08705  
956,5.288800635,2.386830383,2.249990323,2.625035537,3.689176086,2.379616045,3.33390

5178,2.869626414,3.102490146,3.141360211,5.553180196,3.450285116,2.923950489,3.5979

75287,7.685112844,"M," " M," " -," " M," " -," " M," " M," " Y," " Y," " M,"  
" M," " M," " M," " -," " M," " M," " Y," " M," " M," " M," " M," " Y,"  
" M," " M," " Y," " Y," " Y," " M," " Y," " Y," " Y," " Y," " -," " Y," " Y,"  
" M," " Y," " M," " Y,"  
" M," " M," " Y," " Y," " M," " -," " M," " -," " M," " M," " Y," " -," " Y,"  
" Y," " M," " M," " M," " M," " Y," " Y," " Y," " M," " M," " -," " Y," " Y,"  
" Y," " Y," " Y," " Y," " Y," " -," " Y," " -," " Y," " Y," " Y," " M," " Y,"  
" Y," " Y," " Y," " Y," " M," " M," " M," " Y," " -," " Y," " Y," " Y," " Y,"  
" Y," " -," " Y," " Y," " M," " M," " Y," " Y," " M," " -," " M," " Y," " -,"  
" -," " M," " M," " -," " M," " M," " Y," " Y," " M," " M," " M," " -," " Y,"  
" -," " -," " M," " M," " M," " M," " M," " -," " -," " M," " Y," " Y," " Y,"  
" Y," " -," " Y," " Y," " M," " M," " Y," " M," " M," " M," " M," " M," " M,"  
" M," " -," " M," " Y," " M,"  
" M," " M," " M," " M," " -," " -," " Y," " Y," " Y," " Y," " M," " Y," " Y,"  
" Y," " Y," " Y," " Y," " -," " Y," " Y," " Y," " Y," " Y," " M," " Y," " Y,"  
" Y," " Y," " Y," " Y," " Y," " Y," " Y," " Y," " Y," " Y," " M"

11.011924,7.940253,6.89473780830416,12.408034,8.634233,7.06075240080722,1.09024745  
3,7.066615,12.7739119,4.009807,5.522703,8.233135,7.89694,20,8.412622354,4.562755739,9  
.423271135,9.771152568,7.635123043,5.503388295,8.991895816,9.298698375,8.467756804,  
7.765575647,4.46777583,6.965729749,9.331413474,6.699191919,9.361929976,4.83187231

9,20,"Y," " Y," " Y," " Y," " -," " Y," " Y," " Y," " Y," " Y," " Y," " M,"  
" M," " -," " M," " Y," " M," " M," " -," " M," " M," " M," " Y," " M," " M,"  
" -," " -," " Y," " Y," " -," " M," " M," " M," " Y," " Y," " -," " M," " M,"  
" M," " M," " M," " M," " M," " M," " M," " M," " -," " -," " Y," " Y," " M,"  
" M," " M," " Y," " Y," " Y," " Y," " -," " M," " Y," " Y," " M," " M," " Y,"  
" Y," " Y," " Y," " -," " M," " Y," " -," " Y," " Y," " M," " -," " M," " M,"  
" M," " -," " M," " Y," " M," " -," " M," " Y," " Y," " Y," " Y," " M," " Y,"  
" Y," " Y," " -," " Y," " Y," " M," " M," " M," " M," " Y," " Y," " M," " M,"  
" -," " M," " M," " M," " Y," " Y," " Y," " M," " M," " M," " -," " M," " Y,"  
" Y," " Y," " Y," " Y," " -," " Y," " -," " -," " Y," " -," " Y," " M," " Y," " -  
," " M," " Y," " -," " -," " M," " M," " -," " M," " -," " M," " -," " M,"  
" M," " -," " M," " M," " M," " M," " M," " Y," " -," " Y," " Y," " Y," " Y,"  
" Y," " M," " M," " M," " M," " M," " -," " M," " M," " M," " M," " -," " -,"  
" Y," " Y," " Y," " M," " M," " M," " M," " M," " M," " Y," " Y," " -," " Y,"  
" M," " -," " -," " -," " -," " -," " Y," " Y," " M," " M," " M," " M," " M,"  
" M," " M," " M," " M"

5.126621,3.163557,6.28727691911575,2.917513,2.695481,4.5682345462235,0.812,4.3894,7.



260599533,2.884435,4.994988,3.821426,3.779509,6.596173,3.527259736,4.759852596,5.667  
194164,2.609002693,2.025072111,2.876720506,2.9832337,2.697422199,4.043725797,3.1164  
71347,3.143785334,3.535852845,6.279696452,3.307102463,3.126055048,3.47639955,8.2746

34782,"M," " M," " -," " Y," " -," " Y," " Y," " Y," " Y," " Y," " M," " Y,"  
" Y," " M," " M," " M," " M," " Y," " Y," " Y," " M," " M," " Y," " Y,"  
" Y," " Y," " Y," " M,"  
" M," " M," " M," " Y," " M," " Y,"  
" Y," " Y," " Y," " M," " M," " -," " M," " Y," " M," " -," " M," " M," " M,"  
" M," " Y," " M," " M," " M," " -," " M," " Y," " Y," " Y," " Y," " Y," " Y,"  
" Y," " Y," " Y," " Y," " Y," " Y," " Y," " -," " M," " M," " M," " Y," " Y,"  
" M," " M," " Y," " Y," " Y," " -," " -," " Y," " Y," " M," " M," " M," " M,"  
" M," " Y," " Y," " Y," " Y," " Y," " M," " M," " -," " M," " M," " M," " M,"  
" M," " M," " M," " Y," " M," " M," " M," " M," " M," " M," " Y," " Y,"  
" Y," " Y," " Y," " M," " Y," " Y," " Y," " -," " M," " M," " M," " M," " M,"  
" -," " Y," " M," " M," " -," " M," " Y," " Y," " Y," " M," " M," " M," " Y,"  
" Y," " Y," " Y," " Y," " Y," " Y," " Y," " Y," " Y," " Y," " Y," " Y,"  
" Y," " -," " Y," " M," " Y," " Y," " Y,"  
" Y," " -," " Y," " -," " Y,"  
" M," " M," " Y," " M," " M," " M," " M"

3.549424,3.052056,10.7299870321825,2.72519,2.792237,3.83745662745644,0.88992731,4.3  
13353,4.849474157,2.383006,4.867241,3.221049,3.58005,12.446413,3.27180583,4.12463126  
5,4.755105813,2.463067185,3.072845683,2.585657955,2.926629549,2.673785336,2.7018154  
99,2.886042353,2.925665385,2.970396486,6.503368003,3.277853601,2.675335671,3.202442

232,5.505872772,"Y," " M," " M," " M," " M," " M," " Y," " Y," " Y," " Y,"  
" Y," " M,"  
" Y," " Y," " M,"  
" M," " -," " Y," " M," " M," " M," " M,"  
" M," " Y," " Y," " -," " Y," " -," " Y," " M," " M," " M," " -," " -," " M,"  
" M," " M," " M," " M," " M," " Y," " Y," " -," " Y," " M," " M," " Y," " Y,"  
" -," " M," " M," " M," " Y," " -," " M," " -," " Y," " -," " Y," " -," " Y,"  
" M," " Y," " M," " Y," " Y,"  
" Y," " Y," " Y," " Y," " Y," " -," " M," " Y," " Y," " M," " M," " M," " M,"  
" M," " M," " M," " M," " -," " Y," " Y," " Y," " -," " Y," " -," " Y,"  
" Y," " Y," " Y," " Y," " Y," " -," " Y," " Y," " -," " -," " Y," " Y," " M,"  
" M," " M," " M," " -," " Y," " -," " M," " M," " -," " M," " -," " M," " M,"  
" M," " -," " Y," " Y," " Y," " Y," " Y," " M," " Y," " Y," " M," " M," " M,"  
" M," " Y," " M," " M," " M," " M,"  
" Y," " Y," " M," " M," " M," " M," " M," " Y," " Y," " Y," " M," " M,"

“ M,” “ M,” “ M,” “ M,” “ M,” “ M,” “ Y,” “ M,” “ M,” “ M”  
8.926001,6.090477,14.5779836153308,6.890284,6.00161,6.06304489253435,1.029113924,6.  
537018,9.89619416,3.666687,4.16917,6.874549,8.775029,9.266334,6.403216405,5.00231684  
9,9.222953141,4.916718218,7.055806838,4.589255372,9.954423599,5.56199838,16.6602392  
2,5.30246573,4.401594438,5.822731855,9.407419476,6.596141896,4.337907122,7.58341443  
1,20,"Y," “ -,” “ Y,” “ Y,” “ M,” “ Y,”  
“ Y,” “ Y,” “ Y,” “ Y,” “ Y,” “ Y,” “ Y,” “ Y,” “ M,” “ M,” “ Y,” “ Y,” “ M,”  
“-,” “ Y,” “ M,” “ M,” “ -,” “ M,” “ Y,”  
“ Y,” “ M,” “ M,” “ Y,” “ Y,” “ Y,” “ Y,” “ Y,” “ Y,” “ -,” “ Y,” “ Y,” “ -,”  
“ Y,” “ -,” “ M,” “ M,” “ M,” “ Y,” “ Y,”  
“ Y,” “ Y,” “ Y,” “ Y,” “ Y,” “ Y,” “ -,” “ Y,” “ M,” “ M,” “ M,” “ M,” “ M,”  
“ Y,” “ Y,” “ M,” “ M,” “ Y,” “ -,” “ Y,” “ -,” “ M,” “ M,” “ M,” “ M,” “ Y,”  
“ Y,” “ Y,” “ M,” “ M,” “ M,” “ M,” “ Y,” “ Y,” “ Y,” “ Y,” “ -,” “ Y,” “ Y,”  
“-,” “ Y,” “ M,” “ M,” “ Y,” “ -,” “ -,” “ Y,” “ -,” “ M,” “ M,” “ M,” “ M,”  
“-,” “ Y,” “ Y,” “ -,” “ -,” “ M,” “ -,” “ M,” “ M,” “ Y,” “ Y,” “ M,” “ Y,”  
“-,” “ Y,” “ Y,” “ Y,” “ -,” “ Y,” “ Y,” “ M,” “ M,” “ -,” “ M,” “ -,” “ M,”  
“ Y,” “ M,” “ -,” “ Y,” “ Y,” “ Y,” “ Y,”  
“ Y,” “ Y,” “ M,” “ M,” “ M,” “ M,” “ -,” “ M,” “ M,” “ M,” “ M,” “ M,” “ -,”  
“ M,” “ M,” “ M,” “ Y,” “ Y,” “ Y,” “ Y,” “ Y,” “ Y,” “ M,” “ M,” “ Y,” “ Y,”  
“ Y,” “ M,” “ M,” “ M,” “ M,” “ M,” “ Y,” “ M,” “ M,” “ M,” “ M,” “ M,”  
“ M,” “ M,” “ M,” “ M,” “ M”  
12.268414,7.232202,13.6454653381539,7.720336,7.078632,8.99403398569773,1.123003195,  
6.265905,10.1872419,4.185728,4.127064,8.568609,6.147707,20,9.348018191,3.671266797,9.  
231939247,5.079102484,6.740976406,3.992063072,6.082390885,6.742866388,20,6.7645377  
37,1.522920815,4.425788015,6.683508092,6.971260078,8.194794598,3.331226998,20,-,”  
“ Y,” “ -,” “ -,” “ -,” “ M,” “ -,” “ M,” “ M,” “ Y,” “ Y,” “ Y,” “ Y,” “ -,”  
“ Y,” “ Y,” “ Y,” “ M,” “ -,” “ M,” “ M,” “ M,” “ Y,” “ -,” “ -,” “ -,” “ M,”  
“ M,” “ M,” “ M,” “ Y,” “ Y,” “ Y,” “ M,” “ M,” “ -,” “ M,” “ M,” “ M,”  
“ M,” “ M,” “ M,” “ M,” “ Y,” “ Y,” “ Y,” “ -,” “ Y,” “ Y,” “ Y,” “ -,” “ M,”  
“ M,” “ M,” “ M,” “ M,” “ M,” “ M,” “ M,” “ M,” “ Y,” “ Y,” “ Y,” “ Y,”  
“ Y,” “ Y,” “ Y,” “ Y,” “ M,” “ M,” “ -,” “ M,” “ M,” “ M,” “ Y,” “ M,” “ M,”  
“ Y,” “ Y,” “ M,” “ M,” “ Y,” “ M,” “ M,” “ Y,” “ Y,” “ M,” “ M,” “ M,”  
“ M,” “ -,” “ M,” “ M,” “ M,” “ M,” “ -,” “ M,” “ M,” “ M,” “ -,” “ M,” “ M,”  
“ M,” “ Y,” “ M,” “ M,” “ Y,” “ -,” “ Y,” “ -,” “ M,” “ M,” “ M,” “ M,” “ M,”  
“ Y,” “ Y,” “ Y,” “ Y,” “ -,” “ -,” “ M,” “ Y,” “ M,” “ M,” “ M,” “ M,” “ M,”  
“ M,” “ M,” “ -,” “ M,” “ M,” “ Y,” “ Y,” “ Y,” “ Y,” “ Y,” “ M,” “ M,” “ M,”  
“ Y,” “ Y,” “ M,” “ Y,”

“ Y,” “ -,” “ Y,” “ Y,” “ Y,” “ Y,” “ Y,” “ M,” “ M,” “ M,” “ M,” “ Y,” “ Y,”  
“ M,” “ M,” “ M,” “ M,” “ Y,” “ Y,” “ -,” “ -,” “ M,” “ Y,” “ Y,” “ Y,” “ Y,”  
“ Y,” “ M,” “ Y,” “ Y,” “ Y,” “ Y”

10.942401,4.980577,10.4282650421286,6.659466,5.500839,5.70714802165739,1.116110305,  
3.921128,5.750735378,3.711632,5.033256,7.355263,5.718529,9.580306,5.624007068,4.2861  
89691,3.768539337,5.220959826,6.668341822,4.515280149,7.767333743,5.52839958,20,5.2  
72034592,0.433743455,5.509447773,8.375391409,6.069172351,5.090918873,5.208397546,5.

675028262,-,” “ M,” “ -,” “ -,” “ -,” “ M,” “ -,” “ Y,” “ Y,” “ Y,” “ Y,” “ Y,”  
“ Y,” “ -,” “ Y,” “ M,” “ M,” “ Y,” “ -,” “ M,” “ M,” “ -,” “ M,” “ -,” “ -,” “ -  
,” “ -,” “ M,” “ M,” “ -,” “ M,” “ M,” “ M,” “ M,” “ M,” “ Y,” “ Y,” “ Y,”  
“ Y,” “ Y,” “ Y,” “ Y,” “ Y,” “ Y,” “ Y,” “ Y,” “ -,” “ -,” “ Y,” “ -,” “ Y,”  
“ Y,” “ M,” “ M,” “ M,” “ M,” “ M,” “ Y,” “ M,” “ M,” “ Y,” “ M,” “ Y,”  
“ Y,” “ M,” “ -,” “ Y,” “ M,” “ -,” “ M,”  
“ Y,” “ -,” “ M,” “ M,” “ M,” “ Y,” “ M,” “ Y,” “ -,” “ -,” “ Y,” “ Y,” “ Y,”  
“ M,” “ Y,” “ Y,” “ M,” “ M,” “ M,” “ -,” “ -,” “ -,” “ M,” “ M,” “ -,” “ M,”  
“ M,” “ -,” “ M,” “ M,” “ M,” “ -,” “ M,” “ M,” “ Y,” “ M,” “ M,” “ M,” “ -,”  
“ M,” “ M,” “ Y,” “ Y,” “ Y,” “ M,” “ -,” “ -,” “ M,” “ M,” “ M,” “ M,” “ M,”  
“ M,” “ Y,” “ Y,” “ -,” “ -,” “ -,” “ -,” “ Y,” “ -,” “ Y,” “ Y,” “ Y,” “ Y,”  
“ Y,” “ Y,” “ Y,” “ Y,” “ -,” “ Y,” “ Y,” “ Y,” “ Y,” “ M,” “ M,” “ Y,” “ Y,”  
“ Y,” “ M,” “ M,” “ M,” “ M,” “ -,” “ -,” “ -,” “ -,” “ M,” “ M,” “ -,” “ M,”  
“ -,” “ M,” “ Y,” “ M,” “ Y,”  
“ Y,” “ M,”  
“ M,” “ M,” “ M,” “ M,” “ M,” “ M,” “ M”

## 2. Genotype and phenotype data for the MS cross

"Atenolol," " IsoproterenolHCl," " LiCl," " AntozolinHCl," " Molsidomine," " Cisplatin,"  
" 4-Methylpyrazole hydrochloride," " Nialamide," " Idazoxan hydrochloride,"  
" FluphenazinediHCl," " N-Ethylmaleimide," " DipropyldopamineHBr," " Menadione,"  
" H2O2," " Hydrocortisone 21-hemisuccinate sodium," " 1-[2-  
(Trifluoromethyl)phenyl]imidazole," " 9-Amino-1,2,3,4-tetrahydroacridine hydrochloride,"  
" Propafenone hydrochloride," " Minoxidil," " Acetylthiocholine chloride," " Cefmetazole  
sodium," " Phenylephrine hydrochloride," " Alprenolol hydrochloride," " Tiapride  
hydrochloride," " Benserazide hydrochloride," " Ethosuximide," " Aminoguanidine  
hemisulfate," " 2,3-Butanedione monoxime," " 1-(m-Chlorophenyl)-biguanide HCl,"  
" Cyproheptadine," " Palmitoyl-DL-Carnitine chloride," " M1\_1," " M1\_2," " M1\_3,"  
" M1\_4," " M2\_1," " M2\_2," " M2\_3," " M2\_4," " M2\_5," " M2\_6," " M2\_7,"  
" M2\_8," " M2\_9," " M2\_10," " M2\_11," " M2\_12," " M2\_13," " M3\_1," " M3\_2,"  
" M3\_3," " M3\_4," " M3\_5," " M4\_1," " M4\_2," " M4\_3," " M4\_4," " M4\_5,"

" M4\_6," " M4\_7," " M4\_8," " M4\_9," " M4\_10," " M4\_11," " M4\_12," " M4\_13,"  
" M4\_14," " M4\_15," " M4\_16," " M4\_17," " M4\_18," " M4\_19," " M4\_20,"  
" M4\_21," " M4\_22," " M4\_23," " M4\_24," " M4\_25," " M5\_1," " M5\_2," " M5\_3,"  
" M5\_4," " M5\_5," " M5\_6," " M5\_7," " M5\_8," " M5\_9," " M5\_10," " M6\_1,"  
" M6\_2," " M6\_3," " M6\_4," " M7\_1," " M7\_2," " M7\_3," " M7\_4," " M7\_5,"  
" M7\_6," " M7\_7," " M7\_8," " M7\_9," " M7\_10," " M7\_11," " M7\_12," " M7\_13,"  
" M7\_14," " M7\_15," " M7\_16," " M7\_17," " M7\_18," " M8\_1," " M8\_2," " M8\_3,"  
" M8\_4," " M8\_5," " M8\_6," " M8\_7," " M8\_8," " M8\_9," " M9\_1," " M9\_2,"  
" M9\_3," " M9\_4," " M9\_5," " M9\_6," " M9\_7," " M10\_1," " M10\_2," " M10\_3,"  
" M10\_4," " M10\_5," " M10\_6," " M10\_7," " M10\_8," " M10\_9," " M10\_10,"  
" M10\_11," " M10\_12," " M11\_1," " M11\_2," " M11\_3," " M11\_4," " M11\_5,"  
" M11\_6," " M11\_7," " M11\_8," " M11\_9," " M11\_10," " M11\_11," " M12\_1,"  
" M12\_2," " M12\_3," " M12\_4," " M12\_5," " M12\_6," " M12\_7," " M12\_8,"  
" M12\_9," " M12\_10," " M12\_11," " M12\_12," " M12\_13," " M12\_14," " M12\_15,"  
" M12\_16," " M12\_17," " M12\_18," " M13\_1," " M13\_2," " M13\_3," " M13\_4,"  
" M13\_5," " M13\_6," " M13\_7," " M13\_8," " M13\_9," " M13\_10," " M13\_11,"  
" M13\_12," " M13\_13," " M13\_14," " M13\_15," " M14\_1," " M14\_2," " M14\_3,"  
" M14\_4," " M14\_5," " M14\_6," " M14\_7," " M14\_8," " M14\_9," " M14\_10,"  
" M14\_11," " M14\_12," " M14\_13," " M15\_1," " M15\_2," " M15\_3," " M15\_4,"  
" M15\_5," " M15\_6," " M15\_7," " M15\_8," " M15\_9," " M15\_10," " M15\_11,"  
" M15\_12," " M15\_13," " M15\_14," " M15\_15," " M15\_16," " M15\_17," " M15\_18,"  
" M16\_1," " M16\_2," " M16\_3," " M16\_4," " M16\_5," " M16\_6," " M16\_7,"  
" M16\_8," " M16\_9," " M16\_10," " M16\_11," " M16\_12," " M16\_13," " M16\_14,"  
" M16\_15," " M16\_16"

,,,,,,,,,,,,,1,1,1,1,2,2,2,2,2,2,2,2,2,2,2,2,3,3,3,3,3,4,4,4,4,4,4,4,4,4,4,4,4,4,4,4,4,4,  
4,4,4,4,4,4,4,5,5,5,5,5,5,5,5,5,6,6,6,6,7,7,7,7,7,7,7,7,7,7,7,7,7,7,8,8,8,8,8,8,8,9,9,9,  
,9,9,9,9,10,10,10,10,10,10,10,10,10,10,10,10,11,11,11,11,11,11,11,11,11,11,11,12,12,12,12,12,  
,12,12,12,12,12,12,12,12,12,12,12,12,13,13,13,13,13,13,13,13,13,13,13,13,13,13,13,14,14,  
14,14,14,14,14,14,14,14,14,14,14,14,15,15,15,15,15,15,15,15,15,15,15,15,15,15,15,15,15,15,16,1  
6,16,16,16,16,16,16,16,16,16,16,16,16,16,16,16,16,16,16,16,16,16,16,16,16,16,16,16,16,16,  
,,,,,,,,,,,,,,,,,,,,,,,,,,,,,,,,,12.7,38.2,66.3,87.7,10.1,27.1,46.5,64.9,84.9,103.4,121.2,140,158.8,177.5,1  
96.3,215.4,233.8,15.9,43.9,74.8,105.2,137,9.3,27.7,46.7,66.6,83.8,104.3,124.9,141.7,166,180.  
9,198.7,217.7,236.7,255.7,274,296.1,314.5,331.6,351.3,368.7,390.5,407.9,425.4,446.2,464.6,1  
0.6,29.4,49.3,69.8,90,108.8,130.7,148.5,169,190.9,19.3,47.4,79.8,111.8,9.9,34.6,54.8,78.3,100  
,121.7,145.6,169.5,190.1,212.5,234.5,252.5,272.4,299.2,324.6,346.7,368.7,391.5,8.3,27.4,49.7  
,64.9,83.9,101.8,121.2,140.5,156,13.9,40.8,69.1,98.7,126.1,152.2,182.7,10.4,27.2,45,65.1,83.1  
,103.3,120.4,139.1,159.2,176.3,195.9,213.6,10.6,34.7,57,79.6,101.5,119.6,147.2,169.8,194.7,2  
18.1,240.8,12,31.4,50.8,74.2,97.6,118.1,138.9,157.9,182.4,204,225.5,247.4,268.3,290.2,311.8,



“ S,”  
“ S,” “ S,” “ S,” “ S,” “ S,” “ S,” “ S,” “ S,” “ S,” “ S,” “ S,” “ S,” “ S,”  
“ S,” “ S,” “ S,” “ S,” “ S,” “ S,” “ S,” “ S,” “ S,” “ S,” “ S,” “ S,” “ S,”  
“ S,” “ S,” “ S,” “ S,” “ S,” “ S,” “ S,” “ S,” “ S,” “ S,” “ S,” “ S,” “ S,”  
“ S,” “ S,” “ S,” “ S,” “ S,” “ S,” “ S,” “ S,” “ S,” “ S,” “ S,” “ S,” “ S,”  
“ S,” “ S,” “ S,” “ S,” “ S,” “ S,” “ S,” “ S,” “ S,” “ S”

9.967527,4.888709,4.41912174770593,11.595395,5.30139,8.30719525107735,4.090585081,5  
.839178,8.242386947,20,4.391121798,3.270217,8.780212,20,5.948884982,5.098514297,8.76  
5020109,7.915653736,4.917922656,5.26296248,9.144349534,5.375729367,20,4.625574518,0  
.971571655,0.83925352,6.294060021,5.105114315,5.319357218,3.735486519,6.149828185,"

M,” “ M,” “ M,” “ S,” “ M,” “ S,” “ S,” “ M,” “ M,” “ -,” “ S,” “ S,” “ -,”  
“ S,” “ S,” “ -,” “ S,” “ -,” “ M,” “ M,” “ -,” “ M,” “ S,” “ S,” “ M,” “ M,”  
“ M,” “ S,” “ S,” “ S,” “ S,” “ M,” “ S,” “ S,” “ S,” “ -,” “ -,” “ M,” “ M,”  
“ M,” “ M,” “ S,” “ S,” “ S,” “ M,” “ M,” “ S,” “ M,” “ S,” “ M,” “ M,” “ -,”  
“ S,” “ S,” “ S,” “ -,” “ M,” “ -,” “ S,” “ -,” “ S,” “ M,” “ M,” “ S,” “ S,”  
“ M,” “ M,” “ M,” “ S,” “ -,” “ S,” “ S,” “ S,” “ S,” “ S,” “ M,” “ M,” “ -,” “ -,”  
“-,” “ M,” “ S,” “ -,” “ S,” “ S,” “ -,” “ -,” “ S,” “ S,” “ S,” “ S,” “ M,” “ -  
,” “ S,” “ S,” “ S,” “ S,” “ M,” “ M,” “ S,” “ -,” “ M,” “ -,” “ M,” “ -,” “ S,”  
“ S,” “ S,” “ S,” “ -,” “ S,” “ -,” “ M,” “ M,” “ M,” “ M,” “ S,” “ S,” “ M,”  
“-,” “ -,” “ S,” “ S,” “ S,” “ -,” “ S,” “ -,” “ M,” “ M,” “ -,” “ -,” “ S,”  
“ M,” “ M,” “ M,” “ M,” “ M,” “ M,” “ S,” “ S,” “ S,” “ S,” “ -,” “ S,” “ -,”  
“ M,” “ -,” “ S,” “ S,” “ -,” “ M,” “ -,” “ M,” “ -,” “ -,” “ S,” “ -,” “ -,”  
“ S,” “ M,” “ M,” “ -,” “ -,” “ S,” “ -,” “ S,” “ M,” “ -,” “ S,” “ -,” “ M,”  
“ M,” “ M,” “ M,” “ M,” “ M,” “ M,” “ S,” “ S,” “ S,” “ -,” “ S,” “ S,” “ M,”  
“ M,” “ S,” “ S,” “ S,” “ M,” “ -,” “ M,” “ M,” “ S,” “ S,” “ S,” “ S,” “ M,”  
“ M,” “ M,” “ S”

6.476202,6.031374,4.15787743023523,6.518413,4.526803,9.7570341512314,4.090136712,8.  
899786,6.893725915,12.404647,4.33381734,5.734087,8.305218,6.554507,4.955620453,5.556  
490813,3.853229811,5.920637829,4.390371382,5.523719889,8.591634723,4.444598826,8.51  
6499815,5.795267468,0.720097004,1.032390452,7.714871267,6.11240926,5.947327489,4.5

13705685,4.903268992,"-,” “ S,” “ M,” “ M,” “ S,” “ S,” “ S,” “ S,” “ S,” “ S,”  
“ S,” “ S,” “ M,” “ M,” “ S,” “ M,” “ M,” “ -,” “ M,” “ S,” “ M,” “ M,” “ S,”  
“ M,” “ M,” “ M,” “ M,” “ M,” “ -,” “ M,” “ S,” “ S,” “ S,” “ S,” “ S,” “ -,”  
“ S,” “ S,” “ S,” “ M,” “ S,” “ S,” “ -,” “ S,” “ M,” “ M,” “ M,” “ S,” “ M,”  
“ M,” “ M,” “ S,” “ S,” “ S,” “ S,” “ S,” “ M,” “ M,” “ S,” “ S,” “ M,”  
“ M,” “ M,” “ S,” “ S,” “ M,” “ M,” “ M,” “ M,” “ M,” “ M,” “ S,” “ S,”  
“ S,” “ M,” “ M,” “ M,” “ M,” “ M,” “ S,” “ M,” “ S,” “ S,” “ S,” “ M,” “ M,”

“ M,” “ S,” “ M,” “ M,” “ S,” “ S,”  
“ S,” “ M,” “ M,” “ M,” “ M,” “ M,” “ S,” “ S,” “ S,” “ -,” “ S,” “ S,” “ M,”  
“ M,” “ M,” “ S,” “ S,” “ S,” “ S,” “ M,” “ M,” “ S,” “ -,” “ S,” “ M,” “ M,”  
“-,” “ -,” “ M,” “ S,” “ M,” “ -,”  
“ S,” “ S,” “ S,” “ S,” “ M,”  
“ M,” “ M,” “ M,” “ -,” “ M,” “ M,” “ M,” “ S,” “ S,” “ S,” “ S,” “ S,” “ S,”  
“ M,” “ M,” “ M,” “ M,” “ M,” “ M,” “ S,” “ S,” “ S,” “ M,” “ M,” “ M,”  
“ M,” “ M,” “ M,” “ M,” “ M,” “ M,” “ M,” “ M,” “ S,” “ S,” “ S,” “ S,”  
“ M,” “ S,” “ M,” “ M,” “ M,” “ M,” “ M,” “ M,” “ S,” “ M,” “ M,” “ M”

5.031077,3.499973,9.35668232941384,3.21949,3.485932,4.55165805215527,3.273437669,6.

092622,5.426171161,13.271193,3.179972714,4.580686,6.174241,4.325353,4.5394598,5.8100

73015,9.60464774,2.755709625,3.067702475,2.366526971,4.642872644,3.284628,3.9488223

49,3.226965515,0.888563273,0.886386345,3.853918029,4.665137369,3.436672142,2.613478

599,6.388993017,“M,” “ -,” “ S,” “ M,” “ S,” “ M,” “ M,” “ M,” “ M,” “ -,”

“ S,” “ S,” “ -,” “ S,” “ S,” “ S,” “ S,” “ -,” “ M,” “ M,” “ -,” “ M,” “ S,”

“ S,” “ M,” “ M,” “ M,” “ S,” “ S,” “ M,” “ M,” “ M,” “ M,” “ M,” “ M,”

“ M,” “ -,” “ M,” “ M,” “ M,” “ M,” “ S,” “ S,” “ S,” “ S,” “ S,” “ M,” “ M,”

“ S,” “ S,” “ S,” “ S,” “ S,” “ S,” “ M,” “ -,” “ S,” “ S,” “ S,” “ S,” “ M,”

“ S,” “ S,” “ S,” “ M,” “ M,” “ M,” “ S,” “ S,” “ M,” “ M,” “ -,” “ -,” “ S,”

“ S,” “ S,” “ M,” “ S,” “ -,” “ S,” “ -,” “ M,” “ -,” “ M,” “ M,” “ -,” “ S,”

“ S,” “ M,” “ S,” “ M,” “ M,” “ -,” “ S,” “ M,” “ M,” “ M,” “ M,” “ M,”

“ S,” “ M,” “ S,” “ -,” “ S,” “ -,” “ M,” “ M,” “ S,” “ S,” “ S,” “ -,” “ -,”

“ M,” “ M,” “ M,” “ -,” “ M,” “ M,” “ S,” “ S,” “ S,” “ M,” “ S,” “ S,” “ -,”

“ M,” “ M,” “ M,” “ S,” “ S,” “ S,” “ S,” “ M,” “ M,” “ -,” “ -,” “ M,” “ M,”

“ M,” “ M,” “ M,” “ S,” “ S,” “ S,” “ S,” “ -,” “ S,” “ S,” “ -,” “ M,” “ S,”

“ M,” “ -,” “ M,” “ -,” “ M,” “ S,” “ S,”

“ M,” “ M,”

“ S,” “ S,” “ S,” “ S,” “ S,” “ S,” “ M,” “ S,” “ M,” “ M,” “ M,” “ S,” “ S,”

“ S,” “ M,” “ M,” “ M,” “ M,” “ S,” “ S,” “ S,” “ S”

6.205185,4.7588,4.01012828927952,6.206144,4.913227,7.1582883678523,4.102884423,11.5

56533,9.918962281,8.123426,3.617813115,5.532132,5.404816,7.040875,7.984409327,5.9273

67462,10.19401389,3.62504794,4.614521503,2.39326532,6.323666149,4.160736115,7.81461

4529,4.250259556,0.113841384,0.564464174,5.340779609,7.151623152,4.921532959,2.7118

57509,7.799693864,“M,” “ S,” “ S,” “ S,” “ S,” “ S,” “ S,” “ M,” “ M,” “ M,”

“ M,” “ M,” “ -,” “ M,” “ M,” “ M,” “ S,” “ -,” “ M,” “ M,” “ M,” “ S,” “ S,”

“ M,” “ S,” “ S,” “ S,” “ M,” “ S,” “ S,” “ S,” “ M,” “ M,” “ M,” “ M,”

“ M,” “ -,” “ M,” “ S,” “ S,” “ M,” “ M,” “ M,” “ M,” “ S,” “ M,” “ M,”

“ S,” “ S,” “ S,” “ S,” “ M,” “ M,” “ S,” “ M,” “ M,” “ M,” “ M,” “ M,”

“ M,” “ M,” “ S,” “ M,” “ M,” “ M,”  
“ M,” “ S,” “ S,” “ S,” “ M,” “ M,” “ S,” “ S,” “ M,” “ M,” “ M,” “ M,”  
“ M,” “ M,” “ S,” “ S,” “ M,” “ M,” “ M,” “ S,” “ M,” “ M,” “ M,” “ M,”  
“ S,” “ S,” “ S,” “ S,” “ S,” “ M,” “ M,” “ S,” “ S,” “ M,” “ M,” “ M,” “ S,”  
“ S,” “ S,” “ M,” “ M,” “ M,” “ M,” “ M,” “ M,” “ S,” “ S,” “ M,” “ -,”  
“ M,” “ -,” “ M,” “ M,” “ -,” “ S,” “ S,” “ M,” “ S,” “ S,” “ S,” “ S,” “ S,”  
“ S,” “ M,” “ S,” “ S,” “ -,” “ M,” “ S,” “ M,” “ M,” “ M,” “ M,” “ M,”  
“ M,” “ M,” “ S,” “ M,” “ -,” “ M,” “ S,” “ -,” “ S,” “ S,” “ M,” “ S,” “ -,”  
“ S,” “ S,” “ -,” “ M,” “ M,” “ M,” “ M,” “ S,” “ M,” “ M,” “ M,” “ S,” “ S,”  
“ S,” “ M,” “ M,” “ M,” “ -,” “ M,” “ M,” “ M,” “ M,” “ M,” “ S,” “ -,” “ S,”  
“ S,” “ M,” “ S,”  
“ S,” “ S”

7.398833,4.665872,4.11577661656042,4.972528,4.108812,11.0363270812767,3.617597149,6  
.220949,9.408842976,9.528302,5.357060889,7.13045,9.928591,6.747064,4.544849175,7.146  
457987,9.659908203,3.686952464,4.320658162,3.924896797,6.445612323,4.753655092,7.60  
5726228,3.655304691,0.112676181,0.690695574,5.409336335,4.482145152,4.624185002,4.0

88387698,13.59624232,"S," “ S,” “ S,” “ M,” “ M,” “ M,” “ M,” “ S,” “ S,”  
“ S,” “ M,” “ -,” “ M,” “ M,” “ M,”  
“ S,” “ M,” “ S,” “ S,” “ S,”  
“ S,” “ S,” “ M,” “ M,” “ M,” “ M,” “ S,” “ S,” “ S,” “ M,” “ S,” “ S,”  
“ M,” “ M,” “ M,” “ M,” “ S,”  
“ S,” “ S,” “ M,” “ S,” “ M,”  
“ M,” “ M,” “ M,” “ M,” “ M,” “ S,” “ S,” “ S,” “ M,” “ M,” “ M,” “ M,”  
“ M,” “ M,” “ M,” “ S,” “ S,” “ M,” “ S,” “ M,” “ M,” “ M,” “ M,” “ M,”  
“ M,” “ S,” “ M,” “ S,” “ S,” “ S,” “ S,” “ S,” “ M,” “ M,” “ S,” “ S,” “ M,”  
“ S,” “ S,” “ S,” “ M,” “ M,” “ S,” “ M,” “ S,” “ S,” “ M,” “ M,” “ M,”  
“ M,” “ M,” “ M,” “ M,” “ -,” “ M,” “ M,” “ S,” “ M,” “ M,” “ M,” “ S,”  
“ S,” “ S,” “ S,” “ S,” “ S,” “ S,” “ S,” “ M,” “ S,” “ S,” “ M,” “ S,” “ M,”  
“ M,” “ M,” “ M,” “ M,” “ M,” “ M,” “ M,” “ -,” “ S,” “ S,” “ M,” “ M,”  
“ M,” “ M,” “ S,” “ S,” “ S,” “ S,” “ S,” “ M,” “ M,” “ M,” “ S,” “ S,”  
“ M,” “ M,” “ M,” “ M,” “ S,”  
“ M,” “ S,” “ S,” “ S,” “ S,” “ S,” “ M,” “ M,” “ M,” “ S,” “ S,” “ M,”  
“ M,” “ M,” “ M,” “ M”

5.775399,4.038051,4.04313311196973,4.132203,3.565029,4.80169882021135,3.099915162,5  
.622281,7.180689657,8.475127,3.74613592,5.006675,6.900724,6.255779,3.721210289,5.086  
814259,9.468674434,2.954920214,3.396937581,2.434278447,5.219374215,3.653318761,3.16  
1802985,3.161534692,0.510177512,0.604759258,4.532482198,4.536217191,4.4155378,2.962  
868496,12.8896404,"M," “ S,” “ S,” “ S,” “ M,” “ M,” “ M,” “ M,” “ M,” “ S,”



“ S,” “ S,” “ S,” “ S,” “ S,” “ S,” “ S,” “ S,” “ -,” “ S,” “ M,” “ -,” “ M,” “ S,”  
“ S,” “ S,” “ S,” “ S,” “ S,” “ S,” “ S,” “ M,” “ M,” “ M,” “ M,” “ M,”  
“ M,” “ M,” “ S,” “ S,” “ S,” “ S,” “ S,” “ S,” “ M,” “ S,” “ S,” “ S,” “ S,”  
“ S,” “ M,” “ M,” “ S,” “ S,” “ S,” “ S,” “ M,” “ M,” “ M,” “ M,” “ -,” “ M,”  
“ S,” “ S,” “ -,” “ M,” “ M,” “ S,” “ M,” “ M,” “ M,” “ M,” “ S,” “ S,” “ S,”  
“ S,” “ S,” “ S,” “ -,” “ S,” “ M,” “ S,”  
“ S,” “ M,” “ S,” “ M,” “ M,” “ M,” “ M,”  
“ M,” “ M,” “ M,” “ M,” “ M,” “ M,” “ M,” “ S,” “ S,” “ M,” “ -,” “ M,”  
“ S,” “ M,” “ -,” “ M,” “ M,” “ M,” “ M,”  
“ -,” “ S,” “ M,”  
“ S,” “ S,” “ S,” “ S,” “ S,” “ -,” “ -,” “ S,” “ S,” “ S,” “ M,” “ S,” “ -,”  
“ S,” “ S,” “ S,” “ -,” “ S,” “ M,” “ M,” “ S,” “ S,” “ S,” “ S,” “ -,” “ -,”  
“ -,” “ M,” “ S,” “ S,” “ S,” “ M,” “ M,” “ M,” “ M,” “ -,” “ M,” “ M,” “ S,”  
“ S,” “ M,” “ M,” “ M,” “ M,” “ -,” “ S,” “ M,” “ S,” “ M,” “ M,” “ M,”  
“ M,” “ M,” “ M,” “ M,” “ M,” “ S,” “ S,” “ S,” “ M,” “ M,” “ M”

10.657995,4.048709,6.77425459256889,20,4.40407,6.24582565881337,3.658557366,5.3465,  
11.88074056,20,3.508821912,7.985019,20,20,4.799992707,5.576907094,8.357433152,4.3737  
60417,4.431748225,4.946990089,9.811812934,4.848280747,20,3.775632084,1.089854257,0.

779637733,5.161369022,3.991613533,5.270254639,3.640831851,11.83445102,"M," " M,"  
“ M,” “ M,” “ M,” “ S,” “ S,” “ S,” “ S,” “ S,” “ M,” “ M,” “ S,” “ S,”  
“ M,” “ M,” “ S,” “ S,” “ M,” “ S,” “ S,” “ S,” “ M,” “ M,” “ M,” “ M,”  
“ M,” “ M,” “ M,” “ M,” “ S,” “ S,” “ S,” “ M,” “ M,” “ M,” “ M,” “ M,”  
“ M,” “ M,” “ M,” “ M,” “ S,” “ S,” “ M,” “ S,” “ S,” “ M,” “ M,” “ S,”  
“ S,” “ S,” “ S,” “ S,” “ S,” “ S,” “ S,” “ S,” “ S,” “ M,” “ M,” “ M,” “ M,”  
“ M,” “ S,” “ S,” “ S,” “ S,” “ S,” “ M,” “ M,” “ S,” “ M,” “ M,” “ M,”  
“ S,” “ M,” “ M,” “ M,” “ M,” “ M,” “ M,” “ S,” “ M,” “ S,” “ S,” “ M,”  
“ M,” “ M,” “ S,” “ M,” “ M,” “ S,” “ S,” “ M,” “ S,” “ M,” “ M,” “ M,”  
“ M,” “ M,” “ M,” “ M,” “ M,” “ M,” “ M,” “ M,” “ S,” “ S,” “ -,” “ S,” “ S,” “ S,”  
“ -,” “ M,” “ S,”  
“ S,” “ M,” “ S,” “ S,”  
“ M,” “ S,” “ M,” “ -,” “ M,”  
“ M,” “ M,” “ M,” “ M,” “ M,” “ M,” “ M,” “ M,” “ M,” “ M,” “ M,” “ M,”  
“ M,” “ M,” “ M,” “ M,” “ S,” “ S,” “ S,” “ S,” “ M,” “ S,” “ M,” “ S,”  
“ S,” “ S,” “ S,” “ S,” “ S,” “ S,” “ S,” “ S,” “ M,” “ M,” “ M,” “ S,” “ S”

10.366174,5.839817,9.56588156730703,6.809715,5.591899,7.41679992718419,5.088534003,  
6.856408,10.61583722,6.244569,5.654583436,7.592974,10.801972,16.33339,6.2682908,5.39  
8826514,8.814681301,4.881469235,5.232442974,4.598715144,8.851223294,5.340384078,7.4

72571819,5.720121276,1.097910228,1.03534886,6.653738671,6.246844846,5.393487339,5.1

37903776,9.007151309,"S," " S," " M," " S," " M," " S," " S," " M," " M,"  
" S," " -," " S," " S," " -," " S,"  
" S," " S," " M," " M,"  
" M," " S," " M," " M," " S,"  
" M," " S," " S," " S," " S," " S," " S," " M," " M," " S," " S," " S," " M,"  
" M," " M," " M," " S," " S," " S," " S," " S," " M," " S," " S," " M,"  
" M," " S," " S," " M," " S," " S,"  
" S," " S," " S," " S," " S," " S," " S," " M," " M," " M," " -," " S," " S,"  
" M," " M," " M," " M," " S," " M," " M," " M," " S," " S," " S," " S,"  
" S," " S," " -," " S," " M," " -," " S,"  
" M," " M," " -," " M," " M," " S,"  
" M," " M," " M," " M," " -," " M," " M," " M," " M," " -," " M," " S,"  
" M," " M," " M," " M," " S," " S," " S," " M," " M," " S," " S," " S,"  
" M," " M," " M," " -," " M," " M," " M," " M," " M," " M," " -," " S," " S,"  
" S," " M," " M," " S," " S"

8.580441,5.095917,4.37622038732879,20,4.898565,7.85100092788918,5.172021329,5.84689

2,7.656321335,20,3.528902354,7.94541,20,7.425592,6.010099177,5.255198306,9.45649533,  
5.155497868,4.724873998,4.737297909,9.217585224,5.505568001,20,4.320263276,0.934108  
145,0.900938537,6.324069407,4.7103632,5.840402108,3.763563526,11.21639314,"M,"

" M," " S," " M," " M," " S," " S," " S," " S," " -," " M," " S," " S," " S,"  
" M," " S," " S," " -," " S," " S," " S," " M," " M," " M," " M," " S," " S,"  
" S," " S," " S," " S," " -," " M," " M," " S," " S," " S," " M," " M," " M,"  
" M," " M," " M," " S," " S," " M," " S," " S," " S," " S," " M," " M,"  
" M," " S," " S," " M," " M," " M," " M," " M," " S," " M," " M," " S,"  
" M," " M," " M," " S," " M," " M,"  
" M," " M," " S," " S," " S," " S," " S," " M," " S," " S," " S," " S," " M,"  
" M," " -," " M," " M," " M," " M," " S," " M," " -," " M," " M," " M,"  
" M," " S," " S," " M," " M," " S," " S," " M," " S," " S," " S," " -," " M,"  
" M," " S," " M," " M," " S," " S," " S,"  
" M," " M," " M," " M," " M," " M," " S," " S," " S," " S," " M," " S,"  
" S," " -," " S," " S," " M," " M," " M," " M," " M," " -," " M," " M," " S,"  
" S," " S," " S," " M," " M," " M," " M," " M," " S," " S," " S," " S,"  
" M,"  
" S," " M," " M," " M," " M," " M," " S," " S," " S," " M"

7.397794,5.427047,8.56814416765028,10.680219,5.176595,5.83671911166017,4.773765115,

7.419425,9.477262518,20,6.067785922,6.302937,8.847321,7.694036,7.354076738,5.6033878  
88,11.17347155,3.628138941,4.788828186,3.657610133,7.654041108,5.167618846,11.66955  
72,5.118068783,0.652502599,0.847938669,6.145388548,5.919281133,5.63075299,3.8213260

7,7.790240227,"M," " M," " M," " M," " S," " M," " M," " M," " M," " M,"  
" M," " M," " -, " M," " M," " M," " M," " -, " S," " M," " M," " S," " S,"  
" S," " -, " M,"  
" M," " S," " M," " M," " S," " S," " M," " M," " M," " M," " M," " M,"  
" S," " M," " M," " S," " S," " S," " S," " S," " M," " M," " S," " S," " M,"  
" M," " S," " S," " S," " M," " -,  
" M," " S," " M," " M," " S," " S,"  
" S," " S," " S," " S," " M," " -, " S," " M," " S," " S," " S," " S," " S,"  
" S," " S," " S," " M," " M," " S," " S," " -, " -, " -, " -, " M," " M,"  
" M," " M," " M," " M," " M," " M," " M," " M," " S," " S," " S," " S," " -,  
" M," " M," " -, " M," " M," " -, " S,"  
" -, " M," " M," " M," " M," " M," " S,"  
" S," " S," " M," " M," " -, " M," " S," " M," " S," " M," " S," " M," " -,  
" M," " -, " M," " S," " S," " S," " S," " S," " S," " M," " M," " M," " M," " M,"  
" S," " S," " S," " S," " M,"  
" S," " S," " S," " S," " M," " M," " S," " S," " S," " S," " M," " M"

4.718847,3.403189,6.04099852205505,6.847201,3.72088,5.08310423018648,3.286529935,6.  
371362,5.124802482,20,4.08947774,4.14663,5.615161,10.202423,4.865603309,5.698181937,  
8.379181322,3.583331226,3.109151544,2.719997845,5.343993027,3.818984846,10.3594390  
7,3.314634827,0.96036036,0.873541609,3.851218034,4.3048271,3.335295033,3.125097647,

4.772112023,"M," " M," " S," " M," " M," " S," " S," " M," " M," " M," " M,"  
" M," " M," " M," " M," " M," " S," " -, " S," " S," " M," " M," " M,"  
" S," " S," " S," " S," " S," " M,"  
" S," " S," " S," " S," " M," " M," " M," " M," " S," " S," " S," " S," " M,"  
" S," " S," " M," " M," " M," " S," " M," " M," " S," " M," " S," " S,"  
" S," " M," " M," " S," " M," " M," " S," " S," " M," " M," " M," " M,"  
" M," " S," " M," " M," " S," " M," " S," " M,"  
" M," " M," " M," " S," " M," " M," " M," " M," " M," " S," " S," " S,"  
" S," " M," " M," " -, " M," " M," " S,"  
" M," " M," " M," " M," " -, " M," " -, " S," " S," " S," " M," " S," " S,"  
" S," " M," " M," " M," " -, " M," " M," " M," " M," " S," " M," " M,"  
" M," " M," " S," " -, " M,"  
" S," " M," " M," " M," " S," " M," " M," " M," " M," " S," " S," " M,"

“ M,” “ -,” “ S,”  
“ M”

11.615994,6.644631,5.20644699104094,20,6.296639,8.20106975070894,6.287187,9.144841,  
20,20,5.221844618,7.387853,9.609973,6.031095,7.594921997,7.338668531,5.028825946,5.8  
0187571,6.115657485,5.753631293,12.56043891,6.869062221,20,5.795379278,0.123673303,  
0.831665337,7.916138752,6.005911402,8.65120892,6.396792685,6.327643363,"S," “ -,”

“ S,” “ S,” “ S,” “ -,” “ S,” “ M,” “ S,” “ -,” “ M,” “ -,” “ S,” “ S,” “ S,”  
“ -,” “ S,” “ -,” “ M,” “ S,” “ M,” “ M,” “ -,” “ M,” “ M,” “ M,” “ M,” “ M,”  
“ M,” “ M,” “ M,” “ -,” “ M,”  
“ M,” “ M,” “ S,” “ M,” “ M,” “ S,” “ S,” “ M,” “ M,” “ S,” “ M,” “ M,”  
“ M,” “ M,” “ S,” “ S,” “ M,” “ M,” “ S,” “ S,” “ S,” “ S,” “ M,” “ S,”  
“ M,” “ S,” “ S,” “ S,” “ S,” “ M,”  
“ M,” “ M,” “ M,” “ M,” “ S,” “ S,” “ S,” “ S,” “ M,” “ S,” “ S,”  
“ S,” “ S,” “ S,” “ S,” “ S,” “ M,” “ S,” “ M,” “ M,” “ M,” “ S,” “ M,”  
“ M,” “ M,” “ M,” “ M,” “ S,” “ M,”  
“ M,” “ M,” “ M,” “ M,” “ M,” “ M,” “ M,” “ -,” “ M,” “ S,” “ S,” “ M,” “ -,”  
“ S,” “ S,” “ S,” “ S,” “ S,” “ S,” “ M,” “ M,” “ S,” “ S,” “ S,” “ M,” “ M,”  
“ M,” “ -,” “ M,” “ -,” “ M,” “ M,” “ -,” “ M,” “ M,” “ M,” “ S,” “ S,” “ S,”  
“ M,” “ -,” “ M,” “ M,” “ M,” “ S,” “ S,” “ S,” “ S,” “ -,” “ M,” “ M,” “ -,”  
“ S,” “ S,” “ S,” “ S,” “ M,” “ S,”  
“ S,” “ S,” “ S,” “ M,” “ M,” “ M,” “ M,” “ M,” “ M,” “ -,” “ M,” “ M,”  
“ M,” “ M,” “ M,” “ M,” “ M,” “ M,” “ M,” “ M,” “ M,” “ M,” “ S”

5.417762,3.741715,2.6530964762028,4.692613,5.095575,8.34765565072708,7.37101488,2.6  
46821,7.988593863,9.674612,2.87391407,2.868791,20,13.793909,4.910370634,2.600964708,  
7.101254311,2.788799006,3.532297105,1.689344715,3.456018602,3.398479879,5.53944709  
7,3.10517637,0.576615436,0.812580908,3.898262816,4.21963817,3.893296385,8.57512939,  
5.652836026,"S," “ S,” “ S,”

“ S,” “ S,” “ S,” “ S,” “ S,” “ M,” “ -,” “ M,” “ M,” “ -,” “ S,” “ M,” “ S,”  
“ S,” “ S,” “ S,” “ S,” “ S,” “ S,” “ S,” “ S,” “ S,” “ S,” “ S,” “ S,” “ -,”  
“ M,” “ M,” “ M,” “ S,” “ M,” “ M,”  
“ M,” “ M,” “ M,” “ M,” “ M,” “ M,” “ M,” “ M,” “ S,” “ S,” “ S,” “ M,”  
“ S,” “ M,” “ S,” “ S,” “ S,” “ M,” “ M,” “ S,” “ S,” “ M,” “ M,” “ -,” “ S,”  
“ S,” “ S,” “ S,” “ S,” “ S,” “ M,” “ S,” “ M,” “ M,” “ M,” “ M,” “ M,”  
“ S,” “ M,” “ M,” “ -,” “ S,” “ -,” “ M,” “ M,” “ S,” “ M,” “ S,” “ -,” “ S,”  
“ S,” “ S,” “ M,” “ M,” “ M,” “ M,” “ M,” “ M,” “ -,” “ S,” “ S,” “ M,”  
“ M,” “ S,” “ S,” “ S,” “ M,” “ M,” “ S,” “ S,” “ S,” “ S,” “ S,” “ M,” “ M,”  
“ -,” “ M,” “ M,” “ -,” “ M,” “ M,” “ S,” “ S,” “ S,” “ S,” “ S,” “ S,” “ M,”  
“ S,” “ S,” “ S,” “ S,” “ S,” “ M,” “ M,” “ M,” “ M,” “ S,” “ S,” “ S,” “ S,”

“ M,” “ M,” “ -,” “ M,” “ S,” “ M,” “ S,” “ S,” “ S,” “ S,” “ S,” “ M,” “ S,”  
“ M,” “ S,” “ S,” “ M,” “ M,” “ M,” “ M,” “ M,” “ M,” “ S,” “ S,” “ S,”  
“ S,” “ S,” “ S,” “ S,” “ M,” “ M,” “ S,” “ M,” “ S,” “ M,” “ M,” “ S,”  
“ M,” “ S,” “ M,” “ S”  
4.164911,3.344359,6.98982821820048,2.975367,3.574291,5.17379392799894,3.265764491,6  
.152705,7.516258846,11.053799,4.120258108,4.071056,6.217412,7.433967,4.458481518,4.1  
12781963,7.705315373,2.811116781,3.351931692,2.761830262,4.237037634,3.299297361,3.  
164792108,3.395872428,0.869762649,0.885322258,5.052868864,4.287083925,3.831841669,  
2.926934626,5.771556462,“M,” “ M,” “ M,” “ M,” “ M,” “ M,” “ S,” “ S,” “ S,”  
“ S,” “ S,” “ S,” “ S,” “ M,” “ M,” “ M,” “ S,” “ S,” “ M,” “ M,” “ -,” “ S,”  
“ M,” “ M,” “ M,” “ M,” “ M,” “ S,” “ M,” “ M,” “ M,” “ S,” “ S,” “ S,”  
“ S,” “ S,” “ S,” “ M,” “ M,” “ M,” “ M,” “ M,” “ M,” “ S,” “ S,” “ S,”  
“ S,” “ M,” “ M,” “ -,” “ M,” “ S,” “ S,” “ M,” “ M,” “ M,” “ S,” “ M,” “ S,”  
“ S,” “ S,” “ S,” “ S,” “ S,” “ S,” “ -,” “ S,” “ M,” “ M,” “ M,” “ S,” “ S,”  
“-,” “ S,” “ M,” “ M,” “ M,” “ M,” “ S,” “ S,”  
“-,” “ M,” “ M,” “ S,” “ S,” “ M,” “ M,” “ M,” “ S,” “ S,” “ S,” “ M,” “ S,”  
“ M,” “ S,” “ -,” “ S,” “ S,”  
“ S,” “ S,” “ S,” “ S,” “ S,” “ M,” “ M,” “ M,” “ S,” “ S,” “ M,” “ S,” “ S,”  
“ M,” “ M,” “ -,” “ S,” “ S,” “ M,”  
“ S,” “ S,” “ S,” “ S,” “ S,” “ M,” “ M,” “ S,” “ S,” “ M,” “ M,” “ M,”  
“ M,” “ S,” “ S,” “ S,” “ S,” “ S,” “ -,” “ S,” “ M,” “ M,” “ M,” “ M,” “ S,”  
“ S,” “ -,” “ S,” “ S,” “ S,” “ M,” “ M,” “ M,” “ S,” “ S,” “ M,” “ S,” “ S,”  
“ S,” “ S,” “ S,” “ M,” “ M,” “ M,” “ M,” “ M,” “ S,” “ S,” “ -,” “ -,” “ -,”  
“ M,” “ M,” “ -,” “ S,” “ M,” “ M,” “ M,” “ M,” “ M,” “ S,” “ S,” “ S,” “ S”  
8.452926,4.556518,8.00060959883795,10.424851,4.610141,5.97307866953458,3.736753824,  
10.736049,8.489692227,20,4.693497396,5.984584,20,7.220621,5.843796082,6.149220691,9.  
271620508,3.648102598,4.009780763,2.867924274,10.25137814,4.890311456,20,3.9967052  
46,0.984614244,0.600513259,5.544330374,5.250171215,4.397449395,3.448579883,13.94866  
672,“M,” “ S,” “ S,” “ M,” “ S,” “ S,” “ M,” “ S,” “ M,” “ S,” “ S,” “ S,”  
“ S,” “ S,” “ S,” “ M,” “ M,” “ -,” “ M,” “ M,” “ -,” “ M,” “ M,” “ M,” “ M,”  
“ S,” “ S,” “ S,” “ S,” “ S,” “ M,” “ M,” “ M,” “ S,” “ S,” “ S,” “ S,” “ S,”  
“ S,” “ S,” “ S,” “ S,” “ S,” “ S,” “ S,” “ M,” “ M,” “ S,” “ S,” “ S,” “ S,”  
“ S,” “ S,” “ M,” “ M,” “ M,” “ M,” “ S,” “ S,” “ S,” “ S,” “ M,” “ S,” “ S,”  
“ S,” “ M,” “ S,” “ M,” “ M,” “ M,” “ M,”  
“ M,” “ M,” “ M,” “ M,” “ M,” “ M,” “ M,” “ S,” “ S,” “ S,” “ S,” “ S,”  
“ M,” “ S,” “ M,” “ M,”  
“ M,” “ M,” “ S,” “ M,” “ M,” “ M,” “ S,” “ S,” “ S,” “ S,” “ S,” “ S,”  
“ M,” “ M,” “ M,” “ S,” “ S,” “ M,” “ -,” “ M,” “ -,” “ M,” “ S,” “ -,” “ M,”

" S," " S," " S," " S," " S," " -," " S," " S," " M," " M," " M," " M," " M,"  
" M," " M," " M," " M," " M," " S," " S," " S," " S," " M," " S," " S,"  
" S," " -," " S," " S," " M," " M," " M," " S," " S," " -," " S," " M," " M,"  
" S," " M," " M," " S," " S," " S," " M,"  
" M," " S," " S," " S," " S," " M," " S," " -," " M," " S," " M," " M," " M,"  
" M," " S," " S," " S," " M," " S," " S," " M"

5.426562,3.294127,2.93947673103807,3.589275,3.457196,5.59124713302531,3.12391146,6.  
075476,6.716906462,11.524231,3.207434545,7.150087,5.584569,4.658553,5.104493194,4.43  
7575707,9.628154194,2.580539124,3.349809398,2.067377427,4.674579445,3.527991196,4.2

60523462,3.272664759,0.106896735,0.645311218,4.150519997,4.250285237,4.137204782,2.  
80175211,11.21995514,"M," " S," " S," " S," " M," " S," " M," " M," " M," " -  
, " S," " -," " M," " S," " S," " M,"  
" M," " M," " M," " M," " M," " S,"  
" S," " M," " S," " S," " S," " S," " S,"  
" M," " S," " S," " S," " -," " S," " S," " S," " S," " S," " M," " M," " M,"  
" M," " S," " S," " S," " M," " M," " M," " M," " M," " S," " S," " S,"  
" S," " S," " -," " M," " -," " M," " S," " M," " S," " S," " S," " S," " S,"  
" M," " S," " S," " M," " M," " S,"  
" S," " S," " M," " S," " S," " M," " M," " S," " S," " S," " S," " M," " M,"  
" S," " S," " S," " M," " M," " S," " M," " M," " M," " M," " M," " -,"  
" M," " M," " -," " S," " M," " M," " -," " M," " M," " -," " S," " S," " M,"  
" M," " M," " S," " S," " S," " S," " M," " M," " S," " M," " S," " M,"  
" M," " M," " M," " S," " M," " -," " M," " M," " M," " M," " M," " S,"  
" S," " M," " S," " S," " S,"  
" M," " M," " M," " M," " M," " S," " S," " M," " M," " M," " S," " S,"  
" S," " M," " M," " S," " M," " M," " M," " M," " M," " S," " S," " S,"  
" S," " M," " S"

13.066303,6.766826,3.52013150032919,7.757869,6.412014,8.50576226480778,4.588015681,  
8.570596,11.39662063,16.486556,4.361190806,12.058815,9.492107,7.025451,8.461874488,6  
.719059846,5.261199785,4.850684836,5.678783996,4.035316067,10.31787248,6.23849809,8

.876857341,5.835703106,0.834450637,1.183115588,6.818150026,7.520303505,6.366440879,  
4.376086768,15.35075508,"S," " S," " M," " -," " M," " M," " M," " S," " S," " -  
, " S," " S," " -," " S," " S," " -," " S," " -," " M," " M," " -," " S," " M,"  
" M," " M," " M," " M," " S," " S," " S," " S," " -," " -," " M," " M," " M,"  
" M," " M," " M," " S," " M," " S," " M,"  
" M," " S," " S," " S," " -," " S," " S," " S," " M," " S," " -," " S," " S,"  
" S," " S," " M," " M," " M," " M," " M," " -," " M," " M," " -," " M," " M,"  
" M," " M," " S," " S," " S," " M," " M," " S," " S," " S," " M," " M,"

“ M,” “ S,” “ -,” “ S,” “ M,” “ M,” “ S,” “ M,” “ -,” “ S,” “ S,” “ S,” “ S,”  
“ -,” “ M,” “ -,” “ M,” “ M,” “ M,” “ M,” “ S,” “ S,” “ -,” “ M,” “ M,” “ M,”  
“ M,” “ M,” “ -,” “ S,” “ S,” “ M,” “ -,” “ -,” “ -,” “ S,” “ S,” “ -,” “ S,”  
“ S,” “ M,” “ M,” “ M,” “ M,” “ M,” “ -,” “ M,” “ S,” “ S,” “ S,” “ -,” “ -,” “ -,”  
“ S,” “ S,” “ S,” “ S,” “ S,” “ -,” “ M,” “ M,” “ -,” “ M,” “ S,” “ M,” “ -,”  
“ -,” “ S,” “ S,” “ M,” “ S,” “ -,” “ S,” “ -,” “ -,” “ M,” “ S,” “ M,” “ S,”  
“ S,” “ S,” “ S,” “ M,” “ M,” “ M,” “ M,” “ S,” “ S,” “ S,” “ -,” “ M,” “ M,”  
“ M,” “ M,” “ M,” “ S,” “ -,” “ S,” “ S,” “ S,” “ S,” “ -,” “ S,” “ S,” “ S,”  
“ S,” “ S,” “ M,” “ M,” “ M,” “ M,” “ S”

7.94468,5.278897,7.67633370072429,4.199449,4.511524,6.34760204773445,4.513290451,8.  
259679,9.901956409,15.490202,4.998468777,7.301712,7.278601,4.740812,5.670093129,4.58  
4632169,7.111964752,3.079010866,4.123967227,3.356190156,9.256525586,5.320190244,7.6  
15614249,4.376151857,0.895259842,0.961232022,6.487477378,5.393332384,4.361406049,2.

914031806,10.44253149,"S," “ S,” “ S,” “ S,” “ M,” “ M,” “ M,” “ M,” “ M,”  
“ S,” “ M,” “ -,” “ M,” “ M,” “ S,”  
“ S,” “ S,” “ M,” “ M,” “ M,” “ S,” “ S,” “ S,” “ S,” “ M,” “ M,” “ M,”  
“ S,” “ S,” “ S,” “ M,” “ M,” “ M,” “ M,” “ M,” “ S,” “ S,” “ M,” “ M,”  
“ S,” “ M,” “ M,” “ M,” “ S,”  
“ M,” “ M,” “ M,” “ S,” “ S,” “ S,” “ S,” “ M,” “ M,” “ M,” “ M,” “ M,” “ M,”  
“ M,” “ M,” “ M,” “ M,” “ M,” “ M,” “ M,” “ M,” “ M,” “ M,” “ M,” “ M,”  
“ S,” “ M,” “ M,” “ M,” “ M,” “ S,”  
“ S,” “ S,” “ S,” “ S,” “ M,”  
“ S,” “ S,” “ M,” “ S,” “ M,”  
“ M,” “ S,” “ S,” “ S,” “ S,” “ S,” “ -,” “ S,” “ S,” “ S,” “ M,” “ M,” “ S,” “ S,”  
“ S,” “ S,” “ S,” “ M,” “ M,” “ M,” “ M,” “ S,” “ M,” “ S,” “ S,” “ S,”  
“ S,” “ M,” “ M,” “ M,” “ S,” “ S,” “ S,” “ -,” “ S,” “ S,” “ M,” “ S,” “ M,”  
“ M,” “ M,” “ -,” “ S,”  
“ S,” “ S,” “ M,” “ S,” “ S,” “ M,”  
“ M,” “ S,” “ S,” “ S,” “ S,” “ M,” “ S,” “ S,” “ -,” “ M,” “ S,” “ S,” “ S,”  
“ M,” “ S”

9.871062,5.036945,4.08120894041416,9.402806,3.549253,9.62614702307451,4.586484277,5  
.548518,9.797314075,13.656795,3.884378388,7.823532,8.646232,4.35846,5.072772213,4.69  
2024667,8.52566027,5.206914858,4.485587253,4.306576045,12.03350513,5.544305292,11.1  
819139,4.228883972,0.923535792,0.738413169,6.176409162,4.573234351,6.450577776,3.73

0434161,9.694706584,"S," “ M,” “ M,” “ S,” “ M,” “ M,” “ S,” “ S,” “ S,” “ -,”  
“ S,” “ S,” “ -,” “ M,” “ M,” “ S,” “ S,” “ -,” “ M,” “ M,” “ -,” “ M,” “ -,”  
“ M,” “ M,” “ S,” “ S,” “ M,” “ M,” “ M,” “ S,” “ -,” “ M,” “ S,” “ S,” “ S,”  
“ S,” “ M,” “ M,” “ M,” “ S,” “ S,” “ M,” “ M,” “ M,” “ M,” “ M,” “ M,” “ S,”

“ S,” “ S,” “ S,” “ S,” “ S,” “ S,” “ S,” “ S,” “ S,” “ S,” “ M,” “ M,” “ S,” “ S,”  
“ M,” “ M,” “ S,” “ M,” “ M,” “ M,” “ M,” “ S,” “ -,” “ S,” “ M,” “ M,”  
“ M,” “ M,” “ M,” “ M,” “ S,” “ S,” “ M,” “ S,” “ S,” “ S,” “ S,” “ S,” “ S,”  
“ S,” “ M,” “ M,” “ S,” “ S,” “ M,” “ S,” “ S,” “ M,” “ M,” “ M,” “ M,”  
“ S,” “ S,” “ -,” “ S,” “ -,” “ S,” “ M,” “ M,” “ M,” “ S,” “ S,” “ S,” “ S,”  
“ S,” “ S,” “ -,” “ S,” “ M,” “ M,” “ M,” “ M,” “ -,” “ M,” “ M,” “ M,” “ M,”  
“ -,” “ M,” “ M,” “ S,” “ M,” “ M,” “ M,” “ M,” “ S,” “ S,” “ S,” “ S,” “ M,”  
“ S,” “ S,” “ S,” “ S,” “ M,” “ M,” “ M,” “ -,” “ S,” “ S,” “ S,” “ M,” “ M,”  
“ S,” “ S,” “ -,” “ M,” “ S,” “ M,” “ M,” “ M,” “ M,” “ M,” “ -,” “ M,” “ S,”  
“ S,” “ S,” “ S,” “ S,” “ M,” “ M,” “ S,”  
“ S,” “ S,” “ S,” “ M,” “ M,” “ M,” “ S,” “ S,” “ M,” “ M,” “ M,” “ M,”  
“ M,” “ S,” “ S,” “ S,” “ M,” “ M,” “ M,” “ S,” “ S,” “ S”

6.579732,3.337781,8.73905477117025,8.345329,6.210457,6.7474729420095,3.914580642,9.  
937898,8.479774744,20,3.663880919,5.379538,5.276077,13.919208,6.076900462,6.5517772  
36,7.416701617,2.960509156,4.674597799,1.532866633,5.388327015,4.688598508,4.307858  
803,3.210751218,0.135162984,0.746466566,4.468492645,5.196866467,5.841611102,3.16225

5895,10.88975834,"M," " M," " M," " M," " S," " S," " S," " S," " S," " S,"  
“ S,” “ S,” “ S,” “ M,” “ M,” “ S,” “ S,” “ -,” “ S,” “ M,” “ -,” “ M,” “ S,”  
“ M,” “ M,” “ S,” “ S,” “ M,” “ M,” “ M,” “ M,” “ M,” “ M,” “ S,” “ S,”  
“ S,” “ M,” “ S,” “ S,” “ S,” “ S,” “ M,” “ M,” “ M,” “ M,” “ M,” “ M,”  
“ M,” “ S,” “ S,” “ M,” “ M,” “ S,” “ S,” “ S,” “ S,” “ S,” “ M,” “ S,” “ S,”  
“ M,” “ M,” “ M,” “ S,” “ M,” “ M,” “ M,” “ S,” “ S,” “ M,” “ M,” “ M,”  
“ M,” “ M,” “ S,” “ S,” “ S,” “ S,” “ M,” “ M,” “ M,” “ M,” “ S,” “ S,”  
“ S,” “ S,” “ M,” “ M,” “ S,” “ S,” “ M,” “ S,” “ M,” “ M,” “ M,” “ S,”  
“ S,” “ S,” “ S,” “ S,” “ -,” “ S,” “ S,” “ S,” “ S,” “ M,” “ S,” “ M,” “ S,”  
“ S,” “ M,” “ M,” “ M,” “ M,” “ M,” “ S,” “ S,” “ S,” “ S,” “ M,” “ M,”  
“ M,” “ S,” “ S,” “ -,” “ S,” “ S,” “ M,” “ S,” “ S,” “ M,” “ M,” “ M,” “ M,”  
“ M,” “ M,” “ M,” “ M,” “ M,” “ M,” “ M,” “ M,” “ M,” “ M,” “ M,” “ M,”  
“ S,” “ S,” “ M,” “ M,” “ M,” “ S,” “ -,” “ S,” “ -,” “ -,” “ S,” “ M,” “ M,”  
“ M,” “ M,” “ M,” “ M,” “ -,” “ S,” “ S,” “ M,” “ M,” “ M,” “ M,” “ M,”  
“ M,” “ M,” “ M,” “ M,” “ M,” “ M,” “ M,” “ -,” “ M,” “ S,” “ M,” “ -,” “ -,”  
“ M,” “ M,” “ S,” “ M,” “ M,” “ M,”  
“ S”

5.844561,4.459774,7.32572661217074,4.813785,4.836281,4.69105904188234,3.8687014,9.6  
82353,6.620790401,8.053938,4.376151533,5.772594,7.876241,8.706484,8.60295936,4.19747  
7042,10.29356127,3.476296111,3.331073673,3.047027719,6.198010233,5.054479174,6.6824  
53401,3.476532883,0.130763149,0.551683168,4.555884133,5.651988918,5.130922989,3.033  
787095,9.908373479,"M," " S," " S," " S," " S," " S," " M," " M," " M," " -,”



“ M,” “ M,” “ -,” “ M,” “ M,” “ M,” “ S,” “ -,” “ S,” “ S,” “ S,” “ S,” “ S,”  
“ S,” “ -,” “ S,” “ M,” “ S,” “ S,” “ S,” “ M,” “ M,” “ M,” “ M,” “ M,” “ M,”  
“ S,” “ M,” “ M,” “ M,” “ M,” “ S,”  
“ S,” “ S,” “ S,” “ S,” “ S,” “ M,” “ M,” “ S,” “ M,” “ M,” “ M,” “ S,” “ S,”  
“ S,” “ M,” “ M,” “ M,” “ S,” “ S,” “ M,” “ M,” “ M,” “ M,” “ M,” “ M,”  
“ S,” “ M,” “ M,” “ M,” “ S,” “ S,” “ M,” “ M,” “ M,” “ M,” “ M,” “ M,”  
“ M,” “ M,” “ M,” “ M,” “ S,” “ M,” “ M,” “ M,” “ S,” “ S,” “ S,” “ M,”  
“ M,” “ M,” “ M,” “ M,” “ S,” “ S,” “ S,” “ S,” “ S,” “ -,” “ S,” “ M,” “ M,”  
“-,” “ M,” “ M,” “ S,” “ S,” “ M,”  
“ S,” “ S,” “ S,” “ S,” “ M,” “ S,”  
“ S,” “ M,” “ S,” “ M,” “ -,” “ M,” “ M,” “ M,” “ M,” “ S,” “ S,” “ S,” “ -,”  
“ M,” “ M,” “ M,” “ M,” “ M,” “ M,” “ S,” “ M,” “ M,” “ M,” “ M,” “ M,”  
“ S,” “ S,” “ S,” “ S,” “ M,” “ M,” “ M,” “ S,” “ S,” “ S,” “ -,” “ -,” “ -,”  
“ M,” “ -,” “ M,” “ S,” “ S,” “ M”

10.403876,6.206741,4.86177994096703,11.110231,6.114973,6.28290133099242,5.60529932  
6,10.174867,12.14419058,20,5.224676641,10.169558,8.152558,6.693011,8.130535751,5.713  
949922,11.36159873,4.98305911,5.434132592,3.991465666,10.32689644,6.274844987,20,4.  
398451116,0.823631296,0.373149829,9.35170648,7.500163871,7.160701044,4.463692127,2  
0,"M," “ M,” “ M,” “ M,” “ S,” “ S,” “ S,” “ S,” “ S,” “ M,” “ M,” “ M,” “ -  
,” “ M,” “ M,” “ M,” “ M,” “ S,” “ S,” “ S,” “ S,” “ M,” “ M,” “ M,” “ M,”  
“ M,” “ M,” “ S,” “ S,” “ S,” “ S,” “ -,” “ M,” “ M,” “ M,” “ S,” “ S,” “ S,”  
“ S,” “ M,” “ S,” “ M,” “ M,” “ M,” “ S,” “ M,” “ M,” “ M,” “ S,” “ S,”  
“ S,” “ S,” “ S,” “ S,” “ S,” “ S,” “ S,” “ S,” “ S,” “ S,” “ S,” “ M,” “ S,”  
“ S,” “ S,” “ M,” “ M,” “ M,” “ S,” “ S,” “ S,” “ S,” “ M,” “ M,” “ M,”  
“ S,” “ S,” “ S,” “ S,” “ M,” “ M,” “ M,” “ M,” “ S,” “ S,” “ S,” “ S,” “ S,”  
“ M,” “ M,” “ M,” “ S,” “ M,” “ M,” “ S,”  
“ S,” “ S,” “ S,” “ S,” “ S,” “ S,” “ S,” “ S,” “ S,” “ S,” “ S,” “ S,” “ S,”  
“ M,” “ M,” “ M,” “ S,” “ M,” “ S,” “ S,” “ S,” “ S,” “ M,” “ -,” “ S,” “ S,”  
“ S,” “ M,” “ M,” “ M,” “ M,” “ S,” “ S,” “ M,” “ M,” “ M,” “ M,” “ M,”  
“ M,” “ M,” “ S,” “ M,” “ S,” “ S,” “ S,”  
“-,” “ S,” “ S,” “ M,” “ S,” “ S,” “ -,” “ S,” “ -,” “ M,” “ S,” “ S,” “ S,”  
“ M,” “ S,” “ S,” “ S,” “ S,” “ M,”  
“ M,” “ M,” “ M,” “ M,” “ M,” “ S,” “ M,” “ M,” “ S,” “ S,” “ S,” “ S,”  
“ S,” “ M,” “ -,” “ M,” “ M,” “ M,” “ M,” “ M,” “ M”

8.839202,4.717439,3.22357468126549,20,4.792192,9.04086466183131,3.781739873,6.98491  
,9.988410097,20,3.845692888,8.210266,9.266538,6.612365,6.484161219,6.398511146,11.64  
723555,5.808538678,4.765721655,5.3063306,11.31406433,5.529493725,20,5.383048404,0.5

50339263,1.066468003,4.867017157,5.773121177,6.582608475,5.963108326,10.64356179,"  
M," " M," " M," " S," " M," " M," " S,"  
" S," " S," " S," " M," "-", " M," " M," "-", " M," " M," " M," " M," " S,"  
" S," " S," " S," " S," " S," " M," " M," " M," " S," " S," " M," " M,"  
" M," " M," " M," " M," " M," " S," " S," " S," " S," " M," " M," " S,"  
" M," " M," " M," " S," " M," " M,"  
" M," " S," " M," " M," " S," " S," " S," " S," " M," " M," " M,"  
" M," " S," " M," " M," " M," " M,"  
" M," " M," " M," " M," " M," " M," " M," " M," " M," " M," " M," " M,"  
" S," "-", " S," " S," " M," " M," " M," " S," " M," " S," " S," " S," " M,"  
" M," " S," " S," " S," " S," " S," " M," "-", " M," " S," " S," " S," "-",  
" S," " M," " M," " S," " S," " S," " M," " M," " M," " S," " S," " M,"  
" M," " S," " S," " S," " M," " M," " S," " M," " M," " M," " S," " S,"  
" S," " S," " S," "-", " M," " M," " M," " S," " S," " S," " S," "-", " S,"  
" S," " S," " S," " S," " S," " S," " S," " S," " S," " S," " M," " M," " M,"  
" M," " S," " S," " S," " M," " M," " M," " M," " S," " S," " S," " S," " S,"  
" S," " M," " M," " M," " M," " S," " S," " M," " M," " M"

5.144672,3.141395,11.2832798269957,3.351667,4.023268,8.28996588969503,3.525236086,5  
.458751,7.624866689,11.734712,4.929070651,6.754189,5.490354,7.97173,4.610065424,5.85  
3601546,6.000970368,2.756954327,3.445543538,2.396951675,4.238703419,3.175212268,6.1  
35811109,3.586498808,0.843832283,0.926486584,5.754093016,4.296369272,3.467839905,2.  
818429116,7.371324061,"S," " M," " S," " S," " M," " M," " S," " S," " S,"  
" S," " S," " S," " S," " S," " S," " S," " S," " S," "-", " S," " S," "-", " M,"  
" S," " M," "-", " S," " M,"  
" M," " M," " M," " M," " M," " M," " M," " M," " M," " M," " M," " M,"  
" M," " M," " M," " M," " M," " M," " S," " S," " S," " S," " M," " S,"  
" M," " M," " S," " S," " S," " S," " S," " S," " M," " M," " M," " M," " M,"  
" M," " S," " S," " S," " S," " M," " S," " M," " M," " M," " M," " S,"  
" M," " M," " M," " M," " S," " S," " S," " M," " S," " S," " M," " S,"  
" S," " S," " S," " S," " S," " S," " S," " S," " M," " M," " S," " S," " S,"  
" M," " M," " M," " M," " S," " M," " M," " M," " M," " S," " M," " M,"  
" M," " M," " M," " M," " M," " M," "-", " M," " M," " M," " S," " M," " M,"  
" M," " M," " M," " M," " M," " M," " M," " M," " M," " M," " M," " M,"  
" M," " S," " S," " S," " M," " M," " M," " M," " S," "-", " S," " S," " M,"  
" S," " S," " M," " M," " M," " M," " M," " S," " M," " S," " M," " M,"  
" M," " S," " M," " M," " M," " M," " M,"  
" M," " M," "-", "-", " S," " S," " S," "-", " S," " M," " S," " M," " M,"  
" M," " M," " S," " S," " M"

7.5421,5.713444,3.50745879147471,7.336792,5.526624,6.83496251022,4.938319743,7.8016  
17,20,20,5.393031012,8.067059,7.929073,13.253965,6.889471255,6.218891085,7.116637758  
,5.31868265,5.060966141,2.495225938,10.91643366,6.425924871,7.962135366,4.978363159  
,0.478373711,0.957545228,6.983825691,7.166509322,8.502375214,4.506982807,8.56357139

2,"M," " M," " S," " S," " M,"  
" M," " S," " S," " S," " S," "-", " M," " M," "-", " M," " S," " S," " S,"  
" S," " S," " S," " S," " S," " S," " M," " M," " S," " S," " S," " S," " S,"  
" S," " S," " S," " S," " S," " S," " S," " S," " S," " M," " M," " M," " M,"  
" S," " S," " M," " M," " S," " S," " S," " M," " S," " S," " M," " M," " S,"  
" S," " S," " M,"  
" M," " M," " S," " M," " M," " M," " M," " M," " M," " S," " S," " S,"  
" M," " S," " S," " S," " S," " S," " S," " M," " M," " M," " M," " M,"  
" M," " M," " S," " S," " S," " S," " M," "-", " M," " M," " M," " M,"  
" M," " S," " S," " S," " M," " M," " M," "-", " S," " M," " M," " M," "-",  
" M," " S,"  
" S," " S," " S," " S," " S," " S," " S," " S," " S," " S," " M," " M," "-",  
" S," " M," "-", " M," " M," " M," " M," " S," " S," " S," "-", " M," " M,"  
" S," " M," " M," " M," " M,"  
" M," " S," " S," " S," " S," " S," " M," " M," "-", "-", "-", "-", " S,"  
" S," " M," " M," " M," " S," " M," " M," " M," " S"

8.568548,5.958773,6.6897245376839,14.531988,5.800197,7.66637586761811,5.196686663,1  
0.12291,7.454528383,20,4.281305332,9.958243,3.42925,6.712656,5.569146252,6.376605307  
,5.667562505,8.54079906,5.109102513,4.922072249,12.37417747,5.245964964,20,5.305971  
597,0.353598645,0.940945984,4.979561073,5.814384827,6.05298103,5.719590761,10.52110

669,"M," " M," " M," " M," " M," " M," " S," " S," " S," " S," " S," " S,"  
" M," " M," " M," " S," " S," "-", " M," " M," " M," " S," " M," " M,"  
" M," " S," " M,"  
" S," " M," " M," " S,"  
" S," " S," " M," " S," " M,"  
" S," " S," " M," " M," " S," " S," " M," " M," " M," " M," " M," " M,"  
" M," " M," " M," " M," " M," " S," " M," " M," " M," " S," " S," " M,"  
" M," " M," " M," " M," " S," " M,"  
" M," "-", " M," " M," "-", " S," " S," " S," " S," " M," " M," " M," " M,"  
" M," " M," " M," " S," " M," " M," " M," " M," " M," " M," " S," " S,"  
" S," " S," " S," " S," "-", " S," " S," " M," " S," " S," " S," " S," "-",  
" S," " S," " S," " M," " M," " M," " M," " M," " S," " S," " M," " S,"

“ S,” “ M,” “ M,” “ S,” “ S,” “ S,” “ S,”  
“ S,” “ S,” “ S,” “ S,” “ M,” “ S,” “ S,” “ S,” “ S,” “ S,” “ M,” “ S”

8.532298,4.516627,3.20094792677613,4.69677,4.555744,4.89461076183099,3.463956581,9.  
738754,6.495428732,5.842297,3.780403161,8.880026,20,7.761645,6.363514299,6.45797071  
2,9.497759875,3.238004509,2.880813379,2.242489803,5.373557283,5.139991118,3.6457566  
66,3.036049614,0.125954281,0.397358491,4.435955918,4.583544676,5.300827052,2.809527

27,8.822058392,"M," “ S,” “ M,” “ M,” “ S,” “ M,” “ S,” “ S,” “ S,” “ S,” “ S,”  
“ S,” “ S,” “ S,” “ M,” “ M,” “ M,” “ M,” “ -,” “ M,” “ S,” “ -,” “ S,” “ S,”  
“ S,” “ S,” “ S,” “ S,” “ S,” “ S,” “ S,” “ S,” “ S,” “ S,” “ S,” “ S,” “ S,”  
“ S,” “ M,” “ M,” “ M,” “ M,” “ M,” “ M,” “ S,” “ M,” “ M,” “ M,” “ M,” “ M,”  
“ S,” “ S,” “ M,” “ M,” “ M,” “ S,” “ S,” “ S,” “ M,” “ S,” “ S,” “ S,” “ S,”  
“ S,” “ M,” “ S,” “ S,” “ S,” “ S,” “ M,” “ M,” “ M,” “ M,” “ S,” “ S,” “ S,”  
“ S,” “ S,” “ S,” “ S,” “ M,” “ M,” “ M,” “ M,” “ M,” “ M,” “ S,” “ S,”  
“ M,” “ M,” “ M,” “ M,” “ S,”  
“ M,” “ S,” “ M,” “ S,” “ S,” “ S,” “ S,”  
“ S,” “ S,” “ S,” “ S,” “ S,” “ S,” “ M,” “ M,” “ S,” “ S,” “ S,” “ S,” “ -,”  
“ M,” “ M,” “ M,” “ S,” “ M,”  
“ M,” “ S,” “ S,” “ S,” “ S,” “ S,” “ M,” “ M,” “ M,” “ M,” “ M,” “ -,” “ S,”  
“ S,” “ -,” “ S,” “ -,” “ -,” “ S,” “ S,” “ S,” “ S,” “ -,” “ S,” “ S,” “ S,”  
“ S,” “ S,” “ S,” “ M,”  
“ S,” “ S,” “ -,” “ M,” “ S,” “ S,” “ M,” “ M,” “ M,” “ M,” “ S,” “ S,” “ S,”  
“ S,” “ S,” “ S,” “ S,” “ S,” “ S,” “ S,” “ S,” “ S”

14.038299,8.142446,8.51956295653227,20,6.995894,8.35354752002983,6.221376882,9.7891  
35,14.70575612,20,5.293995245,7.481388,10.017362,11.163186,9.028062529,4.920881482,9  
.736297913,4.883228269,5.181257549,3.957821387,9.129573439,8.717716324,20,4.7712330  
76,0.891945326,0.977148065,9.327955378,7.463302687,9.264123919,3.56394679,9.8499076

83,"M," “ -,” “ M,” “ M,” “ M,” “ -,” “ M,” “ M,” “ M,” “ -,” “ M,” “ -,” “ -,”  
“ M,” “ S,” “ -,” “ S,” “ -,” “ M,” “ M,” “ M,” “ M,” “ -,” “ M,” “ -,” “ M,”  
“ M,” “ M,” “ M,” “ M,” “ M,” “ -,” “ M,” “ S,” “ S,” “ S,” “ S,” “ M,”  
“ M,” “ -,” “ M,” “ M,” “ M,” “ S,” “ S,” “ -,” “ M,” “ S,” “ M,” “ -,” “ -,”  
“ S,” “ S,” “ -,” “ M,” “ S,” “ S,” “ M,” “ S,” “ S,” “ M,” “ M,” “ M,” “ S,”  
“ M,” “ M,” “ S,” “ S,” “ S,” “ -,” “ -,” “ M,” “ M,” “ M,” “ M,” “ S,” “ M,”  
“ -,” “ -,” “ M,” “ M,” “ M,” “ -,” “ S,” “ S,” “ S,” “ M,” “ M,” “ S,” “ S,”  
“ S,” “ S,” “ -,” “ -,” “ S,” “ -,” “ M,” “ -,” “ S,” “ M,” “ -,” “ M,” “ -,”  
“ M,” “ S,” “ M,” “ S,” “ S,” “ -,” “ -,” “ M,” “ M,” “ M,” “ M,” “ M,” “ S,”  
“ M,” “ S,” “ S,” “ M,” “ -,” “ M,” “ M,” “ M,” “ -,” “ S,” “ -,” “ M,” “ -,”  
“ -,” “ M,” “ M,” “ M,” “ M,” “ M,” “ -,” “ M,” “ M,” “ M,” “ M,” “ M,”  
“ M,” “ -,” “ M,” “ -,” “ -,” “ M,” “ -,” “ -,” “ S,” “ S,” “ S,” “ -,” “ M,”

“ M,” “ M,” “ -,” “ S,” “ S,” “ M,” “ -,” “ -,” “ -,” “ M,” “ S,” “ S,” “ S,”  
“ S,” “ M,” “ S,” “ S,”  
“ S,” “ S,” “ S,” “ -,” “ S,” “ -,” “ -,” “ S,” “ S,” “ S,” “ S,” “ S,” “ S,”  
“ S,” “ S,” “ S,” “ S,” “ S,” “ S”

8.697631,5.131775,7.33543655792827,6.948876,5.378703,9.14008932787123,4.657013695,8  
.361125,8.109601269,8.098373,4.108736037,7.497858,20,8.938614,5.584210586,7.06188745  
9,6.421528015,4.897659203,4.914461803,5.254625925,8.521843404,5.738958827,5.5107266  
47,4.724317989,0.105917452,0.452398256,5.788931761,4.883728504,5.215803922,3.330683

426,11.75278009,"S," “ M,” “ S,” “ -,” “ S,” “ S,” “ M,” “ M,” “ S,” “ -,”  
“ M,” “ M,” “ -,” “ M,” “ M,” “ M,” “ S,” “ -,” “ S,” “ S,” “ S,” “ S,” “ M,”  
“ M,” “ M,” “ M,” “ M,” “ M,” “ M,” “ M,” “ M,” “ M,” “ -,” “ M,” “ M,” “ M,”  
“ M,” “ S,” “ S,” “ S,” “ S,” “ S,” “ S,” “ M,” “ S,” “ S,” “ S,” “ -,” “ -,” “ S,”  
“ S,” “ S,” “ S,” “ S,” “ S,” “ S,” “ S,” “ M,” “ M,” “ S,” “ S,” “ M,” “ M,”  
“-,” “ -,” “ S,” “ S,” “ S,” “ M,” “ M,” “ M,” “ -,” “ M,” “ -,” “ -,” “ -,”  
“ M,” “ S,” “ M,” “ M,” “ M,” “ M,” “ S,” “ S,” “ S,” “ S,” “ S,” “ M,”  
“ S,” “ M,” “ M,” “ M,” “ M,” “ M,” “ -,” “ M,” “ M,” “ M,” “ M,” “ M,”  
“ M,” “ M,” “ M,” “ M,” “ -,” “ M,” “ M,” “ M,” “ M,” “ -,” “ M,” “ -,” “ M,”  
“ S,” “ S,” “ -,” “ -,” “ S,” “ M,” “ M,”  
“-,” “ M,” “ M,” “ M,” “ S,” “ S,” “ S,” “ M,” “ M,” “ M,” “ M,” “ M,”  
“ S,” “ S,” “ S,” “ M,” “ M,” “ S,” “ M,” “ M,” “ M,” “ M,” “ S,” “ S,” “ -,”  
“ M,” “ M,” “ M,” “ -,” “ S,” “ S,” “ M,” “ -,” “ M,” “ -,” “ S,” “ -,” “ -,” “ -”  
,” “ M,” “ S,” “ M,” “ S,” “ S,” “ S,” “ S,”  
“ M,” “ M,” “ S,” “ S,” “ M,” “ S,” “ S,” “ S,” “ M,” “ M,” “ M,” “ M,” “ -,”  
“ M,” “ M,” “ M,” “ M,” “ M,” “ S,” “ S,” “ S,” “ S,” “ S”

8.824786,5.300275,8.79447539461467,7.634196,4.648699,7.42267968037723,4.257689559,9  
.242147,10.89853051,20,5.1807931,9.137003,8.083985,6.747692,6.277455193,6.202982248,  
10.11914004,2.376003072,4.900315529,4.012648434,8.93203448,5.903819248,20,4.1573167  
74,0.108010892,0.610370865,7.529565211,6.727362026,7.352514076,4.140397639,20,"M,”

“ M,” “ M,” “ M,” “ S,” “ M,” “ -,”  
“ M,” “ S,” “ S,” “ S,” “ -,” “ M,”  
“ M,” “ M,” “ M,” “ M,” “ M,” “ M,” “ S,” “ M,” “ M,” “ M,” “ M,” “ M,”  
“ M,” “ M,” “ M,” “ M,” “ S,” “ S,” “ M,” “ M,” “ S,” “ S,” “ S,” “ S,”  
“ S,” “ S,” “ S,” “ M,” “ M,” “ S,” “ M,” “ M,” “ S,” “ M,” “ M,” “ M,”  
“ S,” “ S,” “ S,” “ M,” “ S,” “ M,” “ M,”  
“ M,” “ M,” “ S,” “ S,” “ M,” “ S,”  
“ S,” “ S,” “ M,” “ M,” “ M,” “ S,” “ S,” “ S,” “ S,” “ M,” “ M,” “ S,” “ S,”  
“ S,” “ M,” “ M,” “ M,” “ S,” “ S,” “ S,” “ S,” “ M,” “ S,” “ S,” “ M,”  
“ M,” “ M,” “ M,” “ S,” “ S,” “ S,” “ S,” “ M,” “ M,” “ M,” “ S,” “ M,”

“ M,” “ -,” “ M,” “ S,” “ S,” “ S,”  
“ M,” “ S,” “ S,” “ S,” “ S,” “ M,” “ M,” “ -,” “ S,” “ -,” “ S,” “ S,” “ M,”  
“-,” “ M,” “ M,” “ M,” “ -,” “ M,” “ M,” “ M,” “ M,” “ M,” “ S,” “ M,” “ -,”  
“-,” “ -,” “ M,” “ M,” “ M,” “ M,” “ S,” “ S,” “ S,” “ S,” “ S,” “ -,” “ S,”  
“ M,” “ M,” “ M,” “ M,” “ M,” “ S,” “ S,” “ M,” “ S,” “ S,” “ -,” “ M,” “ -,”  
“-,” “ -,” “ M,” “ M,” “ M,” “ M,” “ S,” “ S,” “ -,” “ M,” “ S”

8.543149,5.344672,3.93603957235516,20,4.505193,11.0183170596402,4.472372438,5.46351  
2,8.366656051,20,7.590590512,9.588081,10.483169,9.945476,6.936065012,5.15361711,10.0  
3245075,6.487579655,5.227932056,6.341526786,11.0461945,5.754799961,20,5.550198456,0  
.76558475,1.175533737,6.946604596,4.263366336,6.934736423,7.795345593,7.212244215,"

S,” “ -,” “ S,” “ -,” “ S,” “ -,” “ S,” “ S,” “ S,” “ -,” “ M,” “ -,” “ -,” “ M,”  
“ M,” “ -,” “ S,” “ -,” “ S,” “ S,” “ S,” “ S,” “ -,” “ M,” “ -,” “ M,” “ M,”  
“ M,” “ M,” “ -,” “ M,” “ -,” “ -,” “ S,”  
“ S,” “ S,” “ S,” “ S,” “ S,” “ -,” “ S,” “ M,”  
“ M,” “ M,” “ M,” “ M,” “ S,” “ S,” “ S,” “ S,” “ M,” “ M,” “ -,” “ -,” “ -,”  
“ M,” “ M,” “ S,” “ -,” “ S,” “ -,” “ M,”  
“ S,” “ S,” “ S,” “ -,” “ S,” “ S,” “ -,” “ S,” “ S,” “ S,” “ -,” “ S,” “ S,”  
“ M,” “ M,” “ S,” “ -,” “ M,” “ -,” “ M,” “ S,” “ M,” “ M,” “ -,” “ M,” “ -,”  
“ S,” “ M,” “ -,” “ M,” “ -,” “ M,” “ M,” “ M,” “ M,” “ M,” “ -,” “ M,” “ -,”  
“ M,” “ S,” “ S,” “ S,” “ S,” “ S,” “ -,” “ -,” “ M,” “ M,” “ -,” “ M,” “ M,”  
“-,” “ M,” “ S,” “ M,” “ -,” “ -,” “ M,” “ -,” “ M,” “ M,” “ M,” “ M,” “ M,”  
“-,” “ M,” “ M,” “ -,” “ M,” “ S,” “ S,” “ M,” “ -,” “ M,” “ M,” “ M,” “ -,”  
“ M,” “ M,” “ -,” “ -,” “ -,” “ S,” “ S,” “ M,” “ M,” “ S,” “ M,” “ M,” “ M,”  
“ M,” “ S,” “ M,” “ S,”  
“ S,” “ S,” “ S,” “ M,” “ M,” “ -,” “ S,” “ S,” “ S,” “ S,” “ S,” “ M,” “ M,”  
“ M,” “ M,” “ M”

4.78936,3.527018,3.14025508640166,3.021309,3.574628,6.28467970143986,2.555272517,5.  
841836,8.871288244,14.203467,3.393297517,3.848672,4.885333,7.506406,4.75566191,5.054  
205154,10.89573436,2.421399876,3.716638205,2.593903885,5.112241339,3.63547285,4.418  
733627,3.281262803,0.104294984,0.630619961,5.204223085,4.874590134,4.041791774,2.77

2672803,9.169946455,"M,” “ S,” “ S,” “ S,” “ M,” “ M,” “ M,” “ S,” “ S,” “ S,”  
“ S,” “ S,” “ S,” “ S,” “ S,” “ S,” “ S,” “ -,” “ M,” “ M,” “ M,” “ M,” “ M,”  
“ S,” “ M,” “ M,” “ M,” “ S,” “ S,” “ S,” “ M,” “ M,” “ S,” “ M,” “ M,”  
“ M,” “ M,” “ S,” “ S,” “ M,” “ S,” “ S,” “ M,” “ M,” “ M,” “ M,” “ S,”  
“ S,” “ S,” “ M,” “ M,” “ S,” “ S,” “ S,” “ S,” “ S,” “ S,” “ M,” “ M,” “ M,”  
“ M,” “ M,” “ M,” “ S,” “ M,” “ S,”  
“ S,” “ S,” “ S,” “ M,” “ M,” “ S,” “ S,” “ M,” “ M,” “ S,” “ M,” “ M,”  
“ S,” “ S,” “ S,” “ M,” “ M,” “ S,” “ S,” “ S,” “ S,” “ S,” “ S,” “ M,” “ M,”

“ M,” “ M,” “ M,” “ S,” “ S,” “ S,” “ S,” “ -,” “ S,” “ M,” “ S,” “ M,” “ S,”  
“ S,” “ S,” “ S,” “ S,” “ S,” “ S,” “ S,” “ S,” “ S,” “ S,” “ -,” “ M,” “ M,”  
“ M,” “ -,” “ S,” “ S,” “ S,” “ M,”  
“ S,” “ S,” “ M,” “ M,” “ M,” “ M,” “ M,” “ S,” “ S,” “ S,” “ S,” “ M,”  
“ S,” “ S,” “ S,” “ S,” “ S,” “ -,” “ S,” “ M,” “ M,” “ M,” “ S,” “ S,” “ M,”  
“-,” “ M,” “ M,” “ S,” “ M,” “ M,” “ M,” “ M,” “ S,” “ M,” “ M,” “ M,”  
“ S,” “ M,” “ M,” “ S,” “ S,” “ S,” “ S,” “ M,” “ M,” “ M,” “ -,” “ -,” “ M,”  
“ M,” “ -,” “ -,” “ S,” “ S,” “ S,” “ S,” “ S,” “ S,” “ M,” “ M,” “ M,” “ M”

3.845635,6.247561,3.07287950852159,20,5.772838,3.14986979166666,5.295900935,3.01635  
5,20,3.516503,5.723999864,3.665307,2.754527,5.2159,6.480305879,5.577341311,8.5602032  
52,6.769657607,6.104024148,6.198241385,3.278613572,2.994402248,20,4.192381317,0.194

328713,0.301276596,7.485810075,6.167075472,7.23981437,8.03775245,20,"M," " M,"  
“ M,” “ M,” “ M,” “ S,” “ S,” “ S,” “ S,” “ -,” “ S,” “ S,” “ M,” “ M,” “ M,”  
“ M,” “ -,” “ -,” “ S,” “ S,” “ -,” “ M,” “ M,” “ S,” “ S,” “ M,” “ M,” “ S,”  
“ S,” “ S,” “ S,” “ -,” “ S,” “ M,”  
“ M,” “ M,” “ M,” “ M,” “ M,” “ M,” “ M,” “ M,” “ S,” “ M,” “ S,” “ M,”  
“ M,” “ M,” “ M,” “ M,” “ M,” “ M,” “ M,” “ M,” “ -,” “ S,” “ S,” “ S,” “ S,”  
“ M,”  
“ M,” “ M,” “ M,” “ M,” “ S,” “ S,” “ S,” “ S,” “ S,” “ M,” “ M,” “ M,”  
“ M,” “ M,” “ M,” “ S,” “ S,” “ S,” “ S,” “ S,” “ M,” “ M,” “ M,” “ M,”  
“ M,” “ M,” “ M,” “ S,” “ S,” “ M,” “ S,”  
“ S,” “ S,” “ M,” “ M,” “ M,” “ -,” “ M,” “ M,” “ M,” “ M,” “ -,” “ S,” “ S,”  
“ M,” “ M,” “ M,” “ M,” “ S,” “ S,” “ S,” “ S,” “ M,” “ S,” “ M,” “ S,”  
“ S,” “ S,” “ S,” “ M,” “ M,” “ M,” “ M,” “ M,” “ S,” “ M,” “ M,” “ S,”  
“ M,” “ -,” “ M,” “ -,” “ M,” “ M,”  
“ S,” “ M,” “ M,” “ S,”  
“ M,” “ M,” “ M,” “ S,” “ S,” “ S,” “ S,” “ -,” “ -,” “ S,” “ -,” “ -,” “ S,”  
“ S,” “ S,” “ S,” “ S,” “ S,” “ S,” “ M,” “ M,” “ M”

9.642633,6.141446,7.54545368079043,5.600149,5.931214,8.87192525527032,5.262357949,9  
.818713,14.43388751,20,5.950018194,10.042132,10.642127,7.303965,6.530509445,6.646098  
256,11.31714023,4.312670965,4.975119797,3.975982231,8.384214958,6.012606209,9.11081  
3343,4.904519594,0.101376902,0.675483792,8.656668892,7.001849448,6.220568526,4.4100

13154,10.4092233,"S," “ S,” “ M,” “ S,”  
“ S,” “ S,” “ -,” “ S,” “ S,” “ M,” “ M,” “ -,” “ M,” “ S,” “ -,” “ S,” “ S,”  
“ S,” “ M,” “ S,” “ S,” “ M,” “ M,” “ M,” “ S,” “ M,” “ S,” “ S,” “ S,” “ S,”  
“ S,” “ S,” “ S,” “ M,” “ M,” “ M,” “ S,” “ S,” “ S,” “ M,” “ S,” “ S,” “ S,”  
“ S,” “ S,” “ S,” “ S,” “ M,” “ M,” “ S,” “ M,” “ M,” “ S,” “ S,” “ S,” “ M,”  
“ S,” “ S,” “ S,” “ S,” “ S,” “ M,” “ M,” “ M,” “ M,” “ S,” “ M,” “ M,”

“ M,” “ M,” “ S,” “ S,” “ M,” “ M,” “ M,” “ M,” “ M,” “ S,” “ S,” “ S,”  
“ S,” “ S,” “ S,” “ S,” “ S,” “ M,” “ M,” “ S,” “ M,” “ M,” “ M,” “ M,”  
“ S,” “ S,” “ M,” “ S,” “ S,” “ S,” “ S,” “ M,” “ M,” “ M,” “ M,” “ M,”  
“ S,” “ M,” “ M,” “ S,” “ S,” “ S,” “ M,” “ M,” “ S,” “ S,” “ M,” “ S,”  
“ M,” “ S,” “ -,” “ M,” “ S,” “ S,”  
“ S,” “ S,” “ M,” “ M,” “ S,” “ S,” “ S,” “ M,” “ M,” “ S,” “ -,” “ S,” “ S,”  
“ M,” “ S,” “ S,” “ M,” “ M,” “ -,” “ M,” “ M,” “ M,” “ S,” “ S,” “ S,” “ S,”  
“ -,” “ M,” “ M,” “ S,” “ M,” “ M,” “ S,”  
“ M,” “ S,” “ -,” “ M,” “ M,” “ -  
,” “ -,” “ -,” “ S,” “ S,” “ S,” “ M,” “ M,” “ M,” “ M,” “ M,” “ S,” “ S”

4.542116,3.314151,9.13989029084968,3.599283,3.525702,4.60194053342311,3.58374508,6.

315485,6.096196761,13.322654,3.317266368,4.792936,4.790866,8.556259,4.909793831,4.05

5654962,6.791941474,2.784408176,3.081365573,2.616953812,3.066870172,3.782308245,5.3

65875792,3.320440535,0.913108906,0.887964569,3.531321065,3.595585846,3.172236439,2.

896872252,5.561971476,"M," “ M,” “ M,”

“ M,” “ M,” “ M,” “ S,” “ S,” “ S,” “ M,” “ M,” “ -,” “ S,” “ S,” “ S,” “ S,”

“ M,” “ S,” “ S,” “ S,” “ S,” “ S,” “ S,” “ M,” “ M,” “ S,” “ S,” “ S,” “ S,”

“ M,” “ M,” “ M,” “ M,” “ M,” “ S,” “ S,” “ M,” “ M,” “ M,” “ M,” “ M,”

“ S,” “ M,” “ M,” “ M,” “ M,” “ M,” “ S,” “ S,” “ S,” “ S,” “ S,” “ S,”

“ S,” “ M,” “ M,” “ S,” “ M,” “ M,” “ S,” “ S,” “ S,” “ S,” “ S,” “ S,” “ -,”

“ S,” “ S,” “ M,” “ S,” “ S,”

“ S,” “ S,” “ S,” “ M,” “ S,” “ S,” “ S,” “ S,” “ S,” “ M,” “ M,” “ M,” “ M,”

“ M,” “ M,” “ M,” “ S,” “ S,” “ S,” “ S,” “ M,” “ M,” “ S,” “ S,” “ S,” “ S,”

“ S,” “ S,” “ M,” “ S,” “ S,”

“ -,” “ M,” “ M,” “ S,” “ S,” “ S,” “ S,” “ M,” “ S,” “ S,” “ M,” “ M,” “ M,”

“ M,” “ M,” “ S,” “ M,” “ M,” “ M,” “ S,” “ M,” “ M,” “ M,” “ M,” “ M,”

“ S,” “ S,” “ M,” “ -,” “ M,” “ M,” “ M,” “ M,” “ M,” “ S,” “ S,” “ -,” “ S,”

“ S,” “ M,” “ M,” “ M,” “ M,” “ M,” “ S,” “ S,” “ S,” “ S,” “ -,” “ S,” “ S,”

“ M,” “ -,” “ -,” “ S,” “ -,” “ -,”

“ -,” “ S,” “ S,” “ M,” “ M,” “ M,” “ M,” “ -,” “ M,” “ M”

3.970166,2.831106,3.2345279459794,2.942587,3.153608,6.53022053413053,2.986662821,5.

217236,6.74458207,13.937595,3.46518091,3.611576,4.164765,7.652454,3.887916577,4.4011

29135,6.411128828,2.511330306,2.989773834,1.894817238,3.69302936,2.627887098,6.7182

34844,2.8477048,0.907758294,0.900953362,5.211887161,3.817944118,2.96903132,2.620289

353,5.24729457,"M," “ M,” “ M,” “ M,” “ M,” “ M,” “ S,” “ S,” “ S,” “ S,”

“ S,” “ S,” “ S,” “ M,” “ S,” “ S,” “ S,” “ -,” “ M,” “ M,” “ -,” “ S,” “ S,”

“ S,” “ M,” “ M,” “ S,” “ S,” “ S,” “ S,” “ S,” “ M,” “ M,” “ M,” “ M,”

“ M,” “ M,” “ M,” “ M,” “ M,” “ M,” “ M,” “ M,” “ M,” “ M,” “ M,” “ M,”



“ M,” “ M,” “ M,” “ M,” “ M,” “ M,” “ M,” “ M,” “ S,” “ S,” “ M,” “ M,”  
“ M,” “ M,” “ M,” “ S,” “ S,” “ S,” “ S,” “ M,” “ S,” “ S,” “ S,” “ S,” “ M,”  
“ M,” “ S,” “ S,” “ S,” “ S,” “ S,” “ S,” “ M,” “ M,” “ S,” “ S,” “ M,” “ M,”  
“ M,” “ S,” “ S,” “ M,” “ -,” “ M,” “ M,” “ S,” “ M,” “ M,” “ M,” “ S,” “ S,”  
“ S,” “ M,” “ S,” “ S,” “ S,” “ S,” “ S,” “ M,” “ M,” “ -,” “ M,” “ M,” “ M,” “ S,”  
“ S,” “ S,” “ -,” “ S,” “ M,” “ M,” “ S,” “ S,” “ S,” “ S,” “ -,” “ M,” “ M,”  
“ -,” “ M,”  
“ S,” “ S,” “ S,” “ S,” “ S,” “ M,”  
“ M,” “ M,” “ M,” “ S,” “ -,” “ M,” “ M,” “ M,” “ S,” “ S,” “ M,” “ M,” “ -,”  
“ S,” “ S,” “ S,” “ M,” “ S,”  
“ M,” “ S,” “ S,” “ S,” “ S,” “ S,”  
“ M,” “ S,” “ M,”  
“ M”

7.283851,4.425172,5.93489160184255,20,4.218047,8.35530317068712,3.860539055,7.28487  
5,10.87204314,20,4.831011841,5.90041,7.635453,7.549422,5.432362358,4.954757637,9.014  
528748,5.296954223,3.830849286,3.011450036,7.549065205,5.343286607,20,3.392375766,0  
.130470053,0.763993728,5.264658627,5.261614043,7.029473837,3.613893323,10.81855131,

“M,” “ M,” “ M,” “ -,” “ M,” “ S,” “ M,” “ M,” “ M,” “ -,” “ M,” “ -,” “ -,”  
“ M,” “ -,” “ -,” “ M,” “ -,” “ S,” “ M,” “ M,” “ M,” “ S,” “ S,” “ -,” “ S,”  
“ S,” “ M,” “ M,” “ M,” “ M,” “ -,” “ -,” “ S,” “ S,” “ M,” “ M,” “ M,” “ M,”  
“ -,” “ M,” “ S,” “ S,” “ S,” “ S,” “ S,” “ M,” “ M,” “ M,” “ S,” “ -,” “ S,” “ S,”  
“ S,” “ -,” “ S,” “ -,”  
“ S,” “ S,” “ S,” “ S,” “ -,” “ S,” “ -,” “ -,” “ M,” “ M,” “ -,” “ M,” “ -,”  
“ M,” “ M,” “ M,” “ -,” “ M,” “ M,” “ -,” “ M,” “ S,” “ S,” “ M,” “ M,” “ S,”  
“ M,” “ -,” “ M,” “ S,” “ M,” “ M,” “ M,” “ M,” “ M,” “ -,” “ S,” “ -,” “ M,”  
“ -,” “ S,” “ S,” “ M,” “ M,” “ -,” “ S,” “ S,” “ S,” “ S,” “ S,” “ -,” “ M,”  
“ M,” “ M,” “ -,” “ -,” “ -,” “ M,” “ M,” “ -,” “ M,” “ M,” “ -,” “ -,” “ M,”  
“ S,” “ S,” “ S,” “ S,” “ -,” “ -,” “ -,” “ S,” “ -,” “ -,” “ M,” “ -,” “ S,”  
“ M,” “ -,” “ M,” “ -,” “ -,” “ S,” “ -,” “ M,” “ M,” “ -,” “ -,” “ M,” “ M,” “ -  
,” “ M,” “ M,” “ M,” “ -,” “ -,” “ M,” “ -,” “ S,” “ S,” “ -,” “ S,” “ S,” “ S,”  
“ M,” “ M,” “ -,” “ M,” “ M,” “ M,” “ M,” “ M,” “ M,” “ -,” “ M,” “ M,”  
“ S,” “ S,” “ M,” “ -,” “ -,” “ -,” “ -,” “ S,” “ S,” “ S,” “ S,” “ S,” “ M,” “ -  
,” “ S,” “ S”

8.652766,6.696144,3.42817975503624,11.591158,6.829411,7.13893792826626,5.20400606,8  
.474961,13.07441338,20,5.676236054,8.039934,8.911726,20,8.013704427,5.476652127,9.33  
3034962,4.377572485,5.30898044,3.232217703,12.50206013,6.218880527,20,4.734319559,0  
.098667654,0.695959685,8.223967893,6.515522139,7.820859601,4.980360363,11.74644543,  
“M,” “ M,” “ M,” “ M,” “ M,” “ M,” “ S,” “ S,” “ S,” “ M,” “ M,” “ M,”

“ M,” “ S,” “ M,” “ M,” “ M,” “ -,” “ S,” “ S,” “ S,” “ M,” “ S,” “ M,” “ M,”  
“ S,” “ S,” “ S,” “ S,” “ S,” “ S,” “ -,” “ S,” “ S,” “ S,” “ S,” “ -,” “ M,”  
“ M,” “ M,” “ M,” “ M,” “ M,” “ M,” “ S,” “ S,” “ S,” “ M,” “ S,” “ S,”  
“ S,” “ S,” “ S,” “ M,” “ M,” “ M,” “ S,” “ M,” “ M,” “ M,” “ M,” “ S,”  
“ M,” “ S,” “ M,” “ M,” “ M,” “ S,” “ S,” “ S,” “ S,” “ M,” “ M,” “ M,”  
“ S,” “ S,” “ S,” “ M,” “ S,” “ M,” “ M,” “ M,” “ S,” “ S,” “ S,” “ S,” “ S,”  
“ S,” “ S,” “ S,” “ S,” “ -,” “ S,” “ S,” “ M,” “ S,” “ S,” “ M,” “ M,” “ S,”  
“ S,” “ S,” “ S,” “ S,” “ S,” “ S,” “ S,” “ S,” “ M,” “ M,” “ M,” “ M,” “ M,”  
“ M,” “ M,” “ M,” “ M,” “ S,” “ -,”  
“ M,” “ M,” “ -,” “ S,” “ S,” “ M,” “ S,” “ S,” “ S,” “ S,” “ M,” “ S,” “ S,”  
“ S,” “ M,” “ M,” “ S,” “ M,” “ M,”  
“ S,” “ -,” “ M,” “ -,” “ M,” “ M,”  
“ M,” “ S,” “ S,” “ S,” “ -,” “ S,” “ M,” “ M,” “ M,” “ M,” “ M,” “ M,”  
“ M,” “ M,” “ M,” “ M,” “ M,” “ S,” “ S,” “ M,” “ -,” “ -,” “ -,” “ -,”  
“ S,” “ M,” “ M,” “ M,” “ M,” “ S,” “ S,” “ S,” “ M,” “ M”

5.885373,4.411164,3.67753838348436,6.813276,4.507749,5.45645859991061,3.919398009,1  
0.393029,6.408690721,9.204959,4.343330327,6.158477,7.136544,12.372893,5.874667525,5.  
14348217,9.574519568,3.003526818,3.837738041,2.374291944,6.820931773,4.445042702,5.  
102312731,3.79856793,0.583559214,0.658793111,4.153203802,5.114689793,4.696634407,2.  
989009787,12.03804848,"M," “ M,” “ M,” “ M,” “ M,” “ M,” “ S,” “ S,” “ S,”  
“ M,” “ S,” “ -,” “ M,” “ M,” “ -,” “ M,”  
“ S,” “ S,” “ M,” “ S,” “ S,” “ M,” “ M,” “ M,” “ S,” “ S,” “ S,” “ S,” “ M,”  
“ M,” “ M,” “ M,” “ M,” “ M,” “ M,” “ M,” “ M,” “ M,” “ M,” “ M,” “ M,”  
“ S,” “ S,” “ S,” “ S,” “ S,” “ M,” “ S,” “ S,” “ M,” “ S,” “ M,” “ M,” “ M,”  
“ S,” “ S,” “ M,” “ S,” “ S,” “ M,” “ S,” “ S,” “ S,” “ S,” “ S,” “ S,” “ M,”  
“ M,” “ S,” “ M,” “ M,” “ M,” “ S,” “ M,” “ M,” “ M,” “ S,” “ S,” “ M,”  
“ S,” “ S,” “ S,” “ M,” “ M,” “ M,” “ S,” “ S,” “ S,” “ M,” “ M,” “ M,”  
“ M,” “ S,” “ S,” “ S,” “ M,” “ -,” “ M,”  
“ M,” “ M,” “ S,” “ M,” “ S,” “ M,” “ -  
,” “ M,” “ M,” “ -,” “ S,” “ M,” “ M,” “ -,” “ S,” “ S,” “ -,” “ M,” “ M,”  
“ M,” “ M,” “ S,” “ M,” “ M,” “ M,” “ M,” “ M,” “ S,” “ S,” “ M,” “ M,”  
“ M,” “ M,” “ S,” “ S,” “ S,” “ M,” “ -,” “ M,” “ M,” “ M,” “ M,” “ S,” “ S,”  
“ M,” “ -,” “ -,” “ S,” “ M,” “ S,” “ S,” “ S,” “ S,” “ S,” “ S,” “ M,” “ M,”  
“ S,” “ S,” “ M,” “ -,” “ -,”  
“ -,” “ -,” “ -,” “ S,” “ S,” “ M,” “ S,” “ S,” “ S,” “ S,” “ S,” “ M,” “ M,” “ M”  
12.592226,5.604932,3.37836492158686,10.035832,5.492471,6.43005247842897,6.86991224  
9,6.698834,10.34823706,7.660611,4.924693351,8.035344,8.529561,5.11975,6.41528944,0.96  
1756034,1.26531427,4.842746921,7.735540187,4.554152313,15.18894534,6.542910133,20,7

.975203662,1.029819018,1.03167922,6.685955915,5.176256402,4.631332975,3.932323327,9

.499261533,"S," " S," " S," " S," " M," " S," " S," " S," " S," " S," " S,"  
" S," " S," " S," " S," " S," " M," " -," " M," " M," " M," " S," " M," " M,"  
" M," " M," " M," " M," " S," " S," " S," " -," " M," " M," " M," " M,"  
" M," " M," " M," " M," " M," " M," " M," " M," " M," " M," " S," " M,"  
" M," " M," " M," " S," " M,"  
" M," " S," " M," " M," " M," " S," " S," " M," " M," " S," " S," " M,"  
" M," " M," " M," " S,"  
" S," " S," " -," " M," " M," " M," " M," " M," " M," " -," " M," " M," " M,"  
" S," " -," " M," " -," " S," " S," " -," " M," " M," " M," " M," " S," " S,"  
" -," " S," " S," " S," " M," " M," " M," " M," " M," " M," " -," " M," " M,"  
" M," " -," " -," " S," " -," " S,"  
" S," " S," " -," " S," " -," " -," " M," " M," " M," " M," " -," " -," " S," " -  
," " M," " M," " M," " S," " S," " S," " S," " S," " -," " M," " M," " S,"  
" S," " M," " -," " M," " M," " M," " S," " S," " M," " -," " -," " S," " S,"  
" S," " M," " M"

5.133841,4.155425,3.80499308171897,3.464058,3.869964,5.76610335219459,3.993019453,9

.413469,6.594832927,7.123185,4.794253129,4.722716,5.602555,11.684578,5.304915911,4.4  
39743099,7.431096594,2.94106107,3.488553706,2.276985293,4.165654738,3.32870045,3.00  
1911828,3.567267871,0.895467099,1.005460369,4.788015918,4.579158088,4.174790029,3.0  
46061113,4.429211247,"M," " M," " S," " S," " M," " S," " S," " S," " S,"  
" S," " S," " S," " -," " S," " S," " S," " M," " -," " S," " M," " M," " S,"  
" S," " M," " S," " S," " S," " M," " M," " M," " S," " M," " M," " M,"  
" S," " S," " S," " S," " -," " M," " M," " M," " S," " S," " S," " M," " M,"  
" M," " M," " M," " M," " S," " S," " S," " M," " M," " S," " M," " M,"  
" M," " S," " M," " M," " S," " M," " M," " M," " M," " M," " S," " S,"  
" S," " S," " S," " S," " M,"  
" M," " M," " M," " M," " M," " M," " M," " M," " S," " S," " M," " M,"  
" S," " M," " M," " S," " S," " -," " M," " M," " S," " M," " M," " M,"  
" M," " M," " M," " M," " S," " S," " M," " M," " S," " M," " S," " S,"  
" M," " M," " S," " M," " -,"  
" M," " M," " M," " S," " S," " M," " M," " -," " S," " S," " M," " -," " S,"  
" S," " M," " -," " M," " S,"  
" S," " S," " S," " S," " S," " S," " M," " M," " M," " M," " M," " M,"  
" M," " -," " -," " -," " -," " S," " M," " M," " M," " M," " M," " M," " S,"  
" S," " M"

5.306101,4.548799,8.02657675212818,7.826785,3.721519,3.99976018468562,4.825537058,6  
.782294,7.243168153,20,4.001461506,5.47331,4.281673,20,5.044264621,4.692731863,8.753  
732534,2.899512934,3.327749024,2.51216563,7.084937337,3.939486441,10.95998058,3.354  
228093,0.389687199,0.689199689,4.23632506,4.080098941,3.956178332,3.133833835,20,"S,  
" " M," " S," " S," " S," " M,"  
" M," " M," " M," " M," " -," " M," " M," " S," " S," " M," " M," " M,"  
" S," " S," " S," " S," " M,"  
" M," " M," " M," " S,"  
" S," " S," " S," " S," " S," " S," " S," " S," " S," " S," " S," " M," " M,"  
" S," " M," " S," " S," " S," " S," " M," " M," " M," " M," " S," " S," " S,"  
" S," " S," " S," " M," " M," " S," " M,"  
" M," " M," " M," " M," " M," " M," " M," " S," " S," " S," " S," " M,"  
" S," " M," " S," " S,"  
" M," " M," " M," " S," " M," " -," " M," " S," " S," " S," " -," " M," " S,"  
" S," " S," " S," " M," " M," " S," " S," " S," " S," " M," " M," " M,"  
" M," " M," " M," " M," " M," " -," " S," " S," " M," " M," " -," " S," " S,"  
" -," " M," " S," " S," " S,"  
" S," " S," " S," " S," " M," " S," " S," " S," " S," " S," " M," " M," " M,"  
" M," " S," " S," " M," " M," " -," " M," " M," " -," " S," " S," " S," " S,"  
" S," " S," " S," " S," " M," " M," " M," " M"

5.49956,4.407889,7.32786106105713,2.896085,4.353005,10.7778453297168,3.899036749,7.  
0553,8.044564982,10.551599,3.648126748,4.495168,5.448898,5.027754,5.207682926,5.9731  
72394,6.445800309,3.065221041,3.774586301,2.72329802,4.733916464,3.962850244,7.4888  
84796,4.004277301,0.316043061,0.911583564,4.309549591,5.018433811,3.904006991,3.843  
987648,5.237492337,"S," " S," " S," " -," " M," " M," " M," " M," " M," " -,"  
" S," " S," " -," " -," " S," " S," " S," " -," " S," " S," " -," " S," " -,"  
" M," " M," " M," " M," " S," " S," " M," " M," " -," " M," " M," " M,"  
" M," " M," " S," " S," " -," " M," " M," " M," " M," " M," " S," " S,"  
" M," " -," " -," " M," " M," " M," " -," " S," " S," " S," " S," " S," " S,"  
" S," " M," " S," " S," " -," " S," " -,"  
" S," " M," " M," " M," " S," " S," " S," " S," " M," " S," " S," " M,"  
" M," " S," " M," " -," " S,"  
" S," " S," " S," " -," " M," " -," " M," " -," " S," " S," " S," " S," " -,"  
" S," " M," " M," " S," " S," " S," " S," " M," " M," " -," " -," " M," " M,"  
" M," " -," " M," " S," " M," " M," " S,"  
" -," " S," " -," " S," " S," " S," " S," " M," " -," " M," " S," " -," " S," " -  
," " M," " M," " -," " M," " M," " M," " -," " S," " S," " -," " -," " -," " M,"  
" M," " M," " M," " M," " M," " M," " -," " M," " M," " M," " M," " M,"

“ S,” “ -,” “ S,” “ S,” “ M,” “ M,” “ -,” “ M,” “ S,” “ -,” “ M,” “ M,” “ S,”  
“ S,” “ S,” “ M,” “ S,” “ -,” “ M,” “ S,” “ S,” “ -,” “ M”

4.798643,3.96813,12.8374671983096,3.46387,4.185661,9.11650427761712,4.192166007,9.8  
93708,7.876597912,7.662813,4.021752559,5.115982,5.292792,7.561668,5.055672812,5.0059  
48366,6.838956243,3.269299997,3.929760909,2.428638564,4.789189579,3.991025567,4.128  
012797,3.742111109,0.907214445,0.82245359,4.151947486,4.750992926,3.972449433,3.205

101052,6.030098241,"M," “ M,” “ S,” “ S,” “ S,” “ S,” “ S,” “ M,” “ M,” “ -,”  
“ M,” “ M,” “ -,” “ M,” “ M,” “ S,” “ M,” “ -,” “ M,” “ M,” “ S,” “ S,” “ S,”  
“ S,” “ -,” “ S,” “ S,” “ S,” “ M,”  
“ M,” “ S,” “ M,” “ S,” “ S,” “ S,” “ S,” “ M,”  
“ M,” “ M,” “ M,” “ S,” “ S,” “ S,” “ S,” “ S,” “ S,” “ M,” “ M,” “ M,”  
“ M,” “ M,” “ M,” “ S,” “ M,” “ M,” “ M,” “ S,” “ S,” “ M,” “ M,” “ S,”  
“ S,” “ S,” “ S,” “ S,” “ S,” “ S,” “ S,” “ S,” “ S,” “ M,” “ S,” “ S,”  
“ M,” “ M,” “ M,” “ S,” “ S,” “ S,” “ S,” “ S,” “ S,” “ M,” “ M,” “ S,” “ S,”  
“ S,” “ S,” “ -,” “ S,” “ M,”  
“ M,” “ S,” “ S,” “ M,” “ M,” “ M,” “ M,” “ M,” “ M,” “ -,” “ M,” “ M,” “ M,”  
“ M,” “ M,” “ -,” “ M,”  
“ M,” “ M,” “ M,” “ M,” “ M,” “ M,” “ -,” “ M,” “ S,” “ M,” “ S,” “ S,”  
“ S,” “ S,” “ -,” “ M,”  
“ M,” “ M,” “ M,” “ M,” “ M,” “ M,” “ S,” “ S,” “ S,” “ S,” “ M,” “ M,”  
“ M,” “ S,” “ S,” “ S,” “ M,” “ M,” “ S,” “ S,” “ S,” “ S,” “ M,” “ M,”  
“ M,” “ M,” “ M,” “ S”

7.35328,5.84502,5.45702319946517,5.857912,5.739346,7.03750748251314,4.637132919,7.4  
84242,11.83317167,6.936717,6.79529743,5.439629,20,20,5.771893393,7.39747633,4.828001  
665,5.9688367,4.938141087,5.071083736,11.85192488,5.734699481,8.931656592,4.1515963  
68,0.173945488,0.677182875,8.477877778,6.045597011,7.230727541,5.327887506,20,"S,”

“ -,” “ M,” “ -,” “ S,” “ S,” “ -,” “ S,”  
“ S,” “ S,” “ S,” “ -,” “ M,” “ S,” “ -,” “ M,” “ S,” “ M,” “ M,” “ M,” “ M,”  
“ M,” “ S,” “ S,” “ S,” “ S,” “ M,” “ S,”  
“ S,” “ S,” “ S,” “ S,” “ S,” “ S,” “ M,” “ M,” “ M,” “ S,” “ M,” “ M,”  
“ M,” “ S,” “ S,” “ M,” “ M,” “ S,” “ S,” “ M,” “ M,” “ S,” “ S,” “ S,” “ S,”  
“ S,” “ S,” “ S,” “ M,” “ S,” “ M,”  
“ S,” “ S,” “ S,” “ S,” “ M,” “ M,” “ M,” “ M,” “ M,” “ M,” “ S,” “ M,”  
“ M,” “ M,” “ M,” “ M,” “ S,” “ M,” “ S,” “ S,” “ S,” “ S,” “ S,” “ -,” “ S,”  
“ -,” “ S,” “ S,” “ S,” “ S,” “ S,” “ M,” “ M,” “ M,” “ M,” “ M,” “ S,” “ S,”  
“ M,” “ M,” “ M,” “ S,” “ -,” “ -,” “ S,” “ S,” “ S,” “ -,” “ S,” “ S,” “ M,”  
“ M,” “ M,” “ M,” “ M,” “ M,” “ M,” “ M,” “ M,” “ S,” “ S,” “ S,” “ M,”

“ M,” “ M,” “ S,” “ S,” “ -,” “ S,” “ S,” “ M,” “ M,” “ M,” “ M,” “ M,” “ -,”  
“ M,” “ M,” “ M,” “ M,” “ M,” “ S,” “ S,” “ -,” “ S,” “ S,” “ S,” “ S,” “ S,”  
“ S,” “ S,” “ M,” “ S,” “ M,” “ M,” “ S,” “ M,” “ M,” “ M,” “ S,” “ S,”  
“ S,” “ S,” “ S,” “ M,” “ S,” “ M,” “ S,” “ M,” “ M,” “ S,” “ S,” “ M,”  
“ M,” “ M,” “ M,” “ S,” “ S,” “ S,” “ S,” “ S”

### 3. Genotype and phenotype data for the YS cross

"Atenolol," " IsoproterenolHCl," " LiCl," " AntozolinHCl," " Molsidomine," " Cisplatin,"  
" 4-Methylpyrazole hydrochloride," " Nialamide," " Idazoxan hydrochloride,"  
" FluphenazinediHCl," " N-Ethylmaleimide," " DipropyldopamineHBr," " Menadione,"  
" H2O2," " Hydrocortisone 21-hemisuccinate sodium," " 1-[2-(Trifluoromethyl)phenyl]imidazole,"  
" 9-Amino-1,2,3,4-tetrahydroacridine hydrochloride,"  
" Propafenone hydrochloride," " Minoxidil," " Acetylthiocholine chloride," " Cefmetazole sodium,"  
" Phenylephrine hydrochloride," " Alprenolol hydrochloride," " Tiapride hydrochloride,"  
" Benserazide hydrochloride," " Ethosuximide," " Aminoguanidine hemisulfate,"  
" 2,3-Butanedione monoxime," " 1-(m-Chlorophenyl)-biguanide HCl,"  
" Cyproheptadine," " Palmitoyl-DL-Carnitine chloride," " M1\_1," " M1\_2," " M1\_3,"  
" M1\_4," " M2\_1," " M2\_2," " M2\_3," " M2\_4," " M2\_5," " M2\_6," " M2\_7,"  
" M2\_8," " M2\_9," " M2\_10," " M2\_11," " M2\_12," " M2\_13," " M3\_1," " M3\_2,"  
" M3\_3," " M3\_4," " M3\_5," " M4\_1," " M4\_2," " M4\_3," " M4\_4," " M4\_5,"  
" M4\_6," " M4\_7," " M4\_8," " M4\_9," " M4\_10," " M4\_11," " M4\_12," " M4\_13,"  
" M4\_14," " M4\_15," " M4\_16," " M4\_17," " M4\_18," " M4\_19," " M4\_20,"  
" M4\_21," " M4\_22," " M4\_23," " M4\_24," " M4\_25," " M5\_1," " M5\_2," " M5\_3,"  
" M5\_4," " M5\_5," " M5\_6," " M5\_7," " M5\_8," " M5\_9," " M5\_10," " M6\_1,"  
" M6\_2," " M6\_3," " M6\_4," " M7\_1," " M7\_2," " M7\_3," " M7\_4," " M7\_5,"  
" M7\_6," " M7\_7," " M7\_8," " M7\_9," " M7\_10," " M7\_11," " M7\_12," " M7\_13,"  
" M7\_14," " M7\_15," " M7\_16," " M7\_17," " M7\_18," " M8\_1," " M8\_2," " M8\_3,"  
" M8\_4," " M8\_5," " M8\_6," " M8\_7," " M8\_8," " M8\_9," " M9\_1," " M9\_2,"  
" M9\_3," " M9\_4," " M9\_5," " M9\_6," " M9\_7," " M10\_1," " M10\_2," " M10\_3,"  
" M10\_4," " M10\_5," " M10\_6," " M10\_7," " M10\_8," " M10\_9," " M10\_10,"  
" M10\_11," " M10\_12," " M11\_1," " M11\_2," " M11\_3," " M11\_4," " M11\_5,"  
" M11\_6," " M11\_7," " M11\_8," " M11\_9," " M11\_10," " M11\_11," " M12\_1,"  
" M12\_2," " M12\_3," " M12\_4," " M12\_5," " M12\_6," " M12\_7," " M12\_8,"  
" M12\_9," " M12\_10," " M12\_11," " M12\_12," " M12\_13," " M12\_14," " M12\_15,"  
" M12\_16," " M12\_17," " M12\_18," " M13\_1," " M13\_2," " M13\_3," " M13\_4,"  
" M13\_5," " M13\_6," " M13\_7," " M13\_8," " M13\_9," " M13\_10," " M13\_11,"  
" M13\_12," " M13\_13," " M13\_14," " M13\_15," " M14\_1," " M14\_2," " M14\_3,"  
" M14\_4," " M14\_5," " M14\_6," " M14\_7," " M14\_8," " M14\_9," " M14\_10,"







“ Y,” “ S,” “ S,” “ S,”  
“ S,” “ S,” “ Y,” “ Y,” “ Y,” “ -,” “ S,” “ Y,” “ Y,” “ Y,” “ Y,” “ S,” “ S,”  
“ S,” “ S,” “ S,” “ Y,” “ S,” “ Y,” “ Y,” “ S,” “ Y,” “ Y,” “ Y,” “ Y,” “ S,”  
“ S,” “ S,” “ S,” “ Y,” “ Y,” “ S,” “ -,”  
“ Y,” “ Y,” “ S,” “ Y,”  
“ Y,” “ Y,” “ S,” “ S,” “ S,” “ S,” “ S,” “ S,” “ Y,” “ Y,” “ Y,” “ Y,” “ Y,” “ Y,”  
“ S,”  
“ S,” “ S,” “ S,” “ S,” “ S,” “ S,” “ S,” “ S,” “ Y,” “ Y”

6.10444343,3.00864919,2.80915266685687,3.160656293,2.984120338,4.1445248015751,0.9  
49612403,7.404580671,6.315637331,8.70053814,3.58772943,4.148560576,5.488848718,6.97  
3340703,3.756711759,3.433165034,9.39418346,2.58816568,2.769535985,2.465136024,5.110  
887826,2.928172284,2.794771871,2.787106798,11.99117259,3.171052163,2.764257789,3.45  
1374689,2.982472536,3.084428085,4.752368929,"Y," “ Y,” “ Y,” “ Y,” “ Y,” “ Y,”

“ Y,” “ Y,” “ Y,” “ Y,” “ S,” “ Y,” “ Y,” “ -,” “ S,” “ S,” “ S,” “ S,” “ Y,”  
“ Y,” “ S,” “ Y,” “ Y,” “ Y,” “ S,”  
“ S,” “ Y,” “ Y,” “ Y,” “ S,” “ Y,” “ Y,” “ Y,” “ S,” “ S,” “ S,” “ S,” “ S,”  
“ Y,” “ Y,” “ S,” “ S,” “ S,” “ S,” “ S,” “ Y,” “ Y,” “ S,” “ S,” “ S,” “ Y,”  
“ Y,” “ Y,” “ Y,” “ Y,” “ Y,” “ Y,” “ S,” “ Y,” “ S,” “ S,” “ Y,” “ Y,” “ Y,”  
“ Y,” “ Y,” “ Y,” “ Y,” “ Y,” “ Y,” “ S,” “ Y,” “ Y,” “ Y,” “ Y,” “ Y,” “ S,”  
“ S,” “ S,” “ Y,” “ S,” “ S,” “ S,” “ Y,” “ S,” “ S,” “ Y,” “ Y,” “ Y,” “ -,”  
“ Y,” “ Y,” “ Y,” “ Y,” “ S,” “ -,” “ S,” “ S,” “ Y,” “ Y,” “ Y,” “ S,” “ S,”  
“ S,” “ S,” “ S,” “ S,” “ S,” “ Y,” “ Y,” “ S,” “ Y,” “ S,” “ S,” “ S,” “ S,”  
“ Y,” “ Y,” “ Y,” “ Y,” “ Y,” “ Y,” “ -,” “ Y,” “ S,” “ -,” “ S,” “ S,” “ -,”  
“ S,” “ Y,” “ Y,” “ Y,” “ Y,” “ S,” “ S,” “ S,” “ S,” “ S,” “ S,” “ Y,” “ Y,”  
“ Y,” “ S,” “ S,” “ Y,” “ Y,” “ Y,” “ S,” “ S,” “ S,” “ S,” “ S,” “ Y,” “ Y,”  
“ Y,” “ Y,” “ Y,” “ Y,” “ Y,” “ Y,” “ S,”  
“ S,” “ S,” “ Y,” “ S,” “ S,” “ S,” “ S,” “ S,” “ S,” “ S”

4.051597912,3.546624074,7.57548732606876,2.996502227,3.499605629,3.44490302997394,  
0.827027027,6.310654857,6.493524301,20,4.392305174,3.696722315,6.274895393,6.727061  
71,3.879127088,4.078226731,8.900305236,2.710342978,3.108427116,2.479185661,4.382621  
676,3.21017915,4.995866709,3.295280237,3.496293308,4.558846738,3.062173187,3.876753

414,3.241171039,10.60091485,4.812357733,"Y," “ Y,” “ S,” “ S,” “ S,” “ S,” “ Y,”  
“ Y,” “ Y,” “ Y,” “ S,” “ S,” “ Y,” “ -,” “ Y,” “ Y,” “ Y,” “ S,” “ S,” “ S,”  
“ S,” “ S,” “ S,” “ S,” “ Y,” “ Y,” “ Y,” “ S,” “ S,” “ Y,” “ Y,” “ Y,” “ Y,”  
“ Y,” “ S,” “ Y,” “ Y,” “ Y,” “ Y,” “ Y,” “ S,” “ S,” “ Y,” “ S,” “ S,” “ S,”  
“ Y,” “ S,” “ S,” “ S,” “ S,” “ Y,” “ Y,” “ S,” “ S,” “ Y,” “ Y,” “ Y,” “ S,”  
“ Y,” “ S,” “ Y,” “ S,” “ Y,” “ Y,” “ Y,” “ S,” “ S,” “ S,” “ S,” “ Y,” “ Y,”

“ Y,” “ Y,” “ Y,” “ Y,” “ Y,” “ Y,” “ Y,” “ Y,” “ Y,” “ Y,” “ S,” “ S,” “ S,”  
“ S,” “ S,” “ S,” “ S,” “ Y,” “ Y,” “ Y,” “ S,” “ Y,” “ Y,” “ S,” “ S,” “ S,”  
“ S,” “ S,” “ S,” “ S,” “ S,” “ S,” “ S,” “ S,” “ S,” “ S,” “ Y,” “ S,” “ Y,”  
“ S,” “ S,” “ S,” “ S,” “ -,” “ S,” “ S,” “ Y,” “ Y,” “ Y,” “ Y,” “ Y,” “ Y,”  
“ Y,” “ S,” “ S,” “ S,” “ Y,” “ S,”  
“ Y,” “ Y,” “ Y,” “ -,” “ Y,” “ Y,” “ Y,” “ Y,” “ Y,” “ Y,” “ S,” “ -,” “ S,”  
“-,” “ S,” “ S,” “ S,” “ S,” “ S,” “ S,” “ Y,”  
“ Y,” “ -,” “ S,” “ S,” “ Y,” “ Y,” “ Y,” “ S,” “ S,” “ S,” “ S,” “ S,” “ S,”  
“ S,” “ Y,” “ S,” “ S,” “ S,” “ Y,” “ S,” “ S,” “ S,” “ Y,” “ Y,” “ Y,” “ Y,”  
“ S,” “ Y,” “ Y”

4.54899589,3.702026354,9.3562802284073,3.570146258,3.864199424,4.92047506665626,0.  
82464455,10.92006112,6.797873697,6.233930196,3.328832729,8.211813965,9.595669479,5.  
549095425,5.345963419,5.334086206,8.506946094,2.890648377,3.672357013,2.627376512,  
6.758782506,3.994639077,3.504093322,4.04052004,6.784468161,4.488795809,3.521258904,  
5.275254961,3.797011155,3.80271639,6.688702728,"S," “ S,” “ Y,” “ Y,” “ Y,” “ Y,”  
“ Y,” “ Y,” “ Y,” “ S,” “ S,” “ Y,” “ Y,” “ -,” “ S,” “ S,” “ S,” “ S,” “ S,”  
“ S,” “ S,” “ S,” “ S,” “ S,” “ S,” “ Y,” “ Y,” “ Y,” “ Y,” “ Y,” “ Y,” “ S,”  
“ S,” “ S,” “ S,” “ S,” “ Y,” “ Y,” “ S,” “ S,” “ Y,” “ Y,” “ Y,” “ Y,” “ Y,”  
“ Y,” “ Y,” “ S,” “ S,” “ S,” “ S,” “ Y,” “ S,” “ Y,” “ Y,” “ Y,” “ Y,” “ Y,”  
“ Y,” “ Y,” “ Y,” “ S,” “ Y,” “ Y,” “ S,”  
“ S,” “ S,” “ S,” “ Y,” “ Y,” “ S,” “ Y,” “ Y,” “ Y,” “ Y,” “ Y,” “ Y,” “ S,”  
“ S,” “ S,” “ S,”  
“ Y,” “ S,” “ S,” “ Y,” “ S,” “ S,” “ -,” “ S,” “ Y,” “ S,” “ S,” “ S,” “ S,” “ S,”  
“ Y,” “ Y,” “ S,” “ Y,” “ S,” “ S,” “ S,”  
“ S,” “ S,” “ S,” “ S,” “ Y,” “ Y,” “ -,” “ Y,” “ Y,” “ -,” “ Y,” “ Y,” “ -,”  
“ Y,” “ S,” “ Y,”  
“ Y,” “ S,” “ Y,” “ Y,” “ Y,” “ S,” “ -,”  
“ S,” “ Y,” “ Y,” “ S,” “ S,” “ S,” “ S,” “ Y,” “ S,” “ S,” “ S,” “ S,” “ S,”  
“ S,” “ S,” “ S,” “ S,” “ S,” “ Y,” “ S,” “ S,” “ S,” “ S”

3.552770466,2.878127665,2.43795095497252,2.743566064,2.940317115,4.96997594960901,  
1.082321188,6.390390059,5.485319844,10.34634124,4.565555388,3.264171892,4.13438726  
1,8.500729384,3.0595695,3.311814816,5.841327716,2.499167596,2.871920448,2.251729185  
,3.84145544,2.53159517,2.633587765,2.997600656,3.643421418,3.279324581,2.901803902,  
3.905514988,2.950486467,3.405605435,3.947691973,"Y," “ Y,” “ Y,” “ Y,” “ S,”  
“ Y,”  
“ S,” “ Y,”  
“ S,” “ Y,” “ Y,” “ Y,” “ Y,” “ Y,” “ S,” “ S,” “ S,” “ Y,” “ Y,” “ Y,” “ S,”

“ S,” “ S,” “ S,” “ Y,” “ -,” “ Y,” “ Y,” “ S,” “ Y,” “ Y,” “ Y,” “ Y,” “ S,”  
“ S,” “ S,” “ S,” “ Y,” “ S,” “ S,” “ S,” “ S,” “ Y,” “ Y,” “ Y,” “ S,” “ S,”  
“-,” “ S,” “ S,” “ S,” “ S,” “ S,” “ S,” “ Y,” “ Y,” “ Y,” “ S,” “ S,” “ S,”  
“ Y,” “ S,” “ S,” “ S,” “ S,” “ S,” “ S,”  
“ S,” “ Y,” “ Y,” “ Y,” “ S,” “ S,” “ S,” “ S,” “ Y,” “ Y,” “ Y,” “ Y,” “ Y,”  
“ Y,” “ Y,” “ Y,” “ Y,” “ Y,” “ S,” “ -,” “ S,” “ S,” “ S,” “ S,” “ S,” “ S,”  
“ Y,” “ Y,” “ Y,” “ Y,” “ Y,” “ S,” “ S,” “ S,” “ Y,” “ Y,” “ Y,” “ Y,” “ S,”  
“ S,” “ S,” “ S,” “ S,” “ Y,”  
“-,” “ Y,” “ Y,” “ -,” “ S,” “ S,” “ Y,” “ Y,” “ Y,” “ Y,” “ Y,” “ Y,” “ S,”  
“ S,” “ S,” “ Y,” “ S,”  
“ Y,” “ S,”  
“ S,” “ S,” “ S,” “ S,” “ Y,” “ Y,” “ Y,” “ Y,” “ S,” “ S,” “ Y”

3.489024116,3.036210721,5.13743710222952,3.094930332,3.244268723,5.01180460261754,  
0.828644501,5.240679253,7.374750814,20,5.2619284,2.748395885,7.112807379,3.99433098  
4,3.037534877,4.694861091,8.849221742,3.089279865,3.001463334,3.428603138,3.4565623  
61,2.900992341,3.923306014,3.065345091,4.518247842,3.872811012,4.204143021,5.661259

495,4.015199078,4.221476902,5.058689826,"Y," “ Y,” “ Y,” “ S,” “ Y,” “ Y,” “ Y,”  
“ Y,” “ Y,” “ S,” “ Y,” “ S,” “ S,”  
“ S,” “ S,” “ S,” “ S,” “ S,” “ S,” “ S,” “ S,” “ S,” “ S,” “ Y,” “ Y,” “ Y,”  
“ Y,” “ Y,” “ Y,” “ Y,” “ S,” “ -,”  
“ S,” “ Y,” “ Y,” “ Y,” “ Y,” “ Y,” “ Y,” “ S,” “ S,” “ S,” “ S,” “ S,” “ S,”  
“ Y,” “ Y,” “ S,” “ S,” “ S,” “ S,” “ S,” “ Y,” “ S,” “ S,” “ Y,” “ -,” “ S,”  
“ S,” “ S,” “ Y,” “ Y,” “ S,” “ S,” “ S,” “ Y,” “ Y,” “ S,” “ S,” “ S,” “ S,”  
“ S,” “ S,” “ S,” “ Y,”  
“ Y,” “ Y,” “ S,”  
“ S,” “ S,” “ Y,” “ Y,” “ -,” “ Y,” “ S,” “ S,” “ S,” “ Y,” “ S,” “ S,” “ S,”  
“ S,” “ S,” “ S,” “ S,” “ S,” “ S,” “ S,” “ S,” “ S,” “ S,” “ S,” “ S,” “ Y,”  
“ Y,” “ Y,” “ Y,” “ Y,” “ Y,” “ Y,” “ Y,” “ Y,” “ Y,” “ Y,” “ Y,” “ -,” “ Y,”  
“ Y,” “ -,” “ Y,”  
“ Y,” “ Y,” “ Y,” “ Y,” “ Y,” “ Y,” “ Y,” “ Y,” “ Y,” “ Y,” “ Y,” “ Y,” “ Y,”  
“ Y,” “ Y,” “ Y,” “ Y,” “ Y,” “ Y,” “ S,” “ S,” “ Y,” “ S,” “ S,” “ S,” “ Y,”  
“ Y,” “ Y,” “ S,” “ S,” “ S,” “ S,” “ S,” “ S,” “ S”

4.769156033,2.929615767,12.1747390775142,3.490596524,2.960549745,3.86438595694242,  
0.941373534,7.567370843,6.185610527,20,3.073924774,4.892976686,8.829613098,3.172722  
335,3.949723121,6.5989732,10.5216909,2.757317881,2.837612283,2.260539042,3.6494367,  
3.0030869,4.453651084,2.984787982,6.049248184,3.016143233,3.124485996,3.552919206,3

.150445655,12.11916226,5.727879423,"Y," “ Y,” “ S,” “ S,” “ Y,” “ Y,” “ Y,”  
“ Y,” “ Y,” “ Y,” “ Y,” “ Y,” “ Y,” “ S,” “ S,” “ S,” “ Y,” “ S,” “ Y,” “ Y,”

“ S,” “ S,” “ Y,” “ S,” “ S,” “ S,” “ S,” “ S,” “ Y,” “ Y,” “ Y,” “ Y,” “ Y,”  
“ S,” “ Y,” “ S,”  
“ S,” “ S,” “ S,” “ S,” “ S,” “ S,” “ S,” “ S,” “ S,” “ S,” “ Y,” “ S,” “ S,”  
“ S,” “ S,” “ S,” “ Y,” “ Y,” “ Y,” “ Y,” “ Y,” “ Y,” “ S,” “ Y,” “ Y,” “ Y,” “ Y,” “ Y,”  
“ S,” “ S,” “ S,” “ Y,” “ S,” “ S,” “ S,”  
“ S,” “ S,” “ Y,” “ Y,” “ S,” “ S,” “ S,” “ S,” “ S,” “ Y,” “ Y,” “ Y,” “ Y,”  
“ Y,” “ Y,” “ Y,” “ Y,” “ -,” “ Y,” “ Y,” “ S,” “ Y,” “ Y,” “ Y,” “ Y,” “ Y,”  
“ Y,” “ Y,” “ Y,” “ Y,” “ Y,” “ Y,” “ S,” “ S,” “ S,” “ S,” “ S,” “ S,” “ Y,”  
“ Y,” “ Y,” “ Y,” “ S,” “ S,” “ S,” “ S,” “ Y,” “ S,” “ S,” “ -,” “ Y,”  
“ Y,” “ Y,” “ Y,” “ Y,” “ Y,” “ Y,” “ Y,” “ Y,” “ Y,” “ Y,” “ S,” “ S,” “ S,”  
“ Y,” “ Y,” “ Y,” “ Y,” “ S,”  
“ Y,” “ S,” “ S,” “ Y,” “ S,” “ S,” “ Y,”  
“ S,” “ S”

4.907909311,3.62275218,6.5825333315233,3.851140326,3.783599374,5.40094008236665,0.  
896446701,8.837736986,6.003697156,13.83618209,7.137668561,4.241919612,7.22504246,6.  
60414354,3.823718123,4.825845002,8.242279146,3.693312629,3.204815216,3.376246924,4.  
15444126,3.128833823,3.308307791,4.068059457,4.242205513,4.055521793,3.878694611,4.

361130308,4.116263593,3.772842094,5.344408852,"S," “ S,” “ S,” “ Y,” “ Y,” “ Y,”  
“ Y,” “ Y,” “ Y,” “ Y,” “ Y,” “ S,” “ S,” “ S,” “ S,” “ Y,” “ Y,” “ S,” “ S,”  
“ S,” “ S,” “ S,” “ S,” “ S,” “ Y,”  
“ S,” “ -,” “ Y,”  
“ Y,” “ S,” “ Y,” “ Y,” “ Y,” “ S,” “ S,” “ Y,” “ S,” “ S,” “ Y,” “ Y,” “ S,”  
“ S,” “ S,” “ S,” “ Y,” “ Y,” “ -,” “ Y,” “ S,” “ S,” “ Y,” “ Y,” “ Y,” “ Y,”  
“ Y,” “ Y,” “ Y,” “ Y,” “ Y,” “ Y,” “ S,” “ S,” “ Y,” “ Y,” “ Y,” “ Y,” “ Y,”  
“ Y,” “ Y,” “ Y,” “ Y,” “ S,” “ S,” “ S,” “ Y,” “ Y,” “ Y,” “ Y,” “ S,” “ S,”  
“ S,” “ Y,” “ Y,” “ Y,” “ S,” “ Y,” “ Y,” “ S,” “ S,” “ S,” “ S,” “ Y,” “ Y,”  
“ S,” “ Y,” “ Y,” “ Y,” “ S,” “ -,” “ S,” “ S,” “ Y,” “ Y,” “ S,” “ S,” “ S,”  
“ S,” “ S,” “ S,” “ S,” “ Y,” “ Y,” “ Y,” “ S,” “ Y,” “ Y,” “ S,” “ S,”  
“ Y,” “ S,” “ S,” “ S,” “ S,” “ S,” “ Y,”  
“ Y,” “ Y,” “ S,” “ S,” “ S,” “ S,” “ Y,” “ Y,” “ Y,” “ S,” “ S,” “ S,” “ -,”  
“ S,” “ Y,” “ S,” “ Y,” “ S,” “ S,” “ Y,” “ S,”  
“ S,” “ S,” “ S,” “ S,” “ S,” “ Y,” “ Y,” “ S,” “ S,” “ S”

4.186719144,2.796817291,11.8386425691317,3.220281871,2.824406059,3.49787414336827,  
0.961165049,7.956339478,5.486394298,20,3.105069611,4.660881478,8.466095128,3.462230  
471,4.535823852,4.775702769,8.32562118,2.41658488,2.751337983,2.207741284,5.7342959  
1,2.734043563,2.66719116,2.701533183,12.94905088,2.785197264,2.751462256,3.17548726

3,4,5.056872394,5.618973754,"S," " S," " Y,"  
" Y," " Y," " Y," " Y," " Y," " Y," " Y," " Y," " S," " S," " S," " S," " S,"  
" Y," " S," " S," " S," " Y,"  
" Y," " S," " S," " Y,"  
" S," " S," " Y," " Y," " S," " S," " S," " Y," " Y," " S," " Y," " S," " Y,"  
" S," " S," " -, " S," " S," " S," " Y,"  
" S," " S," " Y," " Y," " S," " S," " S," " Y," " Y," " Y," " S," " S," " S,"  
" S," " Y," " Y," " S," " Y," " S," " S," " Y," " Y," " Y," " Y," " S," " S,"  
" S," " Y," " Y," " S," " S," " S," " S," " Y," " Y," " Y," " Y," " S," " S,"  
" Y," " Y," " -, " S," " Y," " Y," " S,"  
" S," " Y," " S," " S," " S,"  
" Y," " Y," " Y," " Y," " Y," " S," " -, " S," " Y," " -, " Y," " Y," " S,"  
" S," " Y," " S," " S," " S,"  
" S," " Y," " S," " S," " S," " S," " S," " Y," " Y," " Y," " Y," " Y," " Y,"  
" Y," " Y," " S," " -, " S,"  
" S," " S," " S," " S," " Y," " Y," " Y"

4.177831076,3.290985262,1.90169419156545,3.070057644,3.343230211,5.18341304403574,  
0.887376238,7.985399618,5.294278535,4.186510346,5.224509917,4.112795268,5.37182287  
9,5.14128107,3.467072266,4.270912602,8.369505789,3.00790618,2.952697879,3.13460621,  
4.188787764,2.794678048,3.518653639,3.320073207,4.49087866,3.910136836,3.615516258,

4.665532167,3.873920126,3.518870736,5.01416635,"S," " S," " S," " S," " S," " S,"  
" S," " S," " S," " Y," " S," " S," " Y," " -, " Y," " S," " S," " S," " Y,"  
" Y," " Y," " Y," " S," " S," " S," " Y," " Y," " Y," " Y," " S," " S," " S,"  
" S," " S," " S," " Y," " Y," " Y," " S,"  
" S," " Y," " Y," " S," " Y," " Y," " -, " S," " S," " Y," " Y," " S," " S,"  
" Y," " S," " S," " Y," " S," " -, " S," " S," " S," " S," " S," " S," " Y,"  
" S," " -, " S," " S," " Y," " Y," " S,"  
" S," " Y," " S," " S," " S,"  
" S," " S," " S," " Y," " S," " -, " Y," " Y," " Y," " S," " Y," " S," " Y,"  
" Y," " Y," " Y," " Y," " S," " -, " S,"  
" S," " S," " Y," " Y," " Y," " Y," " Y," " S," " S," " S," " S," " S," " S,"  
" S," " S," " Y," " S," " S," " S,"  
" S," " Y," " S," " Y,"  
" Y," " S," " Y," " Y," " Y," " Y," " Y," " Y," " S," " S," " Y," " Y," " Y,"  
" Y," " Y," " Y," " Y," " Y," " Y," " S," " S," " Y," " S"

4.764209596,3.474049342,2.81076419592367,4.703434837,3.445172937,4.46967845965322,  
0.76673428,8.103101787,6.765266454,4.512428219,3.492394567,5.689052655,7.02377145,1

0.83875289,4.975946989,5.127381831,10.10609212,3.112140148,3.360734456,2.345105887,  
5.467907295,3.992065886,3.426262285,3.370161699,10.95391126,9.212181201,3.46867660

3,4.095572601,3.798983244,3.59106431,12.51597622,"S," " Y," " Y," " S," " Y,"  
" Y," " Y," " Y," " S," " S," " Y," " Y," " Y," " S," " S," " S," " S," " Y,"  
" Y," " Y," " Y," " Y," " Y," " Y," " S," " S," " S," " S," " S," " S," " Y,"  
" S," " S," " S," " S," " Y," " Y," " Y," " Y," " S," " S," " S," " Y," " Y," " Y," " S,"  
" S," " Y," " Y," " Y," " Y," " S," " S," " S," " Y," " Y," " S," " Y," " S," " Y,"  
" Y," " Y," " Y," " S," " S," " S," " S," " S," " Y," " Y," " Y," " Y," " S,"  
" S," " S," " S," " S," " S," " S," " Y," " S," " Y," " Y," " S," " S," " S,"  
" S," " Y," " Y," " Y," " S," " S," " -," " S," " Y," " S," " S," " S," " S,"  
" S," " S," " S," " Y," " Y," " Y," " S,"  
" S," " S," " S," " S," " Y," " Y," " Y," " Y," " S," " Y," " Y," " Y," " Y,"  
" -," " S," " S," " Y," " Y," " Y," " Y," " Y," " Y," " S," " S," " S," " S,"  
" Y," " Y," " Y," " Y," " S," " S," " S," " S," " Y," " Y," " Y," " S," " S,"  
" Y," " Y," " Y," " Y," " S," " S," " S," " Y," " Y," " Y," " Y," " Y," " Y,"  
" Y," " Y," " Y," " Y," " Y," " S," " S," " S," " S," " S," " S"

4.246488658,2.951355704,2.58513650528576,3.541502542,2.75031474,4.80517316244724,0  
.912768647,6.043276857,4.958050827,10.97056522,4.291012287,3.412985344,4.185072716,  
4.445237493,3.439132276,4.010997253,5.868850806,2.670405702,2.678085079,2.77516167  
8,3.32124134,2.619538456,3.063353713,3.141905846,3.568660397,3.608492767,2.80383916

1,3.138904634,2.948096728,3.022552609,4.711129004,"Y," " S," " S," " -," " Y,"  
" S," " S," " S," " Y," " Y," " Y," " S," " S," " Y," " Y," " Y," " -," " Y,"  
" Y," " Y," " Y," " Y," " Y," " Y," " -," " Y," " Y," " S," " S," " S," " S,"  
" Y," " Y," " S," " Y," " Y," " Y," " S," " S," " S," " S," " S," " S," " Y,"  
" Y," " Y," " Y," " Y," " Y," " Y," " Y," " Y," " Y," " Y," " Y," " Y," " Y,"  
" S," " Y," " Y," " Y," " S," " Y," " Y," " S," " S," " S," " S," " S," " S,"  
" S," " S," " S," " S," " Y," " Y," " Y," " Y," " S," " Y," " S," " S," " S,"  
" S," " Y," " Y," " S," " Y," " S," " S," " S," " Y," " Y," " Y," " Y," " S," " Y,"  
" -," " Y," " Y," " Y," " Y," " Y," " -," " Y," " Y," " S," " S," " Y," " Y,"  
" Y," " Y," " Y," " S," " Y," " Y," " Y," " S," " Y," " Y," " Y," " Y," " S,"  
" S," " S," " S," " S," " S," " Y," " S,"  
" -," " S,"  
" S," " S," " Y," " S," " S," " S," " Y,"  
" Y," " S," " Y," " Y," " Y," " S," " S,"  
" S," " S," " S," " S," " S," " S," " S," " S," " S," " S," " S," " Y"

3.591069884,3.053884104,2.95430793208737,2.94732238,3.594715627,3.45377964573778,0  
.925690021,6.79754185,5.082942995,20,3.486455032,3.328045026,5.876091233,20,4.48993  
5099,6.162768119,8.400567352,2.684469741,2.989012473,2.244429623,3.75552078,3.1421  
0226,2.868301602,3.124136317,6.275509336,10.49071573,3.038084425,3.360208273,2.9070

37707,7.681605681,4.483087645,"Y," " Y," " Y," " S," " Y," " Y," " Y," " S,"  
" S," " S," " Y," " Y," " Y," " S," " S," " Y," " Y," " Y," " S," " S," " S,"  
" S," " S," " S," " S," " S," " S," " S," " S," " S," " S," " S," " Y," " Y,"  
" Y," " Y," " Y," " S," " S," " S," " Y," " Y," " S," " S," " S," " S," " S,"  
" S," " S," " Y," " S,"  
" S," " Y," " S," " Y," " Y," " Y," " S," " S," " Y," " S," " S," " S," " S,"  
" S," " S," " S," " S," " S," " S," " Y," " Y," " S," " S," " S," " Y," " S,"  
" S," " Y," " Y," " -, " S," " Y," " Y," " Y," " S," " Y," " S," " S," " Y,"  
" S," " S," " S," " S," " Y," " Y," " Y," " Y," " Y," " -, " S," " Y," " Y,"  
" Y," " Y," " S," " Y," " -, " S," " S," " -, " Y," " Y," " -, " Y," " S,"  
" S," " -, " S," " S," " S," " -, " Y," " Y," " Y," " S," " S," " S," " S,"  
" Y," " -, " S," " S," " S," " S," " Y," " Y," " Y," " Y," " Y," " Y," " S,"  
" S," " S," " Y," " Y," " Y," " S," " S," " S," " S," " S," " -, " S," " S,"  
" Y," " Y," " Y," " S," " S," " Y," " Y," " Y"

4.613602075,3.481543575,6.09504901830499,3.308887523,3.555899944,5.82092924251403,  
0.879716981,10.87583857,9.803862121,9.184379841,5.55917899,4.604862475,6.62217774,9  
.345742508,4.939781467,4.5699818,7.519564969,3.111853918,3.226903192,3.68793368,4.2  
87347481,3.324946814,3.893569449,3.860482865,5.84219795,5.031795918,3.546975074,4.3

31890375,3.021296832,3.742363076,4.909271175,"Y," " Y," " Y," " Y," " Y," " Y,"  
" Y," " Y," " Y," " S," " S," " S," " S," " -, " Y," " Y," " Y," " Y," " Y,"  
" Y," " Y," " Y," " S," " S," " S," " Y," " S," " S," " Y," " Y," " Y," " Y,"  
" Y," " Y," " Y," " Y," " Y," " Y," " Y," " S," " S," " S," " S," " S," " S,"  
" S," " S," " S," " Y,"  
" Y," " Y," " S," " S," " S," " S," " S," " Y," " Y," " S," " S," " S," " S," " Y," " S,"  
" S," " S," " S," " Y," " Y," " Y," " Y," " Y," " S," " S," " Y," " S," " -, " Y,"  
" Y," " Y," " Y," " Y," " Y," " -, " S," " S," " Y," " S," " S," " Y," " Y,"  
" Y," " Y," " S," " S," " S," " Y," " S,"  
" S," " S," " S," " S," " S," " Y," " Y," " S," " S," " -, " S," " S," " -,  
" S," " S," " Y," " S," " S," " S," " S,"  
" S," " S," " Y," " Y," " S," " S," " S," " S," " -, " S," " S," " S," " S,"

" S," " S," " S," " Y," " Y," " Y," " Y," " S," " Y," " Y," " Y," " Y," " Y,"  
" S," " -," " S," " S"

3.512276315,2.979456866,3.5175895378987,2.839109594,2.996049309,5.88370913850175,0  
.898496241,6.26723379,20,8.073516968,4.500676712,3.093629317,5.888043472,4.53861367  
2,2.982780656,4.628678365,6.653816331,2.985057363,2.867944823,2.773894484,3.6174281  
5,2.796589416,3.100640031,3.149697228,3.452003843,3.166251147,3.167118344,3.5862785

81,2.968243238,4.195441784,3.4498274,"Y," " Y," " S," " Y," " Y," " S," " S,"  
" Y," " S," " S," " S,"  
" S," " S," " S," " S," " S," " S," " S," " S," " S," " S," " S," " S," " Y,"  
" Y," " Y," " Y," " Y," " Y," " S," " S," " S," " S," " Y," " Y," " Y," " Y,"  
" Y," " Y," " Y," " S," " Y," " Y," " Y," " Y," " S," " Y," " -," " Y," " Y,"  
" Y," " Y," " Y," " Y," " Y," " S," " S," " Y," " Y," " Y," " Y," " -," " Y,"  
" S," " S," " S," " S," " Y," " Y," " Y," " S," " Y," " S," " S," " S," " S,"  
" Y," " Y," " Y," " Y," " S," " S," " S," " S," " S," " S," " Y," " Y," " Y,"  
" Y," " Y," " Y," " Y," " S," " S," " S," " S," " S," " Y," " Y," " -," " Y,"  
" S," " Y," " Y," " Y," " -," " Y," " Y," " S," " S," " S," " S," " S," " S,"  
" S," " S," " Y," " Y," " S," " Y," " Y," " Y," " Y," " S," " S," " S," " Y,"  
" Y," " Y," " Y," " S," " Y," " Y," " S," " S," " S," " S," " Y," " -," " Y,"  
" Y," " -," " Y," " Y," " Y," " S," " S," " Y," " Y," " Y," " Y," " Y," " Y,"  
" Y," " S," " S," " Y," " S," " Y,"  
" Y," " S,"  
" S," " S," " S," " S," " S," " Y," " S," " Y," " Y"

4.163035454,3.900531512,8.15281400240827,3.507829023,3.311813181,3.80102339401112,  
0.996039604,11.45387128,7.570770649,20,4.180921275,4.429867853,6.756438831,6.174551  
839,4.762598127,4.50946627,11.65379773,2.761793316,3.50371908,2.441769632,6.1049509  
49,3.612539996,3.749367926,3.460864442,20,3.384318694,3.188640332,3.735281329,3.374

315068,4.381479733,7.862114821,"S," " Y," " Y," " S," " Y," " Y," " Y," " S,"  
" S," " -," " Y," " Y," " Y," " S," " -," " -," " S," " -," " S," " S," " S,"  
" S," " Y," " S," " Y," " Y," " Y," " Y," " -," " Y," " Y," " Y," " Y," " Y,"  
" S," " S," " S," " S," " Y," " S," " S," " S," " S," " Y," " Y," " Y," " -," " S,"  
" S," " S," " S," " S," " S," " S," " S," " S," " S," " Y," " S," " Y," " S," " S,"  
" S," " Y," " S," " -," " S," " S," " S," " Y," " Y," " S," " S," " S," " S,"  
" S," " S," " S," " S," " S," " S," " Y,"  
" Y," " Y," " S," " S," " Y," " S,"  
" S," " S," " S," " Y," " S," " S," " S," " S," " Y," " S," " S," " S," " S,"  
" S," " Y," " Y," " -," " S," " S," " Y," " Y," " S," " S," " S," " S," " S,"  
" S," " S," " S," " Y," " Y," " Y," " Y," " Y," " S," " S," " S," " Y," " Y,"  
" Y," " Y," " Y," " S," " S," " S," " S," " -," " S," " S," " -," " S," " S,"



" S," " S," " S," " S," " S," " S," " S," " S," " S," " S," " Y," " Y," " S,"  
" S," " Y," " S," " Y," " Y," " Y,"  
" Y," " Y," " Y," " S," " S," " Y," " S,"  
" S," " S," " S," " S," " Y," " Y," " Y," " Y"

5.85512587,2.772776819,3.34337820003958,3.542239631,3.150689104,4.59496290748339,0  
.964285714,6.695638525,4.539253168,13.8998867,2.785764814,3.977343217,6.049106256,3  
.642508774,3.987465361,5.723430167,10.53103405,2.598875335,2.748455419,2.271747347,  
4.054183596,2.855395601,2.995733668,2.665294999,11.66168821,12.81847386,2.70064713  
8,3.22673265,2.887784876,4.00891288,7.662073918,"S," " S," " Y," " Y," " Y,"

" S," " -," " Y," " Y," " Y," " S,"  
" S," " Y," " S," " S," " Y," " S,"  
" S," " S," " S," " Y," " S,"  
" S," " -," " S," " Y," " S," " S," " S," " S,"  
" Y," " S," " S," " Y," " S," " S,"  
" S," " S," " S," " S," " Y," " Y," " S,"  
" S," " S," " S," " S," " S," " S," " S," " S," " Y," " Y," " Y," " Y," " Y,"  
" Y," " Y," " S," " Y," " Y," " Y," " Y," " Y," " S," " S," " S," " Y," " Y,"  
" Y," " S," " S," " S," " S," " Y," " -," " Y," " S," " S," " S," " S," " S,"  
" S," " S," " S," " S," " S," " Y," " Y," " S," " S," " Y," " S," " S," " S,"  
" Y," " S," " -," " S," " Y,"  
" -," " Y," " Y," " Y," " Y," " Y," " S," " S," " Y," " Y," " Y," " Y," " Y,"  
" Y," " Y," " Y," " S," " S," " Y,"  
" Y," " Y," " Y," " Y," " S," " S," " S," " Y," " Y," " -," " Y," " Y," " Y,"  
" -," " Y," " -"

5.259193932,3.396900499,14.305058585237,3.450936684,3.654190751,5.52688624678294,1  
.01584507,12.60650671,6.916876694,20,3.010095703,4.777611868,8.410991251,4.04290126  
3,6.220860765,6.272341905,10.75118775,2.774423486,3.420602364,2.460723186,4.6247501  
73,3.668724242,6.911792237,3.750289811,5.020419156,10.58185095,3.148496506,4.418485  
101,3.436159684,15.3023031,6.047392762,"S," " S," " S," " S," " S," " Y," " Y,"

" S," " S," " Y," " Y," " Y," " S," " -," " S," " S," " S," " S," " S," " S,"  
" Y," " Y," " Y," " Y," " S," " S," " S," " S," " Y," " Y," " S," " S," " S,"  
" S," " S," " Y," " Y," " Y," " Y," " S,"  
" Y," " S," " Y," " Y,"  
" Y," " Y," " Y," " Y," " -," " S," " S," " S," " S," " Y," " S," " S," " S,"  
" Y," " Y," " Y," " Y," " Y," " S," " Y," " S," " S," " Y," " Y," " Y," " Y,"  
" Y," " Y," " Y," " S," " Y," " S," " S,"  
" S," " Y," " Y," " Y," " Y," " S,"  
" S," " S," " S," " Y," " -," " Y," " Y," " Y," " Y," " S," " S," " S," " Y,"

“ Y,” “ S,” “ -,” “ S,” “ Y,” “ Y,”  
“ Y,” “ Y,” “ S,” “ S,” “ Y,” “ Y,” “ Y,” “ S,” “ -,” “ S,” “ S,” “ -,” “ S,”  
“ Y,” “ S,” “ S,” “ S,” “ S,” “ Y,” “ Y,” “ Y,” “ Y,” “ S,” “ S,” “ S,” “ S,”  
“ S,” “ Y,” “ Y,” “ Y,” “ Y,” “ S,” “ S,” “ Y,” “ S,” “ S,” “ S,” “ S,” “ S,” “ S,”  
“ S,” “ S,” “ S,” “ S,” “ S,” “ S,” “ Y,” “ S,” “ S,” “ Y,” “ Y,” “ Y,” “ Y,”  
“ Y,” “ Y,” “ Y,” “ Y,” “ Y,” “ Y,” “ Y,” “ Y,” “ Y”

3.431528912,3.104606772,7.32344281980168,2.873299632,2.625033561,4.31921048067822,  
0.855233853,8.045141172,5.408957345,12.30727568,4.684608309,3.632176394,4.90735023  
3,6.227082627,3.076637791,4.031368803,6.448901151,2.667156192,2.631565675,2.8111464  
,3.109546239,2.559836442,3.003098835,2.935116904,3.121685662,2.831575147,3.23736684

4,3.375073588,3.164907,3.093532017,5.052399217,"Y," “ Y,” “ Y,” “ Y,” “ S,” “ S,”  
“ Y,” “ S,” “ S,” “ S,” “ S,” “ Y,”  
“ Y,” “ Y,” “ Y,” “ Y,” “ Y,” “ Y,” “ Y,” “ Y,” “ S,” “ Y,” “ Y,” “ Y,” “ Y,”  
“ Y,” “ Y,” “ Y,” “ Y,” “ Y,” “ S,”  
“ S,” “ S,” “ S,” “ Y,” “ Y,” “ S,” “ S,” “ S,” “ S,” “ Y,” “ Y,” “ S,” “ S,” “ Y,”  
“ Y,” “ Y,” “ Y,” “ Y,” “ Y,” “ S,” “ S,” “ S,” “ S,” “ S,” “ S,” “ Y,” “ S,” “ S,”  
“ S,” “ S,” “ Y,” “ Y,” “ S,” “ Y,” “ Y,” “ Y,” “ Y,” “ Y,” “ Y,” “ S,” “ Y,” “ Y,”  
“ Y,” “ Y,” “ Y,” “ S,” “ S,” “ S,” “ S,” “ Y,” “ Y,” “ Y,” “ Y,” “ S,” “ Y,”  
“ Y,” “ Y,” “ Y,” “ Y,” “ S,” “ -,” “ Y,” “ S,” “ Y,” “ Y,” “ Y,” “ S,” “ S,”  
“ Y,” “ Y,” “ Y,” “ Y,” “ S,” “ Y,” “ Y,” “ S,” “ S,” “ Y,” “ Y,” “ Y,” “ Y,”  
“ S,” “ S,” “ S,” “ Y,” “ S,” “ S,” “ Y,” “ Y,” “ S,” “ S,” “ S,” “ Y,” “ -,”  
“ S,” “ Y,” “ Y,” “ Y,”  
“ Y,” “ S,” “ S,” “ S,” “ Y,” “ Y,” “ Y,” “ Y,” “ S,” “ S,” “ S,” “ S,” “ S,”  
“ S,” “ Y,” “ S,” “ S,” “ S,” “ S,” “ -,” “ S,” “ S,” “ S,” “ S,” “ S,” “ Y,”  
“ Y,” “ Y,” “ Y,” “ Y,” “ Y,” “ Y,” “ Y,” “ S,” “ S,” “ S”

4.471347151,3.754641542,3.23753124343033,3.92906451,4.621606887,4.03940872875091,0  
.943686007,8.832346304,5.751200175,13.48678154,3.625816771,4.290647774,8.436396562,  
4.26698696,10.41131528,7.413555821,10.93045644,2.872320117,4.060176242,3.303294036,  
8.801405585,3.781443371,3.914472134,3.252661373,11.15880945,10.49548883,3.28321456

6,4.261084989,3.790315747,3.268806972,9.87216002,"-," “ Y,” “ S,” “ -,” “ Y,” “ S,”  
“ S,” “ S,” “ S,” “ -,” “ S,” “ S,” “ Y,” “ -,” “ S,” “ S,” “ -,” “ S,” “ S,”  
“ S,” “ S,” “ S,” “ S,” “ S,” “ -,” “ Y,” “ S,” “ Y,” “ S,” “ S,” “ S,” “ Y,”  
“ Y,” “ Y,” “ Y,” “ Y,” “ Y,” “ Y,” “ Y,” “ Y,” “ Y,” “ Y,” “ -,” “ S,” “ S,”  
“ S,” “ S,” “ Y,” “ S,”  
“ S,” “ S,” “ Y,” “ S,”  
“ S,” “ Y,” “ Y,” “ Y,” “ Y,” “ Y,” “ Y,” “ S,” “ S,” “ S,” “ Y,” “ Y,” “ Y,” “ Y,”  
“ Y,” “ Y,” “ Y,” “ Y,” “ S,” “ Y,” “ Y,” “ Y,” “ S,” “ Y,” “ Y,” “ S,” “ S,”

“ S,” “ S,” “ S,” “ S,” “ Y,” “ Y,” “ Y,” “ Y,” “ S,” “ S,” “ S,” “ S,” “ S,”  
“ S,” “ S,” “ S,” “ S,” “ S,” “ -,” “ S,” “ S,” “ S,” “ S,” “ S,” “ S,” “ Y,”  
“ S,” “ S,” “ S,” “ S,” “ Y,” “ Y,” “ Y,” “ S,” “ S,” “ S,” “ S,” “ S,” “ S,”  
“ S,” “ S,” “ S,” “ S,” “ S,” “ S,” “ S,” “ S,” “ S,” “ S,” “ S,” “ S,” “ -,”  
“ S,” “ Y,” “ S,” “ S,” “ Y,” “ S,” “ S,”  
“ Y,” “ Y,” “ Y,” “ Y,” “ Y,” “ S,” “ -,”  
“ S,” “ S,” “ Y,” “ Y,” “ S,” “ Y,” “ Y,”  
“ Y,” “ Y,” “ Y,” “ Y,” “ Y,” “ S,” “ S,” “ S,” “ Y,” “ -”

3.713604724,3.141994374,2.36421891253653,3.0338585,3.234347086,5.82563689276448,0.  
939626784,6.427106373,4.240348088,20,4.822020191,3.794530055,5.706359898,4.3287676  
38,3.244506075,4.257483569,7.267949827,2.760651753,2.747372765,3.180684695,3.400991  
296,2.697148774,4.297029162,2.993541503,3.266339212,3.838031881,3.141425084,4.60095

8891,2.892916173,6.461292893,5.124408333,"Y," “ Y,” “ Y,” “ Y,” “ Y,” “ Y,” “ Y,”  
“ Y,” “ Y,” “ Y,” “ Y,” “ Y,” “ Y,” “ Y,” “ Y,” “ S,” “ S,” “ S,” “ Y,” “ Y,”  
“ Y,” “ Y,” “ Y,” “ Y,” “ S,” “ S,” “ Y,” “ Y,” “ Y,” “ Y,” “ S,” “ S,” “ S,”  
“ S,” “ Y,” “ Y,” “ Y,” “ Y,” “ S,” “ S,” “ S,” “ S,” “ S,” “ Y,” “ Y,” “ Y,” “ Y,”  
“ Y,” “ S,” “ Y,” “ Y,” “ Y,” “ Y,” “ Y,” “ S,” “ Y,” “ Y,” “ S,” “ S,” “ S,”  
“ S,” “ Y,” “ Y,” “ Y,” “ Y,” “ Y,” “ S,” “ S,” “ S,” “ S,” “ S,” “ S,” “ -,” “ S,”  
“ S,” “ S,” “ S,” “ Y,” “ Y,” “ Y,” “ S,” “ S,” “ Y,” “ Y,” “ Y,” “ Y,” “ Y,”  
“ Y,” “ Y,” “ Y,” “ Y,” “ Y,” “ S,”  
“ S,” “ S,” “ S,” “ Y,” “ -,” “ Y,”  
“ Y,” “ Y,” “ Y,” “ Y,” “ Y,” “ S,” “ Y,”  
“ Y,” “ -,” “ S,” “ S,” “ S,” “ Y,” “ Y,” “ Y,” “ Y,” “ Y,” “ S,” “ S,” “ S,”  
“ S,” “ S,” “ Y,” “ Y,” “ Y,” “ S,” “ S,” “ S,” “ S,” “ S,” “ S,” “ Y,” “ S,” “ S,”  
“ S,” “ Y,” “ S,” “ S,” “ S,” “ S,” “ Y,” “ -,” “ S,” “ S,” “ S,” “ -,” “ S,”  
“ S,” “ S,” “ S,” “ S,” “ Y,” “ Y,” “ Y,” “ Y,” “ -”

5.324059291,3.249626758,10.1462722315611,3.711257937,3.055416299,3.87361900869128,  
0.952961672,7.492351994,5.831007772,20,3.655706488,4.545811261,7.460793954,4.091802  
077,4.43346356,6.203480653,7.671943345,2.682642246,3.082791616,2.412238709,6.138448  
762,3.51136869,3.343946792,3.262773598,12.34176621,5.166166058,3.046107162,3.788775

103,3.013081813,4.255311676,8.740863852,"Y," “ -,” “ S,” “ S,” “ Y,” “ -,” “ Y,”  
“ Y,” “ Y,” “ S,” “ S,” “ -,” “ Y,” “ -,” “ Y,” “ Y,” “ S,” “ Y,” “ Y,” “ S,”  
“ S,” “ Y,” “ -,”  
“ S,” “ Y,” “ Y,” “ S,” “ S,”  
“ S,” “ S,” “ Y,” “ S,”  
“ S,” “ Y,” “ Y,” “ S,” “ S,”

“ S,” “ S,” “ S,” “ S,” “ S,” “ -,” “ S,” “ Y,” “ Y,” “ Y,” “ Y,” “ Y,” “ Y,”  
“ S,” “ S,” “ S,” “ S,” “ S,” “ Y,” “ Y,” “ Y,” “ S,” “ S,” “ Y,” “ S,” “ S,”  
“ S,” “ S,” “ S,” “ S,” “ S,” “ S,” “ Y,” “ S,” “ S,” “ S,” “ S,” “ S,” “ S,”  
“ S,” “ S,” “ S,” “ S,” “ -,” “ Y,” “ Y,” “ S,” “ S,” “ S,” “ Y,” “ Y,” “ Y,”  
“ Y,” “ Y,” “ Y,” “ Y,” “ Y,” “ Y,” “ Y,” “ Y,” “ Y,” “ Y,” “ S,” “ Y,” “ S,”  
“ Y,” “ Y,” “ S,” “ S,” “ Y,” “ Y,” “ Y,” “ Y,” “ -,” “ Y,” “ S,” “ -,” “ S,”  
“ Y,” “ Y,” “ S,” “ S,” “ S,” “ Y,” “ S,” “ Y,”  
“ Y,” “ S,” “ S,” “ S,” “ Y,” “ S,” “ Y,” “ -,” “ Y,” “ Y,” “ Y,” “ Y,” “ Y,”  
“ Y,” “ Y,” “ Y,” “ Y,” “ Y,” “ Y,” “ S,” “ S,” “ S,” “ S,” “ S,” “ Y,” “ Y,”  
“ Y,” “ Y,” “ S,” “ S,” “ S,” “ S,” “ Y,” “ Y,” “ Y”

3.822184959,2.277268309,4.27957705386609,2.569083081,2.265211494,3.52418629782609,  
0.95210728,5.475665117,4.519023373,20,3.542663325,3.916371028,6.000754625,3.6486576  
96,3.315677447,4.218589725,7.597775757,2.291572121,2.366472957,2.342287395,4.243959  
208,2.514798294,3.111531697,2.785155235,11.67235931,10.62939672,2.459026522,2.87201

8274,2.715213342,4.150527948,5.872797872,"Y," “ S,” “ Y,” “ S,” “ S,” “ S,” “ S,”  
“ S,” “ S,” “ S,” “ Y,” “ Y,” “ Y,” “ Y,” “ Y,” “ Y,” “ S,” “ S,” “ Y,” “ Y,”  
“ Y,” “ Y,” “ Y,” “ Y,” “ Y,” “ Y,” “ Y,” “ Y,” “ S,” “ S,” “ S,” “ Y,” “ Y,”  
“ Y,” “ -,” “ Y,” “ S,” “ Y,”  
“ S,”  
“ S,” “ S,” “ Y,” “ S,” “ S,” “ S,” “ S,” “ S,” “ S,” “ Y,” “ Y,” “ S,” “ S,”  
“ S,” “ S,” “ S,” “ S,” “ S,” “ S,” “ S,” “ S,” “ S,” “ Y,” “ Y,” “ -,” “ S,”  
“ S,” “ Y,” “ Y,” “ Y,” “ Y,” “ Y,” “ S,” “ S,” “ Y,” “ Y,” “ Y,” “ S,” “ S,” “ S,”  
“ S,” “ Y,” “ Y,” “ Y,” “ -,” “ Y,” “ Y,” “ Y,” “ Y,” “ S,” “ S,” “ S,” “ S,”  
“ S,” “ Y,” “ Y,” “ Y,” “ Y,” “ Y,” “ Y,” “ S,” “ Y,” “ Y,” “ Y,” “ Y,” “ Y,”  
“ Y,” “ S,” “ -,” “ S,” “ Y,” “ -,” “ Y,”  
“ Y,” “ S,” “ S,” “ S,” “ S,” “ S,” “ Y,” “ Y,” “ Y,” “ Y,” “ Y,” “ S,” “ S,” “ S,”  
“ Y,” “ S,” “ S,” “ -,” “ Y,” “ Y,” “ Y,” “ -,” “ Y,” “ Y,” “ Y,” “ -,” “ S,”  
“ S,” “ S,” “ S,” “ S,” “ S,” “ S,” “ Y,”  
“ Y,” “ S,” “ Y,” “ Y”

4.019561846,3.634014886,8.70035284868537,2.843753082,3.377686818,4.49892624288831,  
0.915904936,6.937547108,20,20,4.576742096,3.978769182,7.469403859,2.997798048,4.427  
472148,6.347612679,8.898538618,2.94852083,3.600696353,2.984619494,7.719834505,3.722  
469581,3.946318539,3.813064068,4.004457647,4.756686028,3.454538553,5.408142853,3.65

5661898,4.806671039,4.454952139,"S," “ Y,” “ Y,” “ Y,” “ S,” “ S,” “ S,” “ S,”  
“ S,” “ S,” “ S,” “ S,” “ S,” “ -,” “ Y,” “ Y,” “ S,” “ Y,” “ Y,” “ S,” “ Y,”  
“ Y,” “ S,” “ Y,”  
“ Y,” “ Y,” “ Y,” “ Y,” “ Y,” “ S,” “ S,” “ S,” “ S,” “ S,” “ S,” “ Y,” “ Y,”

“ S,” “ Y,” “ S,” “ S,” “ S,” “ S,” “ S,”  
“ S,” “ Y,” “ S,” “ S,”  
“ S,” “ Y,” “ S,” “ S,” “ S,” “ S,” “ S,” “ Y,” “ Y,” “ Y,” “ Y,” “ Y,” “ Y,”  
“ Y,” “ Y,” “ Y,” “ S,” “ Y,” “ S,” “ S,” “ S,” “ S,” “ Y,” “ Y,” “ Y,” “ S,”  
“ S,” “ Y,” “ S,” “ Y,” “ Y,” “ Y,” “ Y,”  
“ S,” “ S,” “ Y,” “ -,” “ Y,” “ Y,” “ S,” “ S,” “ S,” “ S,” “ S,” “ Y,” “ Y,”  
“ Y,” “ Y,” “ Y,” “ Y,” “ S,” “ S,” “ S,” “ Y,” “ Y,” “ Y,” “ Y,” “ Y,” “ Y,”  
“ Y,” “ S,” “ S,” “ S,” “ Y,” “ Y,” “ Y,” “ S,” “ S,” “ S,” “ -,” “ S,” “ S,”  
“ Y,”  
“ Y,” “ Y,” “ -,” “ Y,” “ S,” “ S,” “ S,” “ S,” “ Y,” “ S,” “ -,” “ S,” “ Y,”  
“ Y,” “ Y,” “ -,” “ Y,” “ S,” “ Y,” “ Y,” “ Y,” “ Y,” “ Y,” “ S,” “ S,” “ S,”  
“ S,” “ S,” “ S,” “ S,” “ S,” “ S,” “ S,” “ Y”

5.547584395,4.630233649,4.51351307321813,4.588675907,3.734251267,5.55130200446007,  
1.661971831,9.029487578,0.391664124,4.703272686,7.24470356,6.497963187,10.134449,20,  
4.849177802,20,7.152524718,6.262051282,4.558685978,5.18183965,12.02825309,4.339979  
048,5.151554777,4.330001386,20,9.419106957,4.726015609,4.056813744,5.566098982,4.89

1709682,6.904429399,"S," “ S,” “ S,” “ S,” “ Y,” “ Y,” “ S,” “ S,” “ S,” “ S,”  
“ S,” “ S,” “ S,” “ -,” “ S,” “ S,” “ Y,” “ S,” “ Y,” “ Y,” “ Y,” “ S,” “ S,”  
“ S,” “ S,” “ S,” “ S,” “ S,” “ S,” “ S,” “ S,” “ S,” “ S,” “ S,” “ S,” “ S,”  
“ S,” “ Y,” “ Y,” “ S,” “ S,” “ Y,” “ Y,” “ S,” “ Y,” “ Y,” “ Y,” “ Y,” “ Y,”  
“ Y,” “ Y,” “ Y,” “ Y,” “ S,” “ S,” “ S,” “ S,” “ S,” “ Y,” “ Y,” “ S,” “ Y,”  
“ Y,” “ -,” “ S,” “ S,” “ S,” “ S,” “ S,” “ Y,” “ Y,” “ S,” “ S,” “ S,” “ S,”  
“ S,” “ Y,” “ Y,” “ Y,” “ Y,” “ Y,” “ S,” “ S,” “ S,” “ S,” “ Y,” “ S,” “ Y,” “ S,”  
“ Y,” “ Y,” “ Y,” “ S,” “ Y,”  
“ Y,” “ Y,” “ Y,” “ S,” “ Y,” “ Y,” “ S,” “ S,” “ S,” “ S,” “ Y,” “ Y,” “ Y,”  
“ Y,” “ -,” “ S,” “ Y,” “ Y,” “ S,”  
“ S,” “ S,” “ S,” “ S,” “ S,” “ S,” “ S,” “ Y,” “ Y,” “ Y,” “ Y,” “ Y,” “ Y,”  
“ S,” “ S,” “ S,” “ S,” “ Y,” “ Y,” “ Y,” “ Y,” “ Y,” “ -,” “ Y,” “ Y,” “ Y,” “ Y,”  
“ Y,” “ Y,” “ Y,” “ Y,” “ S,” “ S,” “ S,” “ S,” “ S,” “ S,” “ Y,” “ S,” “ S,”  
“ S,” “ S,” “ Y,”  
“ Y,” “ Y,” “ -,” “ Y,” “ S,” “ S,” “ S,” “ S,”  
“ S,” “ S,” “ S,” “ S,” “ Y,” “ S”

5.374935752,4.129759666,8.23279609047128,4.398952326,3.95859206,4.13353973353158,0  
.916827853,7.782757641,7.695458284,4.650381356,4.549252849,4.401692565,6.134131318,  
4.748417367,6.763482956,4.319671494,9.77937355,3.137539263,3.972859387,2.82521235,8  
.191218093,4.362878491,3.272060604,3.281817913,7.574656399,8.64439574,3.449114861,4

.169924143,3.583780204,3.327352128,8.155941597,"Y," “ Y,” “ Y,” “ Y,” “ Y,” “ S,”  
“ S,” “ S,” “ S,” “ S,” “ S,” “ S,” “ Y,” “ -,” “ S,” “ S,” “ S,” “ S,” “ S,”

“ S,” “ Y,” “ Y,” “ S,” “ Y,” “ S,” “ Y,”  
“ Y,” “ Y,” “ Y,” “ Y,” “ S,” “ Y,” “ S,”  
“ S,” “ S,” “ S,” “ S,” “ Y,”  
“ Y,” “ Y,” “ Y,” “ Y,” “ Y,” “ Y,” “ Y,” “ Y,” “ Y,” “ Y,” “ Y,” “ Y,” “ Y,”  
“ S,” “ S,” “ S,” “ S,” “ S,” “ Y,” “ Y,” “ S,” “ Y,” “ Y,” “ Y,” “ Y,” “ Y,”  
“ Y,” “ Y,” “ S,” “ S,” “ S,” “ S,” “ S,” “ Y,” “ Y,” “ S,” “ S,” “ S,” “ S,”  
“ Y,” “ Y,” “ Y,” “ S,” “ S,” “ S,” “ Y,”  
“ Y,” “ Y,” “ Y,” “ Y,” “ Y,” “ -,” “ Y,” “ S,” “ S,” “ S,” “ S,” “ S,” “ S,”  
“ S,” “ S,” “ S,” “ S,” “ S,” “ Y,” “ S,” “ S,” “ S,” “ S,” “ S,” “ S,” “ Y,”  
“ S,” “ S,” “ S,” “ Y,” “ S,” “ S,” “ -,” “ S,” “ Y,” “ Y,” “ Y,” “ S,” “ -,”  
“ S,” “ S,” “ Y,” “ S,” “ S,” “ S,” “ Y,” “ Y,” “ S,” “ S,” “ S,” “ S,” “ S,”  
“ S,” “ S,” “ S,” “ S,” “ S,” “ S,” “ S,” “ S,” “ S,” “ S,” “ S,” “ S,” “ S,”  
“ Y,” “ Y,” “ Y,” “ Y,” “ S,” “ Y,” “ Y,” “ S,” “ S,” “ Y,” “ Y,” “ Y,” “ Y,”  
“ Y,” “ Y,” “ Y,” “ Y,” “ Y,” “ Y,” “ Y,” “ Y,” “ Y,” “ Y,” “ Y,” “ Y”

4.433474582,3.245297456,5.98733400114995,2.805039049,2.99331374,6.38104339929056,1  
.0486618,6.527233687,5.174665157,4.834557139,4.936749838,4.5225427,4.556618554,5.02  
4875163,3.628470985,3.590881942,5.515808771,2.685100451,2.848630772,2.297595451,4.3  
82477079,2.98523617,2.918944869,3.373215484,4.364161358,3.495425546,3.111569155,3.6

04009188,3.019943557,2.746027846,4.170569483,"S," “ S,” “ S,” “ S,” “ Y,” “ Y,”  
“ S,” “ -,” “ Y,” “ S,” “ S,” “ S,” “ S,”  
“ S,” “ S,” “ S,” “ S,” “ Y,” “ Y,” “ Y,” “ S,” “ S,” “ S,” “ Y,” “ Y,” “ Y,”  
“ S,” “ S,” “ S,” “ Y,” “ S,”  
“ S,” “ S,” “ Y,” “ S,” “ Y,” “ S,” “ S,” “ Y,”  
“ Y,” “ Y,” “ Y,” “ Y,” “ S,” “ Y,” “ Y,” “ S,” “ Y,” “ Y,” “ Y,” “ Y,” “ Y,”  
“ S,” “ Y,” “ Y,” “ Y,” “ S,” “ S,” “ S,”  
“ S,” “ S,” “ S,” “ S,” “ S,” “ -,” “ Y,” “ Y,” “ S,” “ S,” “ S,” “ S,” “ Y,”  
“ Y,” “ S,” “ S,” “ S,” “ S,” “ Y,” “ S,” “ S,” “ S,” “ S,” “ Y,” “ Y,” “ S,”  
“ Y,” “ Y,” “ Y,” “ Y,” “ Y,” “ S,” “ S,” “ S,” “ Y,” “ Y,” “ Y,” “ Y,” “ -,”  
“ Y,” “ S,” “ Y,” “ Y,” “ Y,” “ Y,” “ Y,” “ Y,” “ S,” “ S,” “ S,” “ S,” “ S,”  
“ Y,” “ Y,” “ S,” “ S,” “ S,” “ S,” “ S,” “ S,” “ Y,” “ S,” “ Y,” “ Y,” “ Y,”  
“ Y,” “ Y,” “ S,” “ Y,” “ Y,” “ Y,” “ S,” “ Y,” “ S,” “ S,” “ S,” “ S,” “ S,”  
“ S,” “ Y,” “ S,” “ Y,” “ Y,” “ S,” “ S,” “ Y,” “ Y,” “ Y”

7.025837423,3.612810814,9.92167317666184,3.463802265,3.638287059,3.78255413535864,  
1.019332162,7.080289254,6.131499924,6.445379454,3.891741528,5.772635092,7.20515960  
4,4.398701528,4.781569258,4.945921725,6.997094532,2.809734091,3.084519941,2.4295818  
81,5.666427624,3.613016275,3.029027325,3.339741543,4.329908278,5.913910269,3.168457

703,3.791859485,3.05091325,2.805154474,5.407944163,"S," " S," " Y," " Y," " S,"  
" S," " S," " S," " S," " S," " S," " S," " Y," " -," " S," " S," " S," " Y,"  
" S," " S," " S," " Y," " Y," " Y," " S," " S," " S," " Y," " S," " Y," " Y,"  
" S," " S," " Y," " Y," " S," " S," " S," " S," " S," " S," " Y," " Y," " Y,"  
" Y," " Y," " Y," " S," " Y," " S,"  
" S," " Y," " S," " S," " S," " S," " S,"  
" S," " S," " S," " Y,"  
" S," " Y," " Y," " S," " Y," " Y," " Y," " S," " S," " Y," " Y," " Y," " Y,"  
" Y," " Y," " S," " S," " S," " S," " -," " S," " S," " S," " S," " S," " S,"  
" S," " Y," " Y," " Y," " S," " Y," " Y," " Y," " S," " S," " S," " S," " S,"  
" S," " S," " S," " S," " S," " S," " S," " S," " Y," " Y," " -," " Y," " Y,"  
" -," " Y," " S," " Y," " S," " S," " S,"  
" S," " S," " S," " S," " S," " S," " Y," " Y," " Y," " Y," " S," " S," " S,"  
" Y," " Y," " Y," " Y," " S," " Y," " Y," " Y," " S," " Y," " S," " S," " S,"  
" Y," " Y"

4.43252678,3.303856418,16.4261112044112,3.124935298,3.074052944,5.75113646715883,0  
.928484848,5.889365746,5.107466496,4.41234518,3.646854744,4.140798365,4.365455519,5  
.02139415,3.995181554,4.404706955,7.924537883,3.002067602,2.84442628,2.845504957,3.  
321751506,2.929949021,3.377294445,3.008054041,8.13573791,4.071365715,3.088321834,3.

015119241,3.324447343,3.774134237,6.07409402,"Y," " S," " S," " S," " S," " S,"  
" S," " S," " S," " S," " Y," " Y," " Y," " S," " S," " S," " Y," " Y," " -,"  
" S," " S," " S," " Y,"  
" Y," " Y," " Y," " Y," " Y," " Y," " Y," " Y," " Y," " Y," " Y," " Y," " Y,"  
" Y," " Y," " S," " S," " Y," " -," " Y," " Y," " S," " Y," " Y," " Y," " S,"  
" S," " S," " S," " S," " S," " Y," " S," " S,"  
" S," " S," " S," " S," " S," " S," " S," " S," " S," " Y," " Y," " Y," " S," " Y,"  
" Y," " Y," " Y," " Y," " Y," " Y," " Y," " Y," " Y," " Y," " Y," " Y," " Y,"  
" S," " Y," " Y," " Y," " Y," " -," " S," " Y," " S," " S," " S," " S," " S,"  
" S," " S," " S," " S," " S," " S," " S," " S," " S," " S," " S," " S," " S,"  
" S," " S," " S," " Y," " S," " Y," " -,"  
" Y," " Y," " S,"  
" S," " S," " S," " S," " Y," " Y," " S," " S," " S," " S," " S," " S," " Y,"  
" Y," " Y," " Y," " Y," " Y," " S," " S," " Y," " Y," " Y," " Y," " Y," " Y,"  
" Y," " Y," " Y," " Y," " Y," " Y," " Y," " Y," " Y," " Y"

4.360827851,3.39171768,5.66589280157818,3.328632957,4.027863274,5.15683685889182,0  
.934090909,9.852620275,2.713653376,6.563758574,6.557338699,5.257177526,6.170435388,

4.556844332,4.025854655,4.652416172,6.878298299,3.134073297,3.211756998,3.70922979  
2,4.007120926,3.225522166,3.801389752,3.794641133,5.205225686,4.181241781,3.8604765  
2,4.323579231,3.144378556,3.90024807,5.063894956,"S," " Y," " Y," " S," " Y,"  
" Y," " Y," " Y," " -, " Y," " Y," " Y," " Y," " S," " S," " S," " S," " S,"  
" S," " S," " S," " Y," " S," " Y,"  
" Y," " Y," " Y," " Y," " S," " S," " S," " S," " S," " Y," " Y," " Y," " Y,"  
" S," " Y," " -, " S," " S," " S," " -, " S," " S," " S," " S," " Y," " Y,"  
" Y," " Y," " Y," " Y," " Y," " S," " Y," " Y," " Y," " S," " Y," " Y," " S,"  
" S," " Y," " Y," " S," " Y," " S,"  
" Y,"  
" -, " Y," " Y," " Y," " Y," " Y," " -, " S," " S," " S," " S," " Y," " Y,"  
" S," " S," " S," " S," " Y," " Y," " Y," " Y," " S," " S," " Y," " S," " S,"  
" S," " Y," " S," " S," " S," " Y," " Y,"  
" -, " Y," " S," " S," " Y,"  
" Y," " Y," " Y," " S," " S," " S," " Y," " Y," " Y," " S," " S," " S," " S,"  
" S," " S," " S," " S," " S," " S," " S," " S," " Y," " S," " S," " S," " S,"  
" S," " S," " S," " Y," " Y," " Y," " Y," " S," " S," " Y," " S"

5.01207758,3.788353349,8.21619821315623,3.649922306,4.1513035,4.56947655540817,0.8  
99014778,10.70130031,3.07207987,7.76593638,4.146634012,5.682892665,7.473510629,20,6  
.383444285,4.50828167,10.37067996,2.826856423,3.522556576,2.827926306,5.797935979,3  
.485402335,3.889304534,4.963108386,9.570932975,4.565153758,3.275898693,4.920699065,  
3.537431844,5.104247205,8.518452416,"Y," " Y," " Y," " Y," " S," " S," " Y,"  
" Y," " Y," " S," " S," " S," " Y," " -, " Y," " Y," " Y," " Y," " Y," " Y,"  
" Y," " Y," " S," " Y," " S," " S," " S," " S," " Y," " Y," " Y," " Y," " Y,"  
" Y," " Y," " Y," " Y," " Y," " Y," " Y," " S," " S," " S," " S," " S," " -,  
" Y," " S," " S," " S," " S," " S," " S," " Y," " Y," " Y," " Y," " S," " S," " S,"  
" S," " S," " S," " S," " Y," " Y," " Y," " Y," " S," " S," " S," " S," " Y,"  
" S," " Y," " Y," " Y," " Y," " S," " S,"  
" S," " S," " S," " S," " S," " S," " S," " S," " S," " S," " Y," " S," " S," " Y,"  
" Y," " Y," " Y," " Y," " -, " S," " Y," " Y," " Y," " S," " S," " S," " S,"  
" S," " S," " S," " S," " S," " S," " S," " S," " S," " S," " S," " S," " Y," " S,"  
" S," " S," " S," " S," " S," " S," " Y," " S," " S," " S," " Y," " -, " Y,"  
" Y," " Y," " S," " S," " S," " Y," " Y," " Y," " S," " S," " S," " S," " S,"  
" S," " S," " S," " S," " S," " S," " Y," " Y," " S," " S," " S," " S," " Y,"  
" Y," " Y," " Y," " Y," " Y," " Y," " Y," " Y," " Y," " Y," " Y," " Y,"  
" Y," " Y," " Y," " Y," " Y," " Y," " Y," " Y," " S"



4.928977778,3.819378909,10.773289808181,3.005370941,4.186988748,4.29037345859379,0.  
.922981366,10.941404,6.996808123,5.352705985,5.589379867,6.10637127,5.092858375,7.4  
76241478,5.014228444,3.872552357,4.982274441,2.933523923,3.790450002,2.796485441,4.  
706509542,3.752241255,3.143045018,4.599183186,4.068103633,4.257764601,3.679030882,  
4.529671321,2.953120737,3.034754318,3.719685943,"Y," " Y," " Y," " Y," " S,"  
" S," " Y," " Y," " S," " S," " S," " S," " S," " S," " -," " S," " S," " Y," " Y,"  
" S," " S," " S," " Y," " Y," " S," " S," " S," " S," " S," " S," " Y," " Y," " Y,"  
" Y," " Y," " Y," " Y," " S," " S," " Y," " Y," " Y," " S," " S," " S," " S," " S,"  
" S," " -," " S," " Y," " Y," " Y," " S," " S," " Y," " Y," " Y," " Y," " Y," " Y,"  
" Y," " Y," " Y," " Y," " S," " S," " -," " S," " S," " S," " S," " S," " S," " Y,"  
" Y," " Y," " Y," " Y," " Y," " Y," " S," " S," " S," " Y," " S," " Y," " Y,"  
" Y," " Y," " Y," " Y," " Y," " Y," " Y," " Y," " S," " S," " S," " S," " S,"  
" S," " Y," " Y," " Y," " Y," " Y," " S,"  
" S," " Y," " Y," " Y," " Y," " Y," " -," " Y," " Y," " Y," " Y," " S," " S,"  
" S," " S," " S," " S," " S," " S," " S," " S," " S," " Y," " S," " S," " S," " S,"  
" Y," " Y," " Y," " Y," " S," " S," " Y," " Y," " Y," " S," " S," " Y," " Y,"  
"-," " Y," " S," " Y," " S," " Y," " S,"  
" S," " S," " Y," " Y," " S," " S," " Y,"  
" Y," " Y," " Y," " Y," " Y," " Y," " Y," " Y," " Y," " S," " S," " Y," " Y,"  
" Y," " Y," " S," " Y," " Y," " Y"

4.593643536,3.460678316,6.70697306621628,3.113909394,3.400449096,6.44527435006757,  
0.972257251,11.80778204,6.568876693,3.083610922,5.266436956,3.597484619,5.00977385  
3,5.455812955,4.287940657,4.821953907,6.747518462,2.987697654,2.938255604,2.9140593  
36,3.813947549,2.837099133,3.132507965,3.080551307,4.845405077,3.682005279,3.232423  
776,3.776509791,3.132449023,3.350398076,5.407500148,"S," " Y," " Y," " Y," " Y,"  
" S," " -," " Y," " Y," " Y," " S,"  
" Y," " Y," " Y," " Y," " Y," " Y," " S," " S," " S," " S," " S," " S," " Y,"  
" Y," " Y," " S," " S," " S," " S," " Y," " Y," " Y," " Y," " Y," " Y," " S,"  
" Y," " Y," " Y," " S," " S," " S," " -," " S," " S," " S," " S," " Y," " Y,"  
" Y," " Y," " Y," " Y," " Y," " S,"  
" Y," " Y," " Y," " S," " S," " S," " Y," " Y," " Y," " Y," " S," " Y," " Y,"  
"-," " Y," " S," " S," " Y," " Y," " -," " Y," " Y," " S," " S," " S," " S,"  
" S," " S," " S," " S," " S," " S," " S," " S," " S," " S," " Y," " Y," " S," " S,"  
" Y," " S," " S," " S," " S," " S," " S," " Y," " Y," " Y," " -," " S," " S,"  
"-," " Y," " S," " S," " Y," " Y,"  
" Y," " Y," " S," " Y," " S," " S,"

“ S,” “ Y,” “ Y,” “ Y,” “ Y,” “ Y,” “ Y,”  
“ Y,” “ Y,” “ Y,” “ Y,” “ S,” “ S,” “ S,” “ S,” “ Y,” “ Y,” “ Y”

3.975476787,3.489566955,8.38842494063089,3.758771141,3.765418195,3.71642950947995,  
0.942716858,7.922731394,6.353519044,7.923834736,4.088536162,7.320886911,7.11686173  
7,3.929849629,5.276329244,4.836353218,9.013651202,3.246677141,3.576573884,2.9301063  
05,3.62141467,3.859484387,3.995262227,4.054944799,8.973005508,10.09894783,3.6028028

96,4.37044025,3.812351261,3.291961906,6.492165534,"S," " S," " Y," " Y," " Y,"  
“ Y,” “ S,” “ S,” “ S,” “ Y,” “ S,”  
“ S,” “ S,” “ S,” “ S,” “ S,” “ S,” “ Y,”  
“ S,” “ S,” “ S,” “ Y,” “ S,”  
“ S,” “ S,” “ S,” “ S,” “ S,” “ S,” “ S,” “ S,” “ S,” “ S,” “ S,” “ S,” “ S,” “ S,”  
“ S,” “ S,” “ Y,” “ Y,” “ Y,” “ Y,” “ Y,” “ Y,” “ S,” “ Y,” “ Y,” “ Y,” “ Y,”  
“ Y,” “ Y,” “ Y,” “ Y,” “ S,” “ S,” “ Y,” “ S,” “ S,” “ S,” “ S,” “ Y,” “ Y,”  
“ Y,” “ Y,” “ Y,” “ Y,” “ Y,” “ Y,” “ Y,” “ S,” “ S,” “ S,” “ S,” “ Y,” “ S,”  
“ S,” “ S,” “ S,” “ S,” “ Y,” “ Y,” “ -,” “ S,” “ Y,” “ S,” “ Y,” “ Y,” “ Y,”  
“ Y,” “ Y,” “ S,” “ S,” “ S,” “ Y,” “ Y,” “ Y,” “ Y,” “ Y,” “ S,” “ S,” “ Y,” “ Y,”  
“ Y,” “ S,” “ S,” “ S,” “ S,” “ Y,” “ Y,” “ Y,” “ Y,” “ Y,” “ S,” “ S,” “ Y,” “ Y,”  
“-,” “ Y,” “ S,” “ S,” “ S,” “ S,” “ S,”  
“ S,” “ S,” “ S,” “ S,” “ S,” “ Y,” “ S,” “ S,” “ S,” “ S,” “ S,” “ Y,” “ Y,”  
“ S,” “ S,” “ S,” “ Y,” “ Y,” “ Y,” “ Y,” “ Y,” “ S,” “ S,” “ Y,” “ Y,” “ Y,”  
“ Y,” “ Y,” “ Y,” “ Y,” “ S,” “ Y,” “ Y,” “ Y,” “ Y,” “ S,” “ S,” “ Y”

4.063347011,3.32511007,11.4480264158064,4.315481278,3.55924343,3.39244551776038,0.  
786427146,7.894037618,5.316255614,10.95426919,5.257264396,4.624772366,6.138904568,  
3.173629653,5.260739891,4.336919753,10.08378019,4.561280629,3.874488264,2.71577084  
2,4.813532857,2.921794477,3.688351208,3.603349491,3.555345519,6.185727213,2.9269898

52,4.345200175,3.197293456,4.089919633,4.071735731,"Y," " Y," " Y," " Y," " S,"  
“ S,” “ -,” “ Y,” “ Y,” “ Y,” “ Y,”  
“ Y,” “ Y,” “ Y,” “ Y,” “ S,” “ S,” “ S,” “ S,” “ S,” “ Y,” “ Y,” “ Y,” “ Y,”  
“ Y,” “ Y,” “ Y,” “ Y,” “ Y,” “ Y,” “ Y,” “ Y,” “ Y,” “ Y,” “ S,” “ S,” “ Y,”  
“ S,” “ S,” “ Y,” “ Y,”  
“ S,” “ S,” “ Y,” “ S,” “ Y,” “ S,” “ Y,” “ S,”  
“ S,” “ S,” “ Y,” “ Y,” “ Y,” “ Y,” “ -,” “ Y,” “ Y,” “ S,” “ Y,” “ Y,” “ Y,”  
“ Y,” “ Y,” “ Y,” “ Y,” “ Y,” “ Y,” “ Y,” “ Y,” “ Y,” “ S,” “ Y,” “ Y,” “ Y,”  
“ Y,” “ Y,” “ Y,” “ Y,” “ Y,” “ Y,” “ Y,” “ Y,” “ Y,” “ Y,” “ Y,” “ Y,” “ Y,”

“ -,” “ Y,” “ S,” “ S,” “ Y,” “ Y,” “ S,”  
“ S,” “ S,” “ S,” “ S,” “ S,” “ S,” “ S,” “ S,” “ S,” “ S,” “ S,” “ Y,” “ S,”  
“ S,” “ S,” “ S,” “ S,” “ S,” “ S,” “ Y,” “ S,” “ S,” “ S,” “ S,” “ Y,” “ Y,”  
“ Y,” “ Y,” “ Y,” “ S,” “ S,” “ Y,” “ Y,” “ Y,” “ Y,” “ Y,” “ S”

4.17081424,2.890672196,2.98360560833432,3.281108955,3.006833015,5.10039283246428,1  
.085585586,5.770061533,5.078571198,6.548445336,3.49473409,4.580287809,5.404929666,5  
.388304945,4.750951791,5.505763853,9.955509163,2.419048476,2.821876575,2.409017054,  
9.360591061,3.411920907,2.998856253,2.838290754,11.47352852,3.481370438,2.78405656  
9,4.137738827,2.740041616,3.010058763,6.530762843,"S," “ S,” “ S,” “ S,” “ S,”

“ S,” “ S,” “ S,” “ S,” “ S,” “ S,” “ S,” “ Y,” “ -,” “ S,” “ S,” “ S,” “ S,”  
“ S,” “ Y,” “ S,” “ S,” “ Y,” “ Y,” “ S,”  
“ S,” “ S,” “ S,” “ Y,”  
“ Y,” “ Y,” “ Y,” “ S,” “ S,” “ Y,” “ Y,” “ Y,” “ S,” “ S,” “ S,” “ Y,” “ Y,”  
“ Y,” “ Y,” “ Y,” “ Y,” “ S,” “ S,” “ S,” “ S,” “ Y,” “ Y,” “ Y,” “ Y,” “ Y,”  
“ S,” “ S,” “ S,” “ S,” “ S,” “ Y,” “ Y,” “ Y,” “ S,” “ S,” “ S,” “ Y,” “ Y,”  
“ Y,” “ Y,” “ Y,” “ Y,” “ Y,” “ Y,” “ Y,” “ S,” “ S,” “ Y,” “ Y,” “ S,” “ S,”  
“ S,” “ S,” “ S,” “ Y,” “ Y,” “ Y,” “ -,” “ S,” “ S,” “ Y,” “ Y,” “ Y,” “ Y,”  
“ S,” “ S,” “ S,” “ S,” “ Y,” “ Y,” “ Y,” “ Y,” “ S,” “ S,” “ S,” “ S,” “ Y,”  
“ S,” “ Y,” “ Y,” “ Y,” “ Y,” “ Y,” “ S,”  
“-,” “ Y,” “ Y,” “ S,” “ Y,” “ Y,” “ Y,” “ Y,” “ S,” “ S,” “ S,” “ S,” “ Y,”  
“ Y,” “ Y,” “ Y,” “ Y,” “ Y,” “ Y,” “ Y,” “ Y,” “ Y,” “ S,” “ S,” “ S,” “ S,” “ S,”  
“ Y,” “ Y,” “ Y,” “ Y,” “ Y,” “ Y,” “ S,” “ Y,” “ S,” “ Y,” “ Y,” “ Y,” “ Y,”  
“ Y,” “ Y,” “ Y,” “ Y,” “ S,” “ S,” “ S,” “ Y,” “ Y,” “ S,” “ Y”

3.417239042,3.004692605,14.4461589577192,3.676596625,3.565240255,7.64839333091421,  
0.913202934,4.393023001,3.794216432,20,3.801217057,2.851416609,4.135752273,7.478902  
526,3.283356868,0.171233784,6.218716073,2.536730016,2.530938834,2.302642369,3.21428  
1574,2.229799135,3.385287744,3.095264417,2.581112543,2.805027413,2.868070131,5,11.4  
2579977,5.086722377,8,"Y," “ S,” “ -,”

“ Y,” “ Y,” “ Y,” “ Y,” “ -,” “ -,” “ S,” “ S,” “ Y,” “ Y,” “ Y,” “ S,” “ Y,”  
“ S,” “ Y,” “ S,” “ S,” “ S,”  
“ S,” “ S,” “ Y,” “ Y,” “ Y,” “ S,” “ S,” “ S,” “ S,” “ -,” “ Y,” “ Y,” “ Y,”  
“ Y,” “ Y,” “ Y,” “ Y,” “ Y,” “ Y,” “ Y,” “ S,” “ S,” “ S,” “ S,” “ S,” “ Y,”  
“ Y,” “ -,” “ Y,” “ Y,” “ Y,” “ Y,” “ S,” “ Y,” “ Y,” “ Y,” “ Y,” “ S,” “ S,”  
“ Y,” “ Y,” “ Y,” “ Y,” “ Y,” “ Y,” “ S,” “ S,” “ Y,” “ Y,” “ Y,” “ Y,” “ Y,”  
“ S,” “ Y,” “ Y,” “ Y,” “ Y,” “ S,” “ Y,”  
“ Y,” “ Y,” “ Y,” “ S,” “ S,” “ S,” “ Y,” “ Y,” “ Y,” “ Y,” “ Y,” “ S,” “ S,”  
“ S,” “ -,” “ Y,” “ S,” “ S,” “ S,” “ S,” “ S,” “ Y,” “ Y,” “ Y,” “ S,” “ S,”

“ Y,” “ Y,” “ Y,” “ Y,” “ Y,” “ S,” “ S,” “ S,” “ S,” “ -,” “ Y,” “ Y,” “ -,”  
“ S,” “ Y,” “ S,” “ S,” “ S,” “ -,” “ S,” “ S,” “ -,” “ S,” “ Y,” “ S,” “ S,”  
“ S,” “ Y,” “ S,” “ S,” “ Y,”  
“ Y,” “ Y,” “ S,” “ S,” “ -,” “ S,” “ Y,” “ Y,” “ Y,” “ Y,” “ Y,” “ S,” “ S,”  
“ S,” “ Y,” “ Y,” “ S,” “ S,” “ S,” “ S,” “ Y,” “ Y,” “ Y,” “ Y,” “ Y,” “ Y,”  
“ Y,” “ S,” “ S,” “ Y,” “ Y,” “ Y”

4.158538179,3.314614869,3.48035175610093,3.436002859,3.578230858,4.05592152638228,  
0.92495637,5.731210897,9.530219091,10.8390326,3.733787267,3.794086746,6.253130679,5  
.780366623,3.66026381,5.259487769,8.507280739,2.646871801,3.729589435,2.599485872,4  
.599600053,3.329223405,3.063403832,3.413721654,6.311721382,4.359251985,3.009371006,

3.535919681,3.241432458,3.419858999,4.779071769,"Y," “ Y,” “ Y,” “ Y,” “ S,”  
“ S,” “ Y,” “ Y,” “ Y,” “ Y,” “ S,” “ S,” “ Y,” “ -,” “ Y,” “ S,” “ S,” “ S,”  
“ S,” “ S,” “ Y,” “ S,” “ S,” “ S,” “ Y,” “ S,”  
“ S,” “ Y,” “ Y,” “ Y,” “ Y,” “ S,” “ Y,”  
“ Y,” “ S,” “ S,” “ S,” “ S,” “ Y,” “ Y,” “ -,” “ Y,” “ Y,” “ Y,” “ Y,” “ S,” “ S,”  
“ S,” “ S,” “ S,” “ S,” “ Y,” “ Y,” “ Y,” “ Y,” “ S,” “ S,” “ Y,” “ Y,” “ Y,” “ Y,”  
“ Y,” “ Y,” “ Y,” “ Y,” “ Y,” “ Y,” “ Y,” “ Y,” “ Y,” “ S,” “ S,” “ S,” “ S,”  
“ S,” “ S,” “ S,” “ S,” “ S,” “ S,” “ -,” “ Y,”  
“ S,” “ S,” “ S,” “ S,” “ S,” “ Y,” “ Y,” “ Y,” “ S,” “ S,” “ S,” “ S,” “ Y,”  
“ Y,” “ S,” “ Y,” “ Y,” “ Y,” “ Y,” “ S,”  
“-,” “ S,” “ S,” “ Y,” “ Y,” “ S,” “ S,” “ Y,” “ Y,” “ Y,” “ Y,” “ S,” “ Y,”  
“ S,” “ Y,” “ Y,” “ S,” “ S,” “ S,” “ S,” “ Y,” “ Y,” “ Y,” “ Y,” “ S,” “ Y,”  
“ Y,” “ S,” “ S,” “ S,” “ Y,” “ Y,” “ Y,” “ Y,” “ S,” “ S,” “ Y,” “ Y,” “ Y,”  
“ S,” “ Y,” “ Y,” “ Y,” “ Y”

3.977582947,3.234909957,9.5934653871765,3.953131139,3.226068094,4.03062115363149,0  
.885433715,5.640057539,9.067680316,6.453893899,3.088228841,4.513373493,10.34011534,  
5.292794676,4.673344965,4.568864624,9.043226357,2.747387041,3.018975915,2.31479222  
8,4.339334046,3.332325293,2.867575963,2.943333915,9.441976457,9.36104733,2.94168724

2,3.462006232,3.040741978,3.340569608,9.784864786,"S," “ S,” “ S,” “ Y,” “ S,”  
“ S,” “ S,” “ S,” “ Y,” “ S,” “ S,” “ Y,”  
“ S,” “ Y,” “ Y,” “ Y,” “ Y,” “ Y,” “ S,” “ S,” “ S,” “ S,” “ S,” “ -,” “ Y,”  
“ Y,” “ Y,” “ Y,” “ S,” “ S,” “ Y,” “ -,” “ S,” “ S,” “ S,” “ S,” “ Y,” “ Y,”  
“ Y,” “ Y,” “ S,” “ S,” “ S,” “ S,” “ Y,” “ Y,” “ S,” “ Y,” “ S,” “ S,” “ S,”  
“ S,” “ S,” “ S,” “ Y,”  
“-,” “ Y,” “ Y,” “ Y,” “ Y,” “ Y,” “ Y,” “ -,” “ Y,” “ S,” “ S,” “ Y,” “ Y,”  
“ S,” “ -,” “ Y,” “ Y,” “ S,” “ Y,” “ Y,” “ S,” “ S,” “ Y,” “ -,” “ Y,” “ Y,”

“ Y,” “ Y,” “ Y,” “ Y,” “ Y,” “ Y,” “ S,” “ S,” “ Y,” “ Y,” “ Y,” “ Y,” “ S,”  
“ -,” “ Y,” “ -,” “ Y,” “ -,” “ Y,” “ -,” “ -,” “ Y,” “ Y,” “ S,” “ -,” “ -,” “ Y,”  
“ S,” “ S,” “ S,” “ S,” “ Y,” “ Y,” “ Y,” “ Y,” “ S,” “ -,” “ S,” “ -,” “ -,”  
“ S,” “ S,” “ -,” “ S,” “ S,” “ S,” “ -,” “ S,” “ Y,” “ Y,” “ Y,” “ Y,” “ -,”  
“ Y,” “ Y,” “ -,” “ -,” “ Y,” “ S,” “ Y,” “ -,” “ S,” “ Y,” “ Y,” “ Y,” “ Y,”  
“ Y,” “ Y,” “ Y,” “ -,” “ Y,” “ S,” “ S,” “ S,” “ S,” “ S,” “ Y,” “ Y,” “ Y,”  
“ Y,” “ Y,” “ S,” “ Y,” “ Y,” “ Y,”  
“ Y,” “ -,” “ S,” “ S,” “ S,” “ S,” “ Y,” “ Y,” “ Y,” “ Y”

4.885509016,3.177085878,2.94677096428373,2.843736919,3.533474257,6.26592551435438,  
0.993742178,5.61274765,8.742129368,14.2514928,4.174008531,5.36589741,4.638603423,3.  
908965276,4.344590504,3.88296096,7.057608772,2.780213956,2.979530569,2.606890479,3.  
968497802,3.007664524,3.355617451,3.253358477,4.858107971,3.872007372,3.51263251,3.

233969121,3.193912617,3.035775301,6.151013631,"S," “ Y,” “ S,” “ S,” “ Y,” “ S,”  
“ S,” “ S,” “ S,” “ S,” “ S,” “ S,” “ S,” “ -,” “ S,” “ S,” “ S,” “ S,” “ Y,”  
“ Y,” “ Y,” “ Y,” “ Y,” “ Y,” “ S,”  
“ S,” “ S,” “ S,” “ S,” “ S,” “ -,” “ Y,” “ Y,” “ -,” “ Y,” “ Y,” “ Y,” “ Y,”  
“ -,” “ S,” “ S,” “ Y,” “ S,”  
“ Y,” “ Y,” “ S,” “ S,” “ S,” “ -,” “ S,” “ S,” “ S,” “ S,” “ S,” “ S,” “ -,”  
“ S,” “ S,” “ Y,” “ Y,” “ Y,” “ S,” “ -,” “ S,” “ Y,” “ S,” “ S,” “ S,” “ S,”  
“ S,” “ S,” “ S,” “ S,” “ S,” “ S,” “ S,” “ S,” “ S,” “ S,” “ Y,” “ Y,” “ Y,”  
“ Y,” “ Y,” “ Y,” “ Y,” “ Y,” “ Y,” “ Y,” “ Y,” “ Y,” “ Y,” “ S,” “ S,” “ S,”  
“ S,” “ S,” “ -,” “ Y,” “ Y,” “ -,” “ Y,” “ -,” “ S,” “ S,” “ S,” “ -,” “ S,”  
“ S,” “ S,” “ -,” “ S,” “ S,” “ S,” “ Y,” “ S,” “ S,” “ S,” “ S,” “ S,” “ -,”  
“ Y,” “ Y,” “ -,” “ S,” “ S,” “ Y,” “ Y,” “ Y,” “ Y,” “ Y,” “ S,” “ S,” “ -,”  
“ S,” “ S,” “ -,” “ S,” “ S,” “ S,” “ Y,” “ S,” “ S,” “ S,” “ S,” “ S,” “ S,”  
“ S,” “ S,” “ Y,” “ Y,” “ S,”  
“ Y,” “ Y,” “ Y,” “ Y,” “ S,” “ S,” “ S,” “ Y,” “ S,” “ Y,” “ Y,” “ Y,” “ -,”  
“ S,” “ S,” “ S,” “ Y,” “ Y,” “ Y,” “ Y,” “ Y,” “ S,” “ S”

3.465097569,2.956464205,11.5234937283361,2.929797133,2.917252643,5.34497856124434,  
0.970454545,5.694451362,6.587319849,20,4.428005565,4.121027482,4.827659629,7.076591  
252,3.146928145,4.260307045,6.684218389,2.872381939,2.647625854,2.78045627,3.096690  
321,2.590051718,3.386207412,2.870494319,3.292431983,3.300779256,2.866954927,3.22305

0363,3.178950239,3.154374534,4.070049867,"Y," “ -,” “ -,” “ -,” “ -,” “ -,” “ S,”  
“ S,” “ S,” “ S,” “ Y,” “ -,” “ Y,” “ Y,” “ Y,” “ Y,” “ -,” “ Y,” “ Y,” “ Y,”  
“ Y,” “ S,” “ Y,” “ Y,” “ -,” “ Y,” “ Y,” “ Y,” “ Y,” “ -,” “ Y,” “ Y,” “ -,” “ -  
,” “ -,” “ Y,” “ Y,” “ -,” “ Y,” “ S,” “ S,” “ S,” “ S,” “ Y,” “ Y,” “ Y,” “ Y,”  
“ Y,” “ -,” “ Y,” “ Y,” “ Y,” “ Y,” “ S,” “ S,” “ Y,” “ Y,” “ Y,” “ S,” “ S,”  
“ S,” “ Y,” “ Y,” “ -,” “ Y,” “ -,” “ S,” “ S,” “ S,” “ -,” “ -,” “ S,” “ S,”

“ S,” “ S,” “ S,” “ S,” “ -,” “ Y,” “ Y,” “ Y,” “ Y,” “ S,” “ S,” “ -,” “ Y,”  
“ Y,” “ Y,” “ S,” “ S,” “ S,” “ S,” “ Y,” “ -,” “ S,” “ Y,” “ Y,” “ Y,” “ Y,”  
“ Y,” “ Y,” “ Y,” “ Y,” “ Y,” “ Y,” “ S,” “ S,” “ Y,” “ S,” “ -,” “ Y,” “ -,”  
“ S,” “ -,” “ S,” “ -,” “ -,” “ Y,” “ Y,” “ Y,” “ -,” “ -,” “ Y,” “ Y,” “ Y,”  
“ Y,” “ Y,” “ Y,” “ Y,” “ S,” “ S,” “ S,” “ -,” “ Y,” “ -,” “ -,” “ S,” “ S,”  
“ S,” “ Y,” “ Y,” “ Y,” “ -,” “ Y,” “ Y,” “ Y,” “ Y,” “ Y,” “ -,” “ Y,” “ Y,”  
“-,” “ -,” “ S,” “ S,” “ Y,” “ -,” “ S,” “ S,” “ S,” “ Y,” “ Y,” “ Y,” “ Y,”  
“ Y,” “ -,” “ Y,” “ S,” “ Y,” “ S,” “ S,”  
“ S,” “ S,” “ S,” “ S,” “ S,” “ S,” “ S,” “ -,” “ Y,” “ Y,” “ Y,” “ Y,” “ -,”  
“ Y,” “ -,” “ Y,” “ S,” “ S,”

4.022688192,2.88979072,11.3919835199195,3.025580599,3.029563942,3.41521953066307,0  
.981096408,5.555393486,4.365535547,20,3.472972042,3.464040186,9.927035474,3.8537117  
4,4.093508461,3.983694868,9.437151522,2.452946473,2.83351176,2.427372564,4.54866545  
5,2.710219749,6.015973022,3.107505349,4.998920143,2.783160205,3.165754298,3.4140286

37,3.070046366,11.07993103,3.851975423,"S," “ Y,” “ Y,” “ Y,” “ Y,” “ Y,” “ Y,”  
“ Y,” “ Y,” “ Y,” “ S,” “ S,” “ S,” “ -,” “ Y,” “ S,” “ S,” “ S,” “ S,” “ S,”  
“ Y,” “ -,” “ Y,” “ S,” “ S,”  
“ S,” “ Y,” “ Y,” “ Y,” “ -,” “ S,” “ S,” “ S,” “ Y,” “ Y,” “ Y,” “ Y,” “ Y,”  
“ Y,” “ Y,” “ S,” “ -,” “ Y,” “ Y,” “ Y,” “ Y,” “ Y,” “ S,” “ S,” “ S,” “ S,”  
“ S,” “ Y,” “ S,” “ S,” “ S,” “ S,”  
“ S,” “ S,” “ S,” “ S,” “ S,” “ S,” “ S,” “ S,” “ S,” “ S,” “ Y,” “ S,” “ S,”  
“ S,” “ S,” “ S,” “ S,” “ -,” “ S,” “ -,” “ S,” “ S,” “ -,” “ Y,” “ Y,” “ S,”  
“ Y,” “ -,” “ Y,”  
“ Y,” “ -,” “ Y,” “ Y,” “ Y,” “ Y,” “ Y,” “ S,” “ S,” “ S,” “ S,” “ -,” “ S,”  
“ S,” “ Y,” “ Y,” “ Y,” “ Y,” “ Y,” “ S,” “ S,” “ Y,” “ Y,” “ Y,” “ Y,” “ S,”  
“ S,” “ Y,” “ Y,” “ S,”  
“ S,” “ S,” “ S,” “ S,” “ Y,”  
“ Y,” “ S,” “ S,” “ Y,” “ Y,” “ S,” “ S,” “ S,” “ S”

3.58109777,2.763463729,11.9273110164242,3.136323393,2.933534906,3.36461995839395,0  
.890243902,5.494312986,3.372437835,20,4.109713686,3.997584179,6.459220507,3.1399483  
35,4.350566591,4.798395193,8.468206648,2.468772677,2.860128304,2.330170131,5.387668  
975,3.022295734,4.770703447,3.021796079,3.479103699,2.731831005,2.533748135,3.41541

0002,2.874062238,5.392486971,4.457585083,"S," “ S,” “ Y,” “ Y,” “ Y,” “ Y,” “ Y,”  
“ Y,” “ Y,” “ Y,” “ Y,” “ Y,” “ S,” “ S,” “ S,” “ Y,” “ Y,” “ Y,” “ S,” “ S,”  
“ S,” “ Y,” “ Y,” “ Y,” “ S,” “ Y,” “ Y,” “ S,” “ S,” “ Y,” “ Y,” “ Y,” “ Y,”  
“ Y,” “ Y,” “ Y,” “ Y,” “ -,” “ S,” “ S,”

“ S,” “ Y,” “ S,” “ S,” “ S,” “ Y,” “ Y,” “ Y,” “ Y,” “ Y,” “ Y,” “ S,” “ S,”  
“ S,” “ Y,” “ Y,” “ Y,” “ S,” “ Y,” “ Y,” “ Y,” “ Y,” “ Y,” “ Y,” “ S,” “ S,”  
“ S,” “ S,” “ S,” “ Y,” “ Y,” “ Y,” “ Y,” “ S,” “ Y,” “ Y,” “ S,” “ Y,” “ Y,”  
“ Y,” “ Y,” “ Y,” “ Y,” “ Y,” “ Y,” “ S,” “ S,” “ S,” “ Y,” “ Y,” “ Y,” “ S,”  
“ S,” “ S,” “ S,” “ S,” “ S,” “ S,” “ S,” “ S,” “ S,” “ S,” “ Y,” “ Y,” “ Y,”  
“ Y,” “ Y,” “ Y,” “ Y,” “ -,” “ Y,” “ Y,” “ S,” “ S,” “ S,” “ S,” “ Y,” “ Y,”  
“ Y,” “ Y,” “ Y,” “ S,” “ Y,” “ Y,” “ Y,” “ Y,” “ S,” “ S,” “ Y,” “ S,” “ Y,”  
“ Y,” “ Y,” “ S,” “ Y,” “ Y,” “ Y,” “ S,” “ S,” “ Y,” “ Y,” “ Y,” “ -,” “ Y,”  
“ Y,” “ S,” “ Y,” “ Y,” “ Y,” “ Y,” “ Y,”  
“ Y,” “ S,” “ S,” “ S,” “ Y,” “ Y,” “ Y,” “ S,” “ S,” “ Y,” “ S,” “ S,” “ S,”  
“ S,” “ Y,” “ S,” “ S,” “ Y,” “ Y,” “ S,” “ S,” “ Y,” “ Y,” “ S,” “ S,” “ S,”  
“ S,” “ Y,” “ Y”

3.885313861,2.932564669,11.5492018565725,2.738484695,3.099450838,6.0481251740728,0  
.953883495,5.799617188,5.264370217,4.067759045,4.667802172,3.339454562,4.757182983,  
4.327036491,3.74045066,3.78010823,6.283091614,2.754937967,2.872921702,2.27415566,3.  
128198678,2.911925992,2.694879876,3.199591112,7.813550719,2.709175061,2.862163814,

3.606169349,2.959446521,3.433063012,5.036746423,"S," “ S,” “ S,” “ S,” “ S,”  
“ S,” “ S,” “ S,” “ S,” “ S,” “ S,” “ Y,” “ -,” “ -,” “ Y,” “ Y,” “ S,” “ S,”  
“ S,” “ S,” “ -,” “ Y,” “ -,” “ Y,” “ S,” “ Y,” “ Y,” “ Y,” “ Y,” “ Y,” “ Y,”  
“ Y,” “ S,” “ S,” “ S,” “ S,” “ S,” “ Y,” “ Y,” “ Y,” “ S,” “ Y,” “ S,” “ S,” “ S,”  
“ Y,” “ S,” “ S,” “ S,” “ Y,” “ S,” “ S,”  
“ S,” “ Y,” “ S,” “ S,” “ S,” “ S,”  
“ Y,” “ Y,” “ Y,” “ Y,” “ Y,” “ S,” “ S,” “ S,” “ Y,” “ S,” “ S,” “ S,” “ Y,”  
“ S,”  
“ S,” “ S,” “ Y,” “ Y,” “ Y,” “ Y,” “ -,” “ Y,” “ S,” “ S,” “ S,” “ S,” “ S,”  
“ S,” “ S,” “ S,” “ Y,” “ Y,” “ Y,” “ Y,” “ S,” “ S,” “ S,” “ S,” “ S,” “ S,”  
“ S,” “ S,” “ S,” “ S,” “ S,” “ S,” “ S,” “ Y,” “ Y,” “ S,” “ S,” “ S,” “ S,”  
“-,” “ S,” “ S,” “ Y,” “ S,”  
“ S,” “ S,” “ S,” “ S,” “ S,” “ S,” “ Y,” “ Y,” “ S,” “ S,” “ S,” “ S,” “ Y,”  
“ Y,” “ S,” “ Y,” “ Y,”  
“ Y,” “ Y,” “ Y,” “ Y,” “ Y,” “ Y,” “ Y,” “ Y,” “ Y,” “ Y,” “ Y”
