# Supplementary material
Source: PubMed Central journal article supplement (PMC2148299)

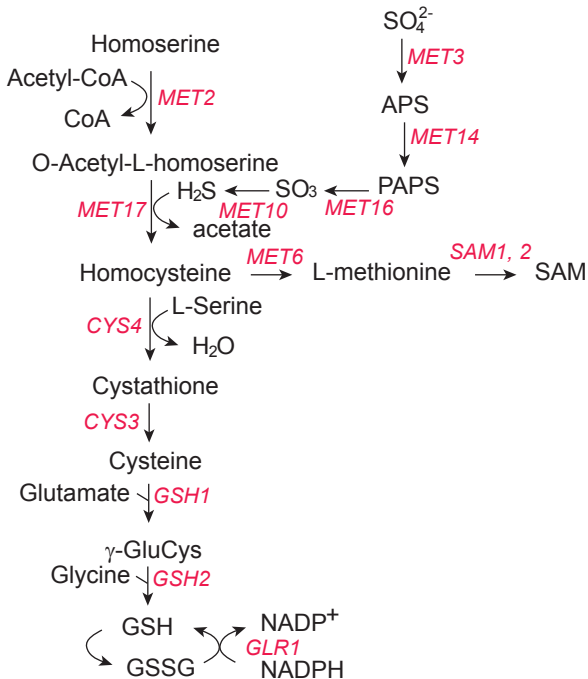

Supplement: pnas_0708194104_1.pdf [file pnas_0708194104_1.pdf]

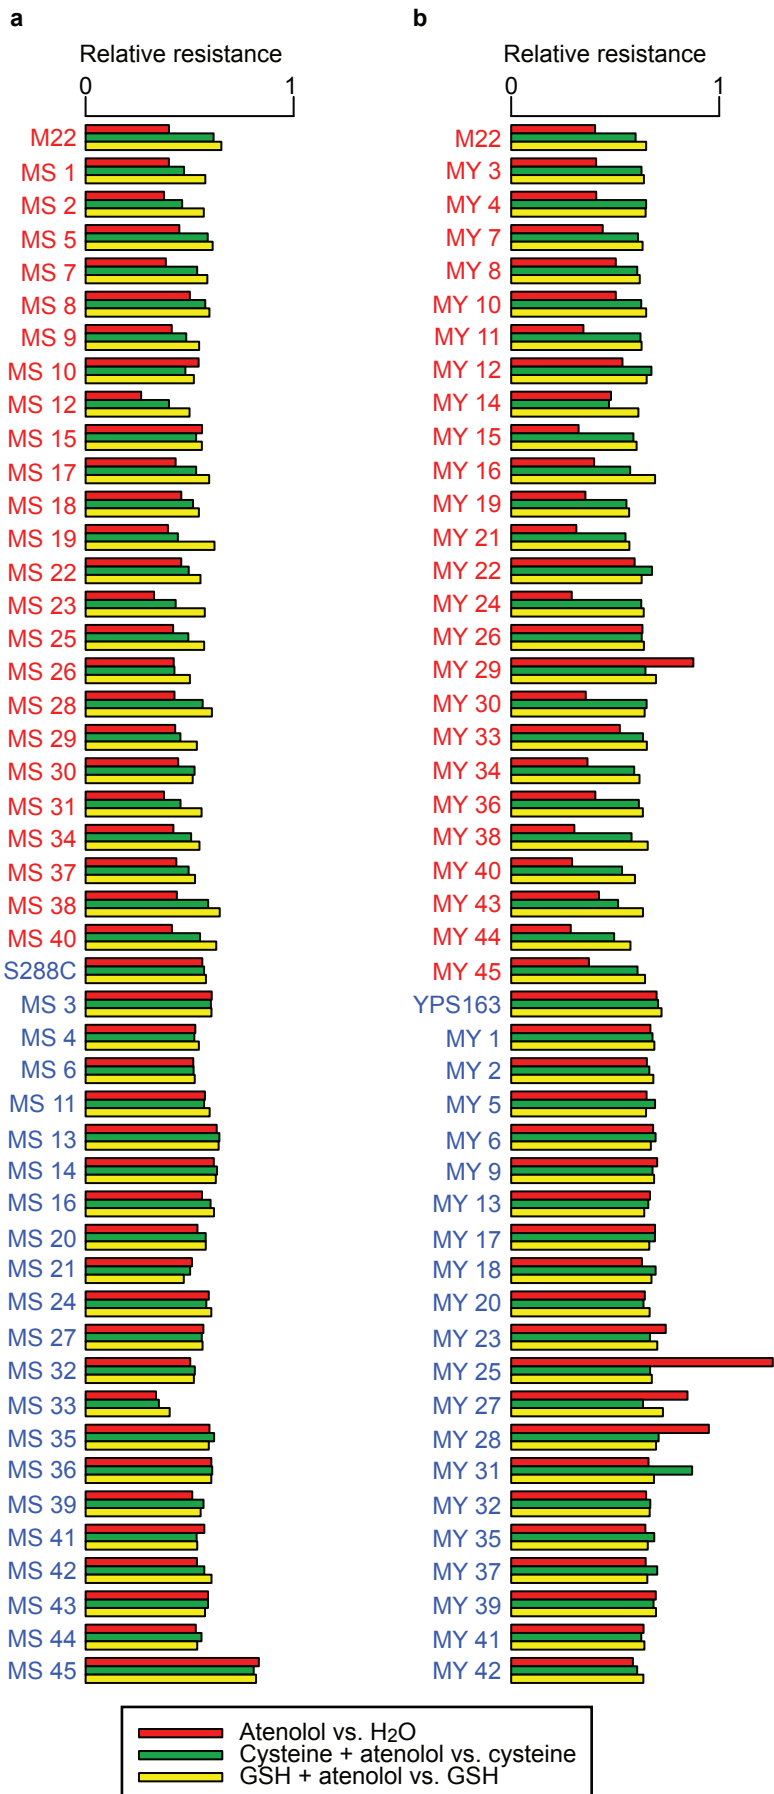

Supplement: pnas_0708194104_2.pdf [file pnas_0708194104_2.pdf]
